# Supplementary material for: Determining the factors affecting customer satisfaction using an extraction-based feature selection approach
Source: PeerJ Comput Sci. 2022 Jan 25;8:e850. doi: 10.7717/peerj-cs.850 (PMC8802791; doi:10.7717/peerj-cs.850)
Supplement: Supplemental Information 1 [file peerj-cs-08-850-s001.xlsx]

## Sheet: Sheet1
Star Rating_alt	Review Text
1 star: Bad	Have used booking.com for years but this recent experience has put my right off. As per their genius reward program, after 5 stays in two years, you get level 2 of this program. However, when I got to 5 stays, all of a sudden i was not eligible for it as i “booked through an affiliate” (which i can categorically say i did not). Tried to contact customer service (which was almost impossible to fin…
1 star: Bad	Wow! I was coming to write a review with my experience with them thinking I was anomaly. I guess in a way I’m relieved and saddened that I’m not the only one. Same issue. COVID! If everything is stopped how the hell do you expect me to get there. I was not cancelling, the world was at a standstill. Anyway, luckily I bought on my credit card and filed a dispute. I got my money back after 6-8 weeks…
1 star: Bad	I gave this site a 1 star because zero was not an option. They did not cancel a reservation when requested and I was charged. It took forever to get through to customer service and when I did they were no help at all. The hotel in question, Best Western Yacht Harbor Hotel in San Diego was not helpful either. I do NOT recommend either.; I gave this site a 1 star because zero was not an option. The…
1 star: Bad	Hi went to Morzine in France and used booking.com.booked hotel as photos looked fine however because I’d been there two day I thought I’d check it out. Good job I had. As I’d traveled with van and three bikes.two expensive ebikes.Which requires charging.so I called in asked about parking and access to rooms? Parking replied of road parking over road from pub. Room access smack next to bar. In cen…
1 star: Bad	If you have a problem related to your booking, do not call them, they will hang up, after 20 minutes waiting. just do not use them again.; If you have a problem related to your booking, do not call them, they will hang up, after 20 minutes waiting.; just do not use them again.
1 star: Bad	In the high season my apartment costs 455 Euro weekly. Booking.com asks you 189 more !! I didn't know until I just saw my tenant's lease. Advice: book directly through the village / city (Walcheren, Domburg) where you want to go! Saves you almost 30% Met vr.gr. Yolan; In the high season my apartment costs 455 Euro weekly. Booking.com asks you 189 more !! I didn't know until I just saw my tenant's…
1 star: Bad	We cancelled our booking at an apartment in Majorca, over 60 days in advance of our arrival, (liable for only the deposit), due to critical and life changing illness. We asked if they would refund the deposit in our case. Booking.com confirmed receipt of our cancellation. The owners never replied. After 2 months of no response or communication, the owners took the full balance from our credit car…
1 star: Bad	Covid 19 restrictions introduced by UK against Spain resulted in cancelling my stay at Novotel Barcelona at short notice - not my fault but did I get a refund - NO CHANCE - money grabbing by Accor and Booking.com- last time for either company - no empathy at all for people and the worldwide situation; Covid 19 restrictions introduced by UK against Spain resulted in cancelling my stay at Novotel B…
1 star: Bad	Avoid booking through this company. They're awful! Quick to to take your money but take a lifetime to give you your rightfully claimed refund.; Avoid booking through this company. They're awful! Quick to to take your money but take a lifetime to give you your rightfully claimed refund.
1 star: Bad	We had a reservation at a different place that was cancelled by the property due to a broken pipe that was getting fixed. Booking did not notified it to us at any moment and we learned about this already at the property (2400km away from home). They did not put a lot of effort in relocating us and actually, we are still waiting to hear from them. We had chosen a nice affordable location with enou…
1 star: Bad	I booked a caravan in Cumbria for family for 3 night break with Booking.com approximately 2weeks before holiday was due. On arrival I was told there was no record of my booking. Luckily the site had one caravan available to accommodate us. I contacted Booking.com by email and at 23.00hrs that night I received an email to say my booking had been cancelled and they had found me alternative accommod…
1 star: Bad	Nonrefundable rooms are scams. Recently cancelled my reservation, got charged for it, when I checked to see if the hotel room was still available, it was already gone. The hotel refused to refund my money claiming I've costed my stay and booking.com only bothered with an automated reply not even trying to resolve the issue. If you can't find a refundable room, go directly to the hotel don't bothe…
1 star: Bad	Absolutely disgusting. Booked Amsterdam in February for my brothers 18th birthday and then COVID happened. We managed to change the dates to start of September. However with Holland being added to the quarantine list we cannot work from home and my dad cannot afford to not work. This was a large expense for a special occasion. Booking.com have told us there is nothing they can do as we have 'no r…
1 star: Bad	Terrible customer service . I booked a trip to a hotel that wasn’t even open through booking.com . They will take no responsibility for their lack of communication or are not prepared to give any compensation to a valued customer who has/had numerous other bookings . I had to source alternative accommodation due to no response on their customer service booking assistant service . This was more ex…
1 star: Bad	I have used booking.com for many years without any issues. It is with a heavy heart I write this review. Recently i arrived in Spain at 23:00 hours and the hotel was closed and doors padlocked. I rang the number on the door but no reply. I found another hotel eventually and wrote a complaint e mail to booking.com. After sending over 40 e mails and trying to contact them I received an e mail stati…
1 star: Bad	I won't be using Booking.com again. I've used them a few times in the past but with this last booking I had to make a change which revealed how poor their customer service actually is. I had decided to upgrade my reservation from a 1 bedroom to a 3 bedroom unit. They assured me that the change was confirmed with the property but when I arrived I was told that my reservation was for a 1 bedroom. T…
1 star: Bad	As a property owner in the south of France, I can only recommend you book direct or through another company and certainly if you are thinking of listing your property with them...DONT!!! High commission rates, awful customer service, inability to contact them and slow payments. We have now waited 32 days and 25 days for payments that they are contracted to make in 10 days. Excuse after excuse and…
1 star: Bad	Booked a property via Booking.com "le Clos du Carriou", Lesgor, France. Arrived to find it was absolutely filthy.No way we could stay. Booked somewhere else on Booking.com for the same night and cancelled the first property. Owner refused refund.Booking.com initially said they would refund our money, then changed their mind. We are still waiting for our review to go on their site which explained …
1 star: Bad	NEVER USE THIS SITE. 1. CUSTOMER SERVICE...WHAT CUSTOMER SERVICE!! WILL DO NOTHING TO HELP THE CUSTOMER, AND POOR ATTITUDE. 2. IF YOU WANT TO WAIT WELL OVER TWO WEEKS ON A REFUND!!! PLEASE GO ELSEWHERE TO BOOK A TRIP AWAY WITHOUT THE STRESS!!; NEVER USE THIS SITE.; 1. CUSTOMER SERVICE...WHAT CUSTOMER SERVICE!! WILL DO NOTHING TO HELP THE CUSTOMER, AND POOR ATTITUDE.; 2. IF YOU WANT TO WAIT WELL O…
1 star: Bad	They dont do anything. Just lazy. We the consumer has to do most of it. If there is an issue, you must go through the hotel directly. They dont assist you. When you ask, they waste time and give you the runaround. Worst. They have no care for any customer.; They dont do anything. Just lazy. We the consumer has to do most of it. If there is an issue, you must go through the hotel directly. They do…
1 star: Bad	Booked accommodation in London which was paid for 30 days before the trip in April. We had to postpone due to lockdown and on trying to rebook the accommodation discovered it was no longer available. Despite Booking.com taking the payment they claim it is nothing to do with them and will not refund the £800. I cannot understand why this is not fraud as they have taken payment for accommodation th…
5 stars: Excellent	We have just had 4 nights in this beautiful apartment, great views across to millport & beyond. The owners couldn't do enough for us & we will definitely be back. Brilliant value for money, you won't be disappointed.; We have just had 4 nights in this beautiful apartment, great views across to millport & beyond. The owners couldn't do enough for us & we will definitely be back. Brilliant value fo…
1 star: Bad	The company allows for misleading advertising and is not helpful when complaints are raised.; The company allows for misleading advertising and is not helpful when complaints are raised.
1 star: Bad	I booked a room. I specifically asked for a room w a beach view. Got an inside room. Then i messed up when i was booking the room and put 4 instead of 5 people. I have been trying to fix my room type for more than 8 hrs getting sent from one phone call to another all day long. Still noone is able to help! I suggest noone book through booking.com as they can not help with anything. After you have …
1 star: Bad	checked into Eurostar Grand Marina Barcelona & the hotel clearly not adhering to Covid regulations - took photos & videos & called Booking.com for assistance as hotel management not available & they did NOTHING they were not interested in the safety of their clients - the accommodation was not as described totally mis-sold to us & they are refusing a refund - although we were moved we couldn’t ev…
1 star: Bad	Do not book anything with booking.com worst company ever...I booked and had a email for 90.00 got to front desk and the guy charged my card 114.00 and then 24.00 and was very rude so we didn’t stay there and left and he would not refund me back and booking.com did not help at all; Do not book anything with booking.com worst company ever...I booked and had a email for 90.00 got to front desk and t…
1 star: Bad	This is the worst company ever to book a holiday with/via. Had to move holiday dates due to covid, so they decided to charge me yet another £40 for the privilege. Said they would refund me, asking for the proof of payment which I've sent twice, but now they are asking for a third time. They are worse than hopeless. Never ever again will I book through this agent. Go somewhere else and save yourse…
1 star: Bad	This company is the worst i have ever experienced in my whole life. We booked a room with certain facilities and we arrived and didnt have any of the facilities. We booked a room with tub and balcony OR terace. NONE of it was what we were giving. We paid extra for this. 1700kr for two nights !! We concact booking and they will not give any compensation - we send them photos and have word from the…
1 star: Bad	What a shocking company. We just drove all the way to the Lake District, spent three days in a lovely pub in the north and then headed south to Windemere to find they had cancelled our booking for Bannerig View Cottage. There are so many other booking agencies out there - DO NOT USE Bookings.com: they are totally unreliable.; What a shocking company. We just drove all the way to the Lake District…
1 star: Bad	Was meant to stay at the East London Hotel on the 25 - 27 June and paid £205, but due to the Covid19 pandemic the hotel was closed and we could not go. Since trying to get into contact with booking.com we are made to wait 30 - 45 minutes on hold which costs money per minute. I am pretty sure they do this on purpose so that they can rinse more and more money from you. I have phoned two times over …
1 star: Bad	Avoid Despite easyjet cancelling our flights for outgoing and returning booking .com will not give us a refund for hotel in spain absolutely nightmare would like to know how we was meant to get to spain then to be told by the lady on the phone if we can prove we are in lockdown they mit think about it; Avoid Despite easyjet cancelling our flights for outgoing and returning booking .com will not g…
1 star: Bad	Absolutely disgusted with this company! We booked an overnight stay through them to stay in a hotel and for some apparent reason they just picked a random date for our stay not the one we wanted. When we contacted them they made no effort to rectify this, never admitted liability and therefore we lost £108, which they made no effort to reclaim for us, all through their calamitous doings. Avoid th…
1 star: Bad	I have booked quite a lot of stays with this company and always trusted them. However - recently my friends and I booked 4 different places in Donegal to stay as we were going on a bike trip. One of the places expected payment up front. This is where our final night was to be. We paid. Then three days before our trip we were advised that we could not travel outside of our county (Kildare) due to …
1 star: Bad	No customer service action. They confirmed my room, with a dog (I have all of the emails to support this) and then the hotel refused it. I was then labelled a “no show” when both booking.com AND the hotel cancelled, not me. THEN the hotel took $100 from my account for a no show, when they were the ones to cancel. Customer service refused to acknowledge their error or work with me. I am out $100 w…
1 star: Bad	I had the unfortunate opportunity to use booking.com in July. I reserved a rental car for scheduled pick up July 8. I arrived at pick up location at the scheduled time, waited only to be told by the agent that there was no car for me. The car rental counter said it was the “ 3 rd parties” responsibility to call me to inform me of no car. I reviewed my missed call’s, there were none. I immediately…
1 star: Bad	DO NOT USE we paid this company for a holiday our last money we have saved through the covid pandemic we have had a bad year so thought we needed a break They have taken our money and now said they can’t process the booking even though the booking was confirmed Do not pay these guys pay the hotel direct we had this option and I’m heart broken this has happened . We have paid flights upfront and t…
1 star: Bad	You booking on booking.com never know what expect. I booked a short stay at the blue mountain Ontario last week you think the booking is withe blue moutain resort itself. The day of the check-in you find yourself booked with a private property not with the resort itself, quite a disappointment.; You booking on booking.com never know what expect. I booked a short stay at the blue mountain Ontario …
1 star: Bad	Woeful. Cancelled hotel when I was boarding plane. Not interested and blame hotel despite hotel informing them of this 3 days previously. Pedro from Customer services couldn’t have been more rude. Seemed to forget who the client was. Used them for years. Won’t use them again due to Pedro and his poor attitude.; Woeful. Cancelled hotel when I was boarding plane. Not interested and blame hotel desp…
1 star: Bad	Booking.com do not care about you and your holiday. We Arrived at the hotel and had to pay on arrival due to COVID but when we got to the room is was disgusting. Really bad. The hotel refused to give us a refund and we had to leave to find another place to stay, they told us to claim our refund back via booking.com. We have explained the situation and they have point blank refused the refund. Abs…
1 star: Bad	Booked a campsite in France with my husband and two kids 7 and 5. Arrived by taxi only to be told we were booked in at associated campsite some 17km away. Another taxi costing 35 euro to the right campsite. Booking.com staff were rude and unhelpful. After 3 unacknowledged messages I eventually used the live chat...so disappointed with the attitude of staff. I was told that because we accepted the…
1 star: Bad	We received an email the night before we were due to arrive at the property saying that the owner had cancelled. We were promised a refund and compensation (in another email) but nearly 2 weeks later we have received no refund and nobody will answer my questions about claiming the compensation.; We received an email the night before we were due to arrive at the property saying that the owner had …
1 star: Bad	In April I had to cancel a trip due to covid19 the hotel took payment as it was non refundable due to covid they agreed through booking . Com to issue a voucher.I recently tried to redeem it following the instructions the web page did not exist.Contacting the property for advice 4times without any response.So a voucher issued is of no use.The hotel involved is Excelsior hotel Frankfurt.Shocking p…
1 star: Bad	I used booking.com to plan a trip in July. The confirmation email was sent to a previous email address despite me having set up the account on a different email and having confirmed an alternative email when I travelled with them last year. On arrival at the hotel, I was charged more than i was expecting and when i finally managed to get hold of the invoice, there seemed to be no genius discount,…
1 star: Bad	Terrible company.. I book often always chose pay at hotel option...but the hotel royal in Nice took payment immediately! When I cancelled 2 days before trip they wouldn't refund..look on Instagram terrible #scammers do not use use other company! Thousands scammed by this!; Terrible company.. I book often always chose pay at hotel option...but the hotel royal in Nice took payment immediately! When…
1 star: Bad	Absolutely garbage company Can not find a customer service number, when i find it , its saying you need to have confirmation number and pin code to contact customer service, without it you wont be able to contact them, when I type the confirmation and pin number, its saying can not find confirmation number or pin. I booked holiday on April, due to covid-19 I had to cancel it, its been more than 3…
1 star: Bad	Absolutely awful, stay clear at all costs. I Will be escalating this company to the highest possible. Always book direct with the hotel itself- never via here. Please note a lot of the hotel are not available that the advertise for so they will be taking tour money then cancelling, hopefully you will still have extra monies to rectify the immediate problems as it can take weeks or even months to …
1 star: Bad	Absolutely shocking they use false b&b's what are nothing like the pics what we booked weve brought it up with them complained and nothing absolutely nothing just be aware of ebers hotel in Nottingham its absolutely shocking got told it was for nhs workers nop it was for homeless and nothing like booking.com shows on there website we told them totally false advertising but are they bothered no ju…
1 star: Bad	Beware they are telling you on there site that deposits and payment will not be taken until just before your holiday we just had the full amount taken overnight and are struggling to get it back from an Italian hotel , it said it would not be taken in full . Complete lies; Beware they are telling you on there site that deposits and payment will not be taken until just before your holiday we just …
1 star: Bad	Absolutely awful experience Booked a hotel, traveled by car for 7.5 hrs, hotel closed. Staff say they notified everyone to say they were closed. Booking.com, not interested. Customer services is awful. I raise complaints, they delete them from the online account. They are a waste of time and space. Book direct or through another site, they have had their last penny from me.; Absolutely awful expe…
1 star: Bad	I have used booking.com for years and have not had a bad experience until now. They say a company is only as good as it's customer care and this is sadly the case for booking.com. We stayed in 2 different destinations in Gran Canaria recently, the 1st apartment was fine but after checking into the 2nd one in puerto rico we went down to the beach and when we returned we had no hot water. We report…
1 star: Bad	Worst experience of customer support ever ever. We booked a room, and it was a nightmare. Broken furniture, stains on the bed, living insects. We decided not to stay. They refused to refund price for 1 night, 87 euros.; Worst experience of customer support ever ever. We booked a room, and it was a nightmare. Broken furniture, stains on the bed, living insects. We decided not to stay. They refused…
1 star: Bad	I reserved a hotel offering free cancellation. 20 minutes later I cancelled as my partner had booked a different hotel. I even rang the hotel to let them know. They then took the full amount out of my account and refused to refund it! Criminal!!!; I reserved a hotel offering free cancellation. 20 minutes later I cancelled as my partner had booked a different hotel.; I even rang the hotel to let t…
1 star: Bad	with acommodation being cancelled because of covid, i was supposed to receive refunds from two stays at different locations booked through booking.com. one of them never got refunded, and booking made no effort whatsoever to make the hotel make the refund, going so far as to saying i had to "prove" i hadnt gotten a refund, althought they also refused to tell me when the refund was supposedly issu…
1 star: Bad	Will not use or advise anyone to use this company. I booked rooms for a hotel which were cancelled due to Covid-19, they are telling me the hotel will take 90 days from my room booking date to refund me even though the hotel was closed in June. Booking.com want me to chase the hotel If I'm not happy so what was the point of using them !! The hotel by the way was Jury's Inn Exeter, I won't be usin…
1 star: Bad	I was so disgusted as to how I was treated by booking.com when I had a problem with the booked destination's accomodation that I will NEVER subscribe to, book through or recommend booking.com EVER!!!! ABSOLUTELY DISGUSTING SERVICE. Their negligence ruined our holiday. Do not use booking.com; I was so disgusted as to how I was treated by booking.com when I had a problem with the booked destination…
1 star: Bad	Booked a car via booking.com for 10 days. We had to come home early and return the car as my son was in accident. Booking.con refuse to refund the unused days even though the car hire company said they won’t be charged. If you book direct you won’t suffer our misfortune; Booked a car via booking.com for 10 days. We had to come home early and return the car as my son was in accident. Booking.con r…
2 stars: Poor	I'm having a hard time dealing with them. Trying to get a refund from them for a refundable booking. Cant get in touch with anyone at the moment. I keep getting passed around.; I'm having a hard time dealing with them. Trying to get a refund from them for a refundable booking. Cant get in touch with anyone at the moment. I keep getting passed around.
1 star: Bad	I February, I booked a night at a hotel in Dundee for 25th April 2020, but had to cancel due to Covid-19. I took the cheapest option with no refund. However, Booking.com asked if I wanted them to ask hotel to waive cancellation charges. Obviously I replied that I would. The Hotel manager emailed me to advise that they had authorised a full refund. Despite several emails to Booking.com, no reply w…
1 star: Bad	joke of a company!!! Even 1 star is being generous. Booked a hotel through booking.com with book now pay later, but had to cancel the hotel due to a change in plans. Got confirmation that hotel booking was cancelled and thought nothing more about it. Until the full amount for the room was taken from my partners account, contacted booking.com to see why this has happened. Only to be told that the …
1 star: Bad	Worst customer service ever. I am using booking.com since years, but last time the room didn't fit the size of my family. Usually you get an error message saying that you need to book an additional room and can not go further, this was not the case so I assumed there will be a pulled out bed. It was not the case and the hotel said it was booking responsibility.; Worst customer service ever. I am …
1 star: Bad	If i could give them 0 stars they would deserve this. We planned a family trip made the reservation on booking.com paid for the reservation at the last minute they cancelled something to do with repairs to the property.We are not rich i need my refund to get a different location so they send me an email it would take 7 to 12 days for my refund and my trip if 4 days away. I would tell everyone i k…
1 star: Bad	Worst website for booking a accommodation. They provided a disgusting a hotel on their website,I can’t get through to them now and I still haven’t gotten a refund after not staying there. Stick with Expedia. This is disgraceful.; Worst website for booking a accommodation. They provided a disgusting a hotel on their website,I can’t get through to them now and I still haven’t gotten a refund after …
1 star: Bad	Really bad, they only think about making money and not the customers or clients using their web site. You talk to a robot not a person AVOID; Really bad, they only think about making money and not the customers or clients using their web site.; You talk to a robot not a person; AVOID
1 star: Bad	Absolute disgrace ,twice now, should never have trusted them second time. Booked hotels for work, money taken in full immediately on booking to then receive email next day saying booking cancelled, this time due to no water at Hotel, situation now is i am in Plymouth at height of Holiday season and can’t get anywhere to stay, will have to sleep in van tonight and then scumbags still have my money…
1 star: Bad	I am trying for 4.5 months to get a refund for the fully paid reservation that was cancelled due to lockdown. The hotel (one of the Ibis hotels in Paris) stopped communicating, even though I went along with their ungrounded requests: sending them copies of my ID and credit card, etc. Booking.com "were ready" to help me and ensured me that sending these documents is absolutely necessary and I will…
1 star: Bad	Really unhappy with the customer service. We were due to go away and booked our hotel well in advance, we received an email the morning we were travelling (while on our way) to say the hotel had been overbooked and our reservation was no longer valid. Although a refund has been promised this has not yet been received but worse still we had to spend the first 3 hours of our break trying to find an…
1 star: Bad	Everything is great if there are no problems with the accommodation booked - if there are issues, booking.com will of course try to resolve the issue with the provider, but they have no authority to issue refunds so effectively as a consumer you are not protected from scams and/ or unfair accommodation providers. To be protected via the consumer protection act with credit card booking, the bookin…
1 star: Bad	I had to cancel my early April 2020 holiday in Wales (for 11 people), due to COVID rules. I am still waiting for our money to be returned (4 months later), following numerous phone calls, emails, use of independent complaints (Resolver). We are talking about a lot of money (over £2K), which none of us can afford, in this present climate in particular. This is such a stressful situation. B.Com hav…
1 star: Bad	Booked 4 nights in a Blackpool B&B, Chaplins via booking.com. On arrival, 'wet' blood on sheets and duvet from previous guest, prostitutes coming and going, serious violent abuse with neighbouring guests so informed booking.com who said I would get a 100% refund as I paid them directly. Having booked this B&B solely on their 3 star rating by Visit England, where booking.com advertise a minimum of…
1 star: Bad	Cancelled a booking in May and am still awaiting a refund. Finally managed to speak to Customer Service, two calls of 45 minutes and 58 minutes and still did not manage to resolve situation. Going through my credit card company, Section 75, to see if I can get refund.; Cancelled a booking in May and am still awaiting a refund. Finally managed to speak to Customer Service, two calls of 45 minutes …
1 star: Bad	Booked two rooms in a pub in Norfolk for 2 nights to take my children and mum away. As it is the busy Summer season we booked several activities for the 3 days we should have been there. At 8pm the night before leaving we received an email to say that the booking was cancelled. They suggested rebooking at an alternative pub but this was 20km from the original and made some of our plans unviable. …
1 star: Bad	Booked a hotel 3 days before due to travel. Money taken from account on the same day and confirmation email received. Arrived at hotel on the day to be told that no booking was there and that they had informed booking.com days before that they were full. There was also 4 other families there with the same issue. Booking.com and the queens hotel eastbourne both passed responsibility. Having travel…
5 stars: Excellent	Very good website if you looking for cheap hotels for last minute or even short break I recommend; Very good website if you looking for cheap hotels for last minute or even short break I recommend
3 stars: Average	Very good location but found the owner to be a bit stand offish when we first arrived no very welcoming at first . straight to the point Then left us to it shower needs to be updated apart from that ok but we not be going back a bit over priced for what you get for your money; Very good location but found the owner to be a bit stand offish when we first arrived no very welcoming at first . straig…
4 stars: Great	Spent the w/end 7-9th August 2020 at the Florian guest house. Great location as was half a mile walk to the town of Weymouth. Interaction seemed abit distant with proprietor. Good value for money for room only, for 3 of us, double & 2 single beds, no b&b, limited car parking on front of guest house. Very warm room on top 3rd floor but was a very warm w/end. Had a fan in the room. If a return visi…
1 star: Bad	A number of weeks ago we decided that with our summer holiday abroad in doubt because of COVID we would book a weekend away with the family (including the dog). Having been a regular user of hotels.com for years I initially decided to search via them. However, with us only recently getting a new puppy it seemed much easier to use the booking.com website to filter properties for pet friendly place…
1 star: Bad	I booked a room with Booking.com I cannot seem to get anywhere close to talking to customer services I don’t have a pin number it’s not showing on the confirmation he seems to be the biggest load of crap out what happened to traditional you pick up the phone or you talk to somebody I won’t be booking another after this booking Is sorted . I will never want to use Booking.com again is the biggest …
1 star: Bad	We booked a family room at the Barrowfield hotel in Newquay for one night with booking.com. When we arrived at the hotel they told us that booking.com had only reserved a twin room, even though on my confirmation email it said family room. The hotel tried to contact them with no success. The hotel also rang other hotels to see if they could accommodate us but as it was August they were all fully …
1 star: Bad	Please be influenced by the reviews here. They have total contempt for customers, and never answer your calls or email. My experience involved a booking for a hotel that was not open when I turned up and they are refusing to refund. Be warned and avoid them.; Please be influenced by the reviews here. They have total contempt for customers, and never answer your calls or email. My experience invol…
1 star: Bad	I do not think this company is a good company due to my experience of booking a hotel to go along with a concert that I had booked for myself and my boyfriend, we placed the booking and the first time they denied the booking and the cars, so we placed the booking again! Then I checked my bank statement and they had taken both payments, when I called to discuss this it took me twice to get through…
1 star: Bad	I cancelled a booking with "free" cancellation and booked a different hotel room via their site. I ended up getting bounced around by Booking.com and was never refunded the nearly $1300.00 booking fee for the first booking. I spent $2600.00 for two simultaneous bookings. I was assured they would reimburse me. All i got was endless excuses. This company does not stand behind their claims.; I cance…
1 star: Bad	I’ve never experienced such awful customer service. I booked a luxury seafront villa for a two night stay with Deluxe Holiday Homes Limited. I filled in all the online covid related stuff I was emailed with the confirmation. We drove for four hours, arrived and called the number we were told to ring to get the key code to get in. First time I left a message, called again after half hour and the o…
1 star: Bad	I booked a hotel in eastbourne with booking.com, travelled there and 2 hours before check in they informed me the hotel had cancelled the reservation. I rang the hotel and was informed they didn't confirm and were now fully booked. After phoning and on hold for 20 minutes, booking.com offered me an alternative,without an address, and no taxi driver had heard of it. We decided to go back home. The…
1 star: Bad	This company has absolutely diabolical customer service! Whatever you so DO NOT use this company to book your hotel as they STEAL your money!! We booked a hotel for a night away which we were told was confirmed and paid for to then turn up at the hotel to find it was closed as was in the middle of having a change of management! We spent almost 2 hours trying to call them to figure out what to do …
1 star: Bad	Canceled my accommodation before the deadline for a free refund expired, this due to corvid. I never received a refund from the accommodation despite the fact that I had many messages via Booking and telephones where this was promised to me. (After a while, Booking.com deleted my inbox that I had on my site) Booking.com promised after several phone calls to sort out the matter and to pay my expen…
1 star: Bad	If I could give -10 stars I would, booked an apartment in Dartmouth Devon received confirmation email to say was reserved, after seeing apartment still advertised on its own website and other websites I started to get worried, unable to contact booking.com and owner always engaged or owner(management company) was in Switzerland not ringing them to costly. Finally contacted booking.com they inform…
1 star: Bad	I thought I had booked accommodation to go to Bristol and see my son on this site. Within the hour they had cancelled due to 'overbooking'. They had, however, taken £138 from my credit card, a fact which only came to light nearly 2 weeks later when they sent me an email telling me I would have to wait (another) 10-15 days to get a refund. Of course I will have to pay interest on this amount as th…
1 star: Bad	Booking had asked me to pay in February und I do so. Wen die Pandemic began, I asked if money return possible is. Booking has the ball further on played and I became no money return!! Completely disappointing!! Finger weg!; Booking had asked me to pay in February und I do so. Wen die Pandemic began, I asked if money return possible is. Booking has the ball further on played and I became no money …
1 star: Bad	This company should not be allowed to operate- stay clear at all costs. They mislead me into believing I could make a booking, took my money then cancelled it. It’s been two weeks now and I still haven’t received my money back. This company left me extremely vulnerable abroad where I had no where to stay nor the monies to purchase further accommodation as they had taken my money then cancelled it…
1 star: Bad	Never realised Booking.com had such an awful reputation until I read these reviews! I’ve never felt a need to leave any company a negative review in my life before, but recently I have had an awful experience with them.. where they had let me book an apartment which wasn’t even available (the owner had told them numerous times it needed to be taken down, but they hadn’t.) I paid and had all the c…
1 star: Bad	I booked a local house for my tenants a family of 3 after a flood. A key worker had been using it for 3 months, it was not cleaned let alone disinfected for corona virus. They were there less than an hour and found dirty underwear, mouldy food & thick dust & grime. No refund whatsoever on a 5 night stay, absolutely disgusted, & I can’t leave a review on the house in Hindlip Worcester, please avoi…
1 star: Bad	Holiday booked in July for September with payment not to be taken 30days before start of holiday, 28 days to holiday payment not taken (I am so glad). Holiday showed confirmed on site, contacted number on website to be informed I was speaking with Manager at John Fowlers, asking how I got her number. I explained and advised someone will get back to me. The lady was polite however advised no vacan…
1 star: Bad	A very bad costumer service. I wouldn’t use them again.; A very bad costumer service. I wouldn’t use them again.
1 star: Bad	Pity i had to leave 1 star. Would never book through these cowboys again. Dublin hotel booked almost a year ago for 3 day break in April. Covid obviously closed the hotel but no refund. Passed from pillar to post. Will 100% fight this even if I have to go through court.; Pity i had to leave 1 star. Would never book through these cowboys again. Dublin hotel booked almost a year ago for 3 day break…
1 star: Bad	Do notuse this company due to coronavirus we had a London break cancelled on us by the hotel. They keep passing the buck to each other and still no refund this has been going on since March. These companies will fold people will remember this disgusting service and refusal to repay customers.; Do notuse this company due to coronavirus we had a London break cancelled on us by the hotel. They keep …
5 stars: Excellent	I had to sadly cancel my 4 week trip to Canada and America and with that, about 15 hotel bookings. Many were free cancellation but some were not. 3 hotels I would have to pay in full regardless of if I showed up or not. I requested the hotels waive the fee and two did so immediately. One dragged their feet massively and basically ignored my requests. I got in touch the Booking .com customer servi…
1 star: Bad	My 24 year old son booked an apartment for 1 night & paid £150 deposit. The hotel contacted him & said they wont accept his booking cause he's not over 25 but he can't have his deposit back! Booking.com didnt care & didnt help at all.; My 24 year old son booked an apartment for 1 night & paid £150 deposit. The hotel contacted him & said they wont accept his booking cause he's not over 25 but he c…
1 star: Bad	Book hotels and trips directly, do NOT use Booking.com. Their customer service email chat keeps saying Email not sent no matter what day or time I try. Of course even with my confirmation booking number and PIN their phone system doesn't recognise the booking. I am still waiting to get a refund for the May hotel booking that couldn't happen thanks to Covid. Booking.com make it impossible to conta…
1 star: Bad	Really upsetting Booked to stay at the Brunel Inn in Saltash Cornwall for 3 nights from Tuesday 4th August. Drive for 4 hours to get to Cornwall, have a nice few hours in Newquay then head to the hotel absolutely exhausted to find the doors cobwebbed over, nobody inside. Call the number on hotel website to find its a chain of hotels and they have no booking for us. End up booking what's left in P…
1 star: Bad	I booked a room for me and my friend in London for the weekend. Thankfully my friend wanted me to call the hotel to find out about dropping off our bags before we could check in. You can imagine my surprise when I found out he hotel was CLOSED and had been closed for months. Two days before my trip I was booked into a closed hotel. The best I got was that I wouldn’t be charged my cancellation fee…
1 star: Bad	I booked a stay at the Bellagio with Booking.com and although the T&Cs clearly states that all fees are covered, the hotel charged me resort fees and taxes on top. This was 7 months ago and I am still trying to get the fees back from Booking.com or the Bellagio. The Booking.com customer service tried to stall my request by asking for more and more detailed receipts, which the Bellagio refused to …
1 star: Bad	Terrible experience with customer service. I was promised a refund, then customer service backtracked and blamed the hotel refusing my refund. Speaking to the hotel, they blamed booking.com. I purchased a 5* hotel and was moved to a 4* hotel on the day for the same price, no explanation, no apology, no refund. I will be raising a claim against booking.com for the poor service and a refund.; Terri…
1 star: Bad	I booked a 5 night hotel in Italy. Booking.com said it was available. When I booked, it said an error code. I tried again and now it said it was sold out. I check my account and they have taken out £900. They then emailed to say they would refund me but they refunded me £850 as they refunded me in euros so I was hit with transaction fees and exchange fees. So basically, booking.com said a room wa…
5 stars: Excellent	Can I just give a thank you to Alejandra A. in the Booking.Com Help Centre who had a look at our problem, tried to fix it then just took ownership of it, came up with plan B and resolved the whole whilst I was on the phone. What a star.; Can I just give a thank you to Alejandra A. in the Booking.Com Help Centre who had a look at our problem, tried to fix it then just took ownership of it, came up…
1 star: Bad	Up until covid I had relatively good experiences using booking.com. I had reserved a hotel via this service (INNIT ROOMS OCEAN BREEZE) for July with a free cancellation policy and no prepayment - When everything shut down in March, the hotel took the full value of the booking in early April - when I cancelled at the end of April, I got an email saying it will take up to 2 months to issue a refund…
1 star: Bad	Up until covid I had great experiences using booking.com. Alas when everything was shut down due to covid in March, I knew I had to cancel my booking in May. I needed up calling booking.com and they were unwilling to help with my cancelation and were going to charge me a large fee for canceling. I ended up contacting the place I was suppose to be staying directly to help out, 5 months after deali…
1 star: Bad	I have emailed Booking.com and Iliada Suites in Naxos many times regarding my refund. Our flights to Greece were cancelled in June. The accommodation wishes to keep my money for up to 2 years before they will refund it. I have sent proof that my flights were cancelled and no one will respond.; I have emailed Booking.com and Iliada Suites in Naxos many times regarding my refund. Our flights to Gre…
1 star: Bad	Absolutely appalling to deal with. They do not answer your emails, held onto a deposit that the holiday let refunded!! Do not use, they are dreadful!!; Absolutely appalling to deal with. They do not answer your emails, held onto a deposit that the holiday let refunded!! Do not use, they are dreadful!!
1 star: Bad	Absolutely awful and completely unhelpful. Made a booking fine. Then the hotel called to cancel my booking after the booking.com deadline for free cancellation. I cannot get my money back. There is no contact number and the only way to contact them is by email. Hotel unhelpful. Booking.com unhelpful. I don't see why I have to take the hit financially when the hotel made the cancellation; Absolute…
1 star: Bad	Absolutely appalled at the fact I've had to pay a cancellation fee to cancel my booking during a global pandemic. Booked the hotel for the night before wedding get together, however the wedding venue went into liquidation losing me £7k! Then this - This is just another hit to the working class pocket. I'll never use booking.com again; Absolutely appalled at the fact I've had to pay a cancellation…
1 star: Bad	Low standards at customer services. Unable to answer simple emails about re confirming a cancelled booking by mistake. Luckily the venue is happy to keep the space and I can still attend. Booking . Com emailed them twice with all the details they requested and information on why I needed this reinstated. All they replied was asking for the already given details of the booking 2 times!! They still…
1 star: Bad	Hotel canceled our reservation. I wrote to the support and called the international number. Promised to find another accommodation and return the difference in price. And that is all. No one has sent alternative proposals. The hotel on the site cancels an already confirmed reservation. New offers are not sent.; Hotel canceled our reservation. I wrote to the support and called the international nu…
1 star: Bad	Dreadful customer service - accommodation that we stayed in booked through them was grim . Provided photos as requested and they will do nothing ! Complete waste of time . Selling awful places to stay and then not bothered when you complain . Will never use them again and will be taking my complaint further ..... AVOID AVOID AVOID; Dreadful customer service - accommodation that we stayed in booke…
1 star: Bad	Booked a Hotel and it stated £89, literally by the time I got through the next page to finalise my booking and I had paid, It stated in small that the booking was for £100. I used to always use Booking.com but they are now resorting to underhanded tactics to try con people. Luckily I had chosen the free cancellation option and was able to cancel. I phoned up and argued with the operator on the ph…
1 star: Bad	If I could leave 0 star I would as Booking.com's customer service appears non existent when you need it. It ws stressful trying to cancel a reservation the height of the pandemic as the flights to the local airport were cancelled by the airline so it was not possible to take up the reservation. Booking.com were of no help at all.; If I could leave 0 star I would as Booking.com's customer service …
1 star: Bad	I used booking.com to book a self-catering property in the UK soon after COVID19 lockdown restrictions were eased. On arrival, we found food staining on the ceiling, smears on worktop surfaces and kitchen appliances, dirty cutlery, crockery, glassware and appliances. Chewing gum had been left behind kitchen taps. A glass fragment cut my foot during the night, which bled onto the floor. There was …
1 star: Bad	I had booked a b&b in belfast on Tuesday when I arrived I was unable to get into the property there was a code on the door tried to open it with the pin code I was given and it didn't work. I ended up having to book another b&b. I was at one point standing on the street crying I was on my own a very bad experience. Tried contacting booking. Com to no avail I was scammed out of my money. Don't use…
1 star: Bad	There is absolutely no customer service. I am a villa owner and agreed to a cancellation of a guest in June, (we had not received any payment for the booking as booking.com retained the card details and presumably the payment. ) When they issued an invoice for £1375 of commission I immediately contacted them and followed the laborious procedure of disputing the invoice as obviously the guest had …
1 star: Bad	Just a complete joke , their customer service is the worst on the planet. They should start offering minus stars for reviews so people can use those, 1 star is way to much for these muppets.; Just a complete joke , their customer service is the worst on the planet. They should start offering minus stars for reviews so people can use those, 1 star is way to much for these muppets.
1 star: Bad	Horrible customer service. I am a host and have used this company for over 2 years. Thousands of dollars in commission. We recently had a nightmare guest that cost me over 900 in damages. Booking.com is doing NOTHING. Saying that the guest said they didn't do it. They do not return messages. Do not take damage deposit and take a very large commission. I am done with you booking.com. Will try out …
1 star: Bad	False advertisement of free cancellation. Total scam of a website. Will never ever use again; False advertisement of free cancellation. Total scam of a website. Will never ever use again
1 star: Bad	I booked a hotel 5 hours before my son was supposed to arrive, the hotel told him he couldn't check in because he was 20 and not 21. Legacy Vacation Resorts - Reno and Booking.com would not refund our money for the reservation. DO NOT RECOMMEND Booking.com or Legacy Vacation Resorts - Reno; I booked a hotel 5 hours before my son was supposed to arrive, the hotel told him he couldn't check in beca…
1 star: Bad	0 stars for booking.com , absolutely awful due to travel to Kos in September, our flights cancelled due to COVID, booking.com are refusing to refund & putting blame onto the villa we booked, we booked it through booking.com they are saying we need to contact the property. Will never ever use booking.com a again, I use them several times a year for hotels etc...; 0 stars for booking.com , absolute…
1 star: Bad	WE WILL NEVER USE BOOKING.COM AGAIN! Very disappointed with how the deal with Covid situations. Feel like they partner with crooks and do as little as possible to help customers. No proper Complaint procedures. We booked our holiday to Greece long before Covid happened. One of the accommodation is in Naxos, Rita's Blue dreams, (turns out Rita's Blue Nightmares). Our flights to Greece in Aug was c…
1 star: Bad	I have just spent an hour finding this option to write a review, and it still isn’t going toward the last motel I stayed at? The Review option on the “booking.com” app states “you have no reviews” but gives you NO OPTION to make one. I wish to make a complaint about the last place I stayed at through this app, but I wish to name the motel on the app! Tell me , how do I make a complaint that other…
1 star: Bad	I booked in January 2020 through booking.com to stay at the Gallivant NY in August 2020. I paid $1,535 Australian Dollars upfront, bad mistake. Due to Covid-19 i cannot leave Aust. If I had cancelled under any other circumstances I accept it's my problem. We are however in the midst of Pandemic. I have contacted booking.com and The Gallivant many times only to be given th ed run around, promises …
1 star: Bad	It is shocking what this company is doing. I would suggest that you write to Rip Off Britian like I have as they think they are not accountable but at least they will raise awareness what this company is like. Another option is the chargeback method with your bank under the Consumer Credit Act. Also complaint to the Financial Ombudsman as they will also look into this matter.; It is shocking what…
1 star: Bad	Awful company, not ABTA protected. After our flight was cancelled to Spain we were told we could not have a refund on our villa as 'there are other ways to get to Spain'. Safe to say I along with many others will never use these thieving clowns again. I hope they go out of business and get what they deserve.; Awful company, not ABTA protected. After our flight was cancelled to Spain we were told …
1 star: Bad	Awful disgraceful do not use! Do not expect any customer service or refunds to be made in a professional manner. They have ruined my holiday and waste so much of my time just because they are incompetent and useless. Strongly recommend to use other alternatives when booking hotels or holidays. They weren’t able to find an alternative accommodation when our hotel was cancelled and I was told to bo…
1 star: Bad	I've been trying to contact the support center. Speaking 4 languages I tryed with many different numbers/countries but it's always the same. They put you on hold forever... This is not what you expect from such a big company!; I've been trying to contact the support center. Speaking 4 languages I tryed with many different numbers/countries but it's always the same. They put you on hold forever...…
1 star: Bad	If I could give this company 0 stars I would! We were due to travel to Spain in May but due to COVID our plans were cancelled. After numerous emails we still have not received refund fir the property we booked. Booking.com blame the property and even though we booked it through them they are saying that WE have to contact the property!! Spoke to them in July again and they said the property were …
1 star: Bad	Sooooo bad. I can not believe how bad booking.com is. Between booking.com and the partner hotel I have waited since April for a refund it is now August !!! I have asked for the complaints procedure 9 time’s and I am ignored, I just go round in a continuous loop of the same email. One reply I did get was so rude and unprofessional. I had explained I needed the refund due to financial hardship over…
1 star: Bad	This company does not have an independent process by which you can contact them in a well informed manner. You provide them with factual evidence, but the reply you receive is the same spurious reply you've been receiving from the accommodation that have overcharged you. We have used Booking.com on numerous occasions and we are Genius Level 1 customers, but it counts for nothing when you raise an…
1 star: Bad	I have booked and paid my flight on booking.com. After I have waited for 72 hrs without any reservation received I called and asked about my tickets. Nothing has been reserved by booking.com. I bought a new ticket instead. Never again booking.com!!!! booking.com is a really piece of ...; I have booked and paid my flight on booking.com. After I have waited for 72 hrs without any reservation receiv…
1 star: Bad	Disgraceful company just had an email with less than 5 days to go our holiday had been cancelled due to being double booked i have attached email. We are very sorry to inform you that your holiday at Croftlands Court will not be able to go ahead and has been cancelled. Extraordinary booking volumes have caused issues in our IT systems, which in turn have led to some duplicate-bookings occurring. …
1 star: Bad	We were partnering with booking.com. THEY ARE THE WORST COMPANY TO WORK WITH, THEY STOLE OUR MONEY AND COVERED IT UP THROUGH THE SYSTEM. They lowered reservation prices - every other reservation price was lowered (some 4 euros per night and one even 80 eur/night). They also activated 10% discount on our reservations WITHOUT US EVER KNOWING and when we saw the prices change that much we called the…
1 star: Bad	Liars. Refund promised yet three months later still waiting. All you get is copy and paste type responses.; Liars. Refund promised yet three months later still waiting. All you get is copy and paste type responses.
1 star: Bad	I booked an accommodation for holiday via booking.com and I suggested my friend the same holiday option. My friend booked thought the lodge website directly, same dates, similar rooms/lodge. I received a confirmation email of accommodation immediately. Only a week before the travel date, booking.com message me saying that my lodge cannot accommodate my booking. My friend's accommodation still sta…
1 star: Bad	Terrible. Will never use them again. Had an accomm booked for May 2020. They took our money then deleted the booking from our app. Liars and cheats.; Terrible. Will never use them again. Had an accomm booked for May 2020. They took our money then deleted the booking from our app. Liars and cheats.
1 star: Bad	4 months later still not issued refund for a cancelled hotel stay in Norway due to national COVID quarantine by the Norwegian authorities. Neither their customer services department nor the hotel are responding to email. They also charged me £50 extra on what was quoted on their website which I don't think is justifiable by the exchange rate. Please, don't book your hotel stay through this agent …
1 star: Bad	Can't belive i had to give it 1 star in order to write a review. Well me and my partner booked a well needed break with our 2 kids at the Woodley Hotel Blackpool for a weekend through booking. Com... What a mistake. Thay should not be aloud to promote hotels that are not fit for staying as it was a total hell hole. No hot water all weekend.. Stained bedding and walls that looked like human fecees…
1 star: Bad	Remember this isn't a democracy. Booking.com protect their partners and allow them to cancel anyones booking at zero notice with no penalties, but if for any reason you have to cancel you'll foot a hefty penalty. Highly, highly recommend using a company that protects consumers rather than partners.; Remember this isn't a democracy. Booking.com protect their partners and allow them to cancel anyon…
1 star: Bad	In 2018 I stayed at the Nora Club Hotel in Pula, Sardinia. I wrote a pretty damming review of this hotel which Booking.com initially printed. From the review 6 other readers said it was helpful. Obviously Booking .com not wanting to lose bookings for this hotel decided to remove the review completely. This leads me to ask the question "How many reviews have Booking.com removed in order to get sec…
1 star: Bad	Disgusted with these jokers and will be closing down my account today. I booked a weekend stay through them and paid with the debit card I always use. I then got an aggressive message from booking.com telling me there had been a problem with my card and payment hadn't been made. This obviously made me panic, thinking my card had been compromised and my hotel booking wouldn't stand. All the reason…
1 star: Bad	We travel frequently and have always booked with booking.com. Twice in the last 2 years, our credit card was compromised immediately after a holiday. In 2018, it was after a trip to Europe; and last month (Jul 2020), it was a trip to north-western Australia. For both of these trips, we used different services for airlines, car rental companies, etc - the only common thing is booking.com. In betwe…
1 star: Bad	Absolutely rubbish customer service!! I booked with booking.com after the lockdown was lifted, but the apartment (The Steel house) Sheffield, it was grimy and dirty, I reported it to booking.com 3 times and they couldn't care less, said it's not their problem. That apartment is a COVID-19 health risk, there were people in the night before us and it clearly hadn't been cleaned, I have the pictures…
1 star: Bad	Never ever again will I book a holiday with booking .com , booked holiday back in February 2020 but due to covid 19 restrictions on travel couldn’t make the trip . Emailed and rang booking .com and told them this they said there was nothing they could do and that I was going to loose deposit for holiday and then put a deadline in May that I had to pay full amount even though country was in lockdo…
1 star: Bad	I will do zero stars. I will NEVER use BOOKING.COM again! I booked a room in Nashville for two nights for March 2020 back in December 2019. BOOKING.COM or the hotel cancelled the reservation without explanation. Almost $400 was paid to BOOKING.COM. My bank and I have continued to try to get a refund with no resolution - 8 MONTHS now.; I will do zero stars.; I will NEVER use BOOKING.COM again! I b…
1 star: Bad	Do not under any circumstances use booking.com. RIP off merchants that do nothing for you. Their customer service do not know the system and give you incorrect information. I’ve had countless problems with them that should have been easy to rectify. Hours and hours of phone calls every night whilst in business. Don’t do it ??; Do not under any circumstances use booking.com.; RIP off merchants tha…
1 star: Bad	Very bad customer service, unable to help when cancelling a hotel, after the flight has been cancelled due to coronavirus. Instead book with EXPEDIA, they are so much more helpful. There customer service agents have poor english, keep hanging up and lie, luckily i took screenshots to prove this. I WILL NOT BE USING THEM AGAIN!; Very bad customer service, unable to help when cancelling a hotel, af…
1 star: Bad	I booked a hotel in Italy. Had to cancel because of the covid 19. I contacted booking. Com. They said they will sort things out and if i didn't receive the money back from the hotel booking. Com would pay my refund never received a penny back. Booking. Com are nothing more than a bunch of lying thief's never going to use them again pure scum; I booked a hotel in Italy. Had to cancel because of th…
1 star: Bad	Booked Grand Hotel Scarborough what a disaster arrived Friday 31/7/20 had to wait outside in a queue for 2/30 hours to check in No one came out to offer any explanation or offer water as it was a very hot day there were children and elderly people in the queue it was very upsetting and when asked if we could use the facilities we were told no the staff was rude and didn’t have a clue finally got …
1 star: Bad	Booking.com cancelled my booking and never refunded me, then they lied deliberately to gain time and never paid. I booked an hotel in Rome through booking.com in March 2020. I was told the hotel was closed due to the lock-down in Italy in March, and that I would get a refund. Since then, booking.com and the hotel have been refusing to refund me. I've contacted Booking.com by phone on March 24th, …
1 star: Bad	We booked a three night stay in a two bed apartment in Belfast. We specifically wanted a two bed place so my 1 year old could have her own room as she does at home and would settle easier. We've stayed in hotel rooms with her before and she doesn't settle as easy. A half hour before we were due to check in and after travelling for 150 miles we rang to arrange collecting the keys to the apartment …
5 stars: Excellent	I had a non-refundable hotel room booked in Prague and then lockdown hit. The hotel were being very pushy about me taking a voucher, so I contacted booking.com who confirmed that their policy was for all bookings to be refunded due to Covid-19. They emailed this to me in writing within 10 minutes which put my mind at rest. Booking.com dealt with the hotel directly from that point forward, they fa…
5 stars: Excellent	I have been reading all reviews, and amazed so many bad ,I have never had a problem ,always answered straight away, free cancellation so easy if needed ,I have used them so many times with no problem .i don't think it's all down to luck .; I have been reading all reviews, and amazed so many bad ,I have never had a problem ,always answered straight away, free cancellation so easy if needed ,I have…
1 star: Bad	After arranging time off work and deciding on treating ourselves to a hot tub suite at a hotel we booked the room a week ago for a stay on 21st August. Today the hotel phoned me and told me they don’t have a room and bookings.com have only today let them know about the booking. Absolutely ruined our one break away after lockdown and having saved for this treat. We can’t take another date off in t…
2 stars: Poor	1. Customer support sends generic email templates, and don't take the time to answer your question(s). 2. There isn't an option to enter a coupon code on their website, which makes for lousy user experience. 3. Bad UI/UX design. The design of the site and app is too crowded. Content isn't appropriately arranged and makes it hard to find information about the property. I booked a stay and the room…
1 star: Bad	Do not book with this site. Booked an apartment stay through them.... never ever again..... I have given them all my card details received pins for booking and no confirmation email ..... have been fighting with them over this for 5 days ..... I will be charged for this booking that I want to cancel As one of the party Who was going is terminally ill ... customer service is appalling ... my advis…
1 star: Bad	Do not book with this site. Booked an apartment stay through them.... never ever again..... I have given them all my card details received pins for booking and no confirmation email ..... have been fighting with them over this for 5 days ..... I will be charged for this booking that I want to cancel As one of the party Who was going is terminally ill ... customer service is appalling ... my advis…
1 star: Bad	Made a booking, received all confirmation through email, have arrived to the hotel at 10pm “sorry can’t see your booking on my computer contact Booking.com it is not our problem “. Contacted booking.com their said they will contact me in 30 min and will try to sort it out, now two days gone and still no one contacted me...; Made a booking, received all confirmation through email, have arrived to …
1 star: Bad	looking at the reviews I can only think this company don't take reviews serious enough. I booked a one night stay at culloden Hotel County Down after four months lock up my partner and I decided to get kids minded and go for it so we booked it on Thursday booking confirmed 268pounds lot of money for one night but thought be worth it so set of on out journey arrived at hotel 6 30 pm gave ref numbe…
1 star: Bad	Totally appalling customer service. Booked a holiday for 4 people from mobile phone for the online confirmation to confirm the booking was for 2 people. Cancelled immediately as I thought I must have done something wrong (tried changing to 4 people but option was greyed out) and tried to rebook. Wouldn’t let me from phone so had to pay an extra £100 to secure the booking on my desktop. Contacted …
5 stars: Excellent	Since I used booking.com many years ago, I have seen lots of impressive improvements such as booking taxi in the destination with very reasonable prices and more.; Since I used booking.com many years ago, I have seen lots of impressive improvements such as booking taxi in the destination with very reasonable prices and more.
5 stars: Excellent	We have just returned from a fab staycation in Bridport. We booked Southcroft apartment. Very clean and fresh ..everything you need is here and more. Far more provided than any self catering we have stayed in previously..much appreciated too.. Short walk to towncar ride to Westbay Lulworth cove lovely..Durdle door breathtaking. Hand sanitiser at all points in these apartments brilliant Perfect ho…
1 star: Bad	It gives good prices yes, their customer service is horrible, first they sent me to wrong hotel second they won't answer calls, they had me on hold 15 minutes then hung up on me. I want to cancel rest of my stay, but can not or I will pay regardless I stay or leave, nobody too talk to. Hotel can not cancel it, because it's a 3rd party booking. You save on room but pray everything is precise other…
1 star: Bad	DO NOT USE TAXI TRANSFER SERVICE - leaves you high and dry at the airport. I pre-paid for a transfer through booking.com to pick me up at Innsbruck airport. They cancelled with NO NOTICE and I only found out when I landed. Stuck having to use very expensive airport taxi. Lost £75. Customer service not responsive; DO NOT USE TAXI TRANSFER SERVICE - leaves you high and dry at the airport. I pre-pai…
4 stars: Great	I would like to be able to set a date range for accommodation, and see all available date intervals within this range. E.g. I choose Aug 1 - Aug 20, and the system shows me that Bob's Hotel has a specific room available from Aug 2 - 4, and Aug 12-19. The way it works right now, I have to manually flip through every single interval and it doesn't always show. Besides, it resets all set filters eve…
1 star: Bad	I booked a hotel through booking.com and had a horrible experience. I will never book through them again. The hotel room was listed as a premium option. When we arrived, they did not have a room for us and instead asked that we wait while they prepared a room. When they finally brought us to a room, there were 2 maids cleaning but it looked like a filthy construction zone. First, the hotel did no…
1 star: Bad	Reserved the property titled “modern house in Davidstow “ and received confirmation of booking . 2 weeks later booking is cancelled without explanation. Poor communication from booking.com and poor customer service . Booking.com only informed us it was cancelled and unclear what had happened re Pre payment (I subsequently found out we had not been charged but had to contact credit card company . …
1 star: Bad	Another poor company holds on to your money,Hotel cancelled on 6/7, email said money refunded 5 to 7 days after numerous emails it seems now will be reunded first week of september.As a customer on Genius 2 loyalty programme pretty poor .Time to book hotels direct .; Another poor company holds on to your money,Hotel cancelled on 6/7, email said money refunded 5 to 7 days after numerous emails it …
1 star: Bad	Please do Not use Booking.com. You are better off calling your selected hotel directly. I had a bad experience recently with getting a refund (due to Covid 19). I called Booking and the sent a cancellation notice to me that stated my reservation was definitely cancelled. However, I was still charged. The hotel had to go through extra hoops to clear this up for me. Thank you to them. I will never …
1 star: Bad	Another ignorant company that fails to show any responsibility. Contacted 4 times and each time you get a computerised message back stating someone from customer services will contact within 24 hours, nothing happens. Company run on unprofessional staff, ignorance and incompetence. In today's current market you would think they would be bending over backwards to help and for the custom,; Another …
1 star: Bad	If I could give zero stars I would. Shocking customer service. Hotel was terrible, a generous 2 star not the 4 advertised, we checked out having been in the hotel less than 12 hours and have asked booking.com to refund us the nights we didn't stay. The hotel said they would be happy to offer us a refund but as we had booked through a third party we needed to go through them (booking.com). I sent …
1 star: Bad	Old Grey Hotel boston The accomodation is NOT A HOTEL. It is in an Industrial estate. It is a false description. IT is not Covid Safe. ... Sheets bedding not changed. No procedure in place for compliance, Customer Service is Poor. Paid for breakfast not available. Booking .com should be checking the quality of the accomodation before advertising and ensure safety of customers.; Old Grey Hotel bos…
1 star: Bad	This company should be given zero stars. As a home owner I hosted my place to guests which they trashed and i had to pay over $2,000 dollars in repairs, booking.com sent me a sorry message and asked me to wait for the guests to pay me back. So in the end its up to the guests if they want to pay me back. As a home owner do yourself a favor and don't host your property here, go to another company.;…
1 star: Bad	made a booking was everyhthing ready to go even packed the car and received email from the property saying no longer available. bookings.com said if i book another they will mach the price of my previous booking, jusy spoke with then and they said won't refund as it is in diferent dates. only one day, thats is a joke avoid then.; made a booking was everyhthing ready to go even packed the car and …
1 star: Bad	DO NOT book Above property as owner would not refund due to covid , and booking .com as done nothing .; DO NOT book Above property as owner would not refund due to covid , and booking .com as done nothing .
1 star: Bad	BEWARE.This, ATROCIOUS DISHONOURABLE COMPANY,is connected to Hoseasons,and IFFILIATE Partners Countrywide Park Homes, Exclusive Luxury Lodges, Luxury Lodges.These, Companies should be AVOIDED AT ALL COSTS..; BEWARE.This, ATROCIOUS DISHONOURABLE COMPANY,is connected to Hoseasons,and IFFILIATE Partners Countrywide Park Homes, Exclusive Luxury Lodges, Luxury Lodges.These, Companies should be AVOIDED…
1 star: Bad	Zero stars. I tried to book a hotel room. After submitting my credit card to finish transaction the room was not available, however my money was taken out and not available on my card. No customer service , just an automated phone service where you need to use a confirmation number which I DID NOT HAVE. After emails for days with headquarters (?) in AMSTERDAM? I finally had the charges reversed a…
1 star: Bad	Awful, awful company. I understand it has been a pandemic so times have been difficult, however putting hotels/apartments with very little information regarding being able if you are stay there or not is unacceptable. Me and partner booked Ellison Hall through this site, got denied access by the property due to ‘not being from the same family’ even though I have lived with my partner since the st…
1 star: Bad	no customer services properly and also no proctection refund within 7-12 days what a joke?; no customer services properly and also no proctection refund within 7-12 days what a joke?
1 star: Bad	They are happy to take the booking and your money but leave you high and dry when you need to cancel/ contact the hotel. I understand this year has been a challenge but they had very poor communication and told us for both hotels we had booked it was our responsibility to contact the hotel directly. Very very poor! Would serious consider never using their site again!; They are happy to take the b…
1 star: Bad	Don't trust this company They take bookings knowing the hotels are closed which is fraudulent, they send there customers to dirty, filthy hovels where you could get Covid19 They have no interest when you make a complaint over the service and support there actions and support hotels that should be closed down due to being a health risk I had to cancel my own booking due to being informed that the …
1 star: Bad	Shocking co Pant that should be shut down in my opinion! They sell you accommodation that is NOT available, confirm it by email, do not confirm it with the hotel so you are left without no booking’ - then when you cancel they try to charge you or refund you 12days later with ‘fees’!!! Miss-Selling at its best, do not use this firm!!!; Shocking co; Pant that should be shut down in my opinion! They…
1 star: Bad	My hotel was cancelled back in April due to Covid. I can not tell you how many times I have emailed for a refund or even a booking.com credit voucher. Every time it is the same response. To contact the hotel directly. Which I have many many times but again no response. As far as I am concerned booking.com took my money so its down to them to refund the money not the hotel. I've tried to phone but…
1 star: Bad	Awful. They have no control over accommodation. They won't help you if you contact the customer service. Do not use it - terrible experience; Awful. They have no control over accommodation. They won't help you if you contact the customer service. Do not use it - terrible experience
1 star: Bad	I had to cancel a hotel in Italy due to covid. I had free cancellation until July 9th. I cancelled on Jun 26th when our flight was cancelled. We had paid a deposit well before covid was a blip on the radar. After canceling we didn't hear anything about a refund of our deposit. I contacted booking and they said to contact the property. I contacted the property with zero response. I went back to bo…
1 star: Bad	Booking.com did not back me in a dispute with a hotel that did not provide me with a room which was not refunded for a 2 night booking that was paid in full because of a DISAGREEMENT that the owner CLAIMS I was threatening which was a total lie, going back and reading the reviews on GOOGLE REVIEWS there is a clear pattern in the dishonest ownership on how they RIP people off and sites like BOOKIN…
1 star: Bad	PLEASE DON'T BOOK WITH Booking.com YOU WILL LOSE OUT.....DON'T BOOK and hopefully they will go out of business; PLEASE DON'T BOOK WITH Booking.com YOU WILL LOSE OUT.....DON'T BOOK and hopefully they will go out of business
1 star: Bad	Booking.com Stands out for Scamming.com I have booked a little budget holiday for my family. I booked an apartment called the "Mazed service Apartment". The owner was very very rude and was not very helpful. Booking.com was trying to be helpful but was unfortunately not able to help me. I noticed that the apartment was on top of a pub (we are muslims). I put in a cancelation request and after I p…
1 star: Bad	Booked a hotel through booking.com for May. The hotel was closed at the time of my booking and therefore my booking was not fulfilled. I tried to contact the hotel directly and have been ignored. They then messaged and told me to contact booking.com which i have done and I am now being ignored by them. So my money has basically been stolen.; Booked a hotel through booking.com for May. The hotel w…
1 star: Bad	Booked cottage with Booking.com, credit card details accepted confirmation email recieved but the next day I get a telephone call telling me no availability and my booking not actually confirmed. About 30 mins later I get another call telling me the cottage is actually available, but can't explain why original booking not successful. What a waste of time. Not sure if this is incompetence or fraud…
1 star: Bad	I recently booked a property through booking.com for a short break. We arrived at the property and couldn't gain access, we rang the phone number that we were given no answer and the pin code didn't work. We eventually spoke with the gentleman who knew where the owners of the property lived. Unfortunately she didn't have a spare key do she gave my husband some tools to break the key box. We unpac…
1 star: Bad	Booked an apartment in good faith for our 3rd year anniversary. Had saved up the spare cash as due to current pandemic one of us was made redundant. 6 hours later the Apartment owner messaged to say the system had messed up and it was already booked. He had cancelled the booking. Booking.com state they have issued a refund for the £120+ we had paid. However it will take 12 working days to get bac…
1 star: Bad	I have had a really disturbing experience with Booking.com for Confirmation # 3627273666 I arrived onsite to find no place to sleep for 2 of our number and I didn't sleep the whole night, staying with Booking.com Customer support Team for almost 2 hours, and finally they send me the message We followed up with Pyramids Porto Sokhna Sea View Apartments. Unfortunately, no compensation can be provid…
1 star: Bad	I DON'T WANT ANYTHING TO DO WITH BOOKING.COM FOR AS LONG AS I SHALL LIVE!!!!!!!! HORRIFIC CUSTOMER SERVICE, FROM ARROGANT, USELESS STAFF. Could their app get ANY WORSE?????? Cannot believe how horrific this company is. Still waiting on my refund and absolutely gobsmacked at the lack of communication!!!!!!!!!; I DON'T WANT ANYTHING TO DO WITH BOOKING.COM FOR AS LONG AS I SHALL LIVE!!!!!!!!; HORRIF…
1 star: Bad	Disgusting disgusting disgusting absolutely speechless how they do not protect their customers stealing endless momey; Disgusting disgusting disgusting absolutely speechless how they do not protect their customers stealing endless momey
1 star: Bad	DO NOT USE! DO NOT USE! DO NOT USE! After booking a small getaway to Cornwall in May for the end of July for myself my partner and my two children for my partners birthday via booking.com. Thought everything was okay until receiving an email from the accommodation a week before our arrival date advising us that booking.com had not only double booked but overbooked four times!! And was told we had…
1 star: Bad	Booking.com should check every hotels or apartments theyre recommending. I booked 16 nights at almanza metropolis, las pinas and the experience is terrible. Checking in is terribe. All the things are old and dirty. The sink is stinky. The toilet is dirty. Beddings are dirty. Everything is dirty. Poorly maintained room. Never recommend this place again!; Booking.com should check every hotels or ap…
1 star: Bad	I booked a property back in January for a 4 bed house in Bristol for my son's wedding through booking.com for this August. With the coronavirus the wedding had to be cancelled and so on 10th May, I checked my booking with booking.com who told me I could cancel the booking at any time. However minutes after cancelling I received an email to say it was a non cancellation booking and I would not get…
1 star: Bad	I had a booking which I cancelled via the app. The day of the booking I receive an email from the hotel saying I am a no show. I contacted the hotel saying that I cancelled the booking and they told me they weren't notified. I called booking (twice) to resolve the problem and told me that I hadn't cancelled the reservation. I told them I did it and that is why it wasn't shown as an active booking…
1 star: Bad	Flights cancelled, travel ban between Japan and Kenya until the end of August. Asked for my hotel booked for 8th to 23rd August to be refunded as can't travel and the third party Bedsonline are approving refunds. Agent 1 asked for government website to confirm travel ban - sent Agent 2 - asked for flight cancellation confirmation - sent Agent 3 - advised my booking basic booking is non refundable…
1 star: Bad	Some strange person consistently uses my email for their bookings. I receive a lot of messages each time it happens. And I don't have any means to stop this. So I conclude this business is not mature yet. First email must have a link, which I can click and say it is not me who initiated this. I as a spam receiver should be able to stop this flow by one click. But Booking.com did not provide this,…
1 star: Bad	Booking.com stole my families holiday! Sent an email on the friday asking us to pay by 13.00 the following Monday. Sent another email on the Sunday saying because we hadn't paid our booking was cancelled. Wife 8 months pregnant in tears, several hours online chat and an hour actually speaking on the phone got us nowhere. Trying to rebook with 3 weeks to go outrageously expensive. I would give min…
1 star: Bad	WILL NO LONGER USE, I have used booking.com for years and have never looked at their reviews, I expected to be getting a good deal. Not the case!!!! I recently booked a hotel in Blackpool (through my booking.com account) for 7 nights and was happy with the price. My wife (who had never used them) then used her work computer and got a price £50 cheaper but it also included breakfast for 4 people f…
1 star: Bad	Sat in my hotel room at the CONFIRMED price of €61.30 but charged €81.70 on arrival! None of the advertised facilities available, no restaurant, no bar, no kettle or refreshments in the room, no spare pillows. The air con doesn’t work. The hotel blamed booking.com for the cock-up in the price. Won’t touch Booking.com or Campanile again.; Sat in my hotel room at the CONFIRMED price of €61.30 but c…
5 stars: Excellent	Fantastic customer service! Had a non-refundable payment with a hotel in Wales... then Covid19 arrived, and our concert was cancelled, so our booking was now pointless. Contacted Booking.com, and low-and-behold, they got 75% of my money back for me, which I think is marvellous, as the hotel was not closed during the time we wanted to arrive (they were taking bookings). Definitely going with Booki…
5 stars: Excellent	Despite all the bad reviews I decided to book anyways. Almost all of the complaints were about cancelling the reservation, trying to get the money back, or other things that involve customer service. Since I was sure that I wouldn't cancel my reservation I booked a hotel for 7 nights in my own country. I have had zero issues with the booking and the hotel was just as expected.; Despite all the ba…
1 star: Bad	Booking.com does not inspect the property it advertises. You have property that advertise in Montenegro on the golf course,private beach,tennis courts,horseback riding. There is no golf course or private beach in Montenegro. Hotels can use false and deceiving advertisements. They get your credit card info and bill you. When you arrive you are stuck with the bill. Booking sends you an email that y…
1 star: Bad	Should have read the reviews before I booked. I wanted to book a hotel in London and I could have booked directly with the hotel for the same price but I believed I would be safer booking with booking.com so that I had them with me incase anything went wrong. Well COVID-19 hit and I needed yo cancel, the hotel ignored me and I turned to booking.com and they just said through their online system “…
1 star: Bad	They have disabled my account with my bookings inside without any notice. I'm calling them to have explanations and clarifications but they don't answer. What a shameful company!!! Regards Andrea Orsini; They have disabled my account with my bookings inside without any notice. I'm calling them to have explanations and clarifications but they don't answer. What a shameful company!!! Regards Andrea…
1 star: Bad	Worst costumer service ever experience none existent completely useless; Worst costumer service ever experience none existent completely useless
1 star: Bad	Booking.com despite complaints, acknowledgments, and promises continues to mislead customers by advertising properties incorrectly. They then, despite damages and negative impact on paying customers, deny responsibility. The hotel also had cancelled on us and yet despite a promise not to charge, the charged us the full price and yet refuse to return the money. Booking.com promised to take care of…
1 star: Bad	This company wipes their hands if anything goes wrong with your accommodation. I was told to contact the Lodge owner myself to try and get a refund. They are happy to take my money but don't want to know when things go wrong. The lodge we had booked was not cleaned or sanitised before our stay we only found out we had slept in dirty bedding after 1 night when the cleaner turned up to finally clea…
1 star: Bad	I will never use Booking.com never again ??there's no words to explain there is no options on website account to change dates or amend the booking... There's no sympathy they still living on stone age and did not adapt because COV19 ?? I will never use Booking.com again never ??; I will never use Booking.com never again ??there's no words to explain there is no options on website account to chang…
1 star: Bad	This company is a absolute joke daughter booked the Royal Hotel at newcastle the advert was 2 double beds when they got there they were put in the attic they had to duck down as they over 6ft tall kids had no option but to check out and book another hotel with these crooks booking.com who may i add are refusing to refund the falsely advertised royal hotel be warned this company should be shut dow…
1 star: Bad	Booked and paid a hostel in Tallinn, Estonia on September 1st, 2019 for July 19th 2020 with booking.com. Due to Corona travel restrictions with cancelled flights, closed borders and cancelled event I asked for either refund or reshedule to same date in 2021. I did not even get a reply, neither by booking.com nor by EHE Hostel in talllinn. Very poor behaviour and for shure I will never use booking…
1 star: Bad	Poor customer service. I rent my cottage through this company and they've been unable to provide data analytics for my web page for 60% of the last 2 months! All I get are platitudes from some faceless customer service person. They address me as 'Partner', some partnership! Utter rubbish!; Poor customer service. I rent my cottage through this company and they've been unable to provide data analyt…
1 star: Bad	Awful website. They sent an incentive letter offering money off if I made a booking. I followed the instructions and made a booking which qualified and they have refused to provide the £90 cash-back incentive stating that I did not use the required link. I know that I did as I was careful to follow instructions. They replied that they can’t honour it as their link didn’t work. Totally unacceptabl…
1 star: Bad	The same experience as the most reviews I have been reading. Thieves for keeping the money during Covid even though we are not even allowed to travel. Short-sighted too. Will never even consider booking with you again and so are none of my friends, my FB buddies, my Instagram and Twitter followers.; The same experience as the most reviews I have been reading. Thieves for keeping the money during …
1 star: Bad	This company are a disgrace! I booked a break away on Sunday for 4 nights in Anglesey. Weds 22 july to sat 25July By sheer fluke I rang the hotel on Monday and they said they were closed. Owners words - I have told booking. Com several times we are closed, but they take no notice, that's the trouble when they operate from Malaysia they haven't a clue what goes on in Wales. After waiting hours to …
1 star: Bad	2 negative experiences close together Hotel booked in Germany Unable to travel due to Covid so believe cancelled through booking.com Surprised when some weeks later hotel charge our card for no show (despite knowing that Germany closed to tourists at the time) Booking.com not interested in pursuing matter on our behalf 2nd - ongoing dispute Booked b&b Keswick and arrived to find we had been cance…
1 star: Bad	Booked an hotel ages ago: the hotel appeared to be closed and I warned booking.com over 2 months before arrival date to alert them. They were unsuccessful in contacting the hotel however in the end the closed property agreed to pass the resevation to a nearby hotel. I thought the matter was closed instead I got a missed call from Croatia followed by an email proposing another property instead ...…
1 star: Bad	I travel a lot and host my cottage with booking.com. On the whole it’s been ok but when things go wrong you can measure a firm. Had a cottage in Rhodes it had sewage, no screen for privacy to sleep and the advert says 2km to beach when I’m truth it’s 10km and missing many features. With a live chat to the firm to ask for a release or transfer they refuse. Unable to sleep or use toilet I call, the…
1 star: Bad	Never use booking.com thieves and con artists stole money from me nothing but a run around trying to fix problems please as there is a God in Heaven never use or trust booking.com or motel 6 lost money because of them both; Never use booking.com thieves and con artists stole money from me nothing but a run around trying to fix problems please as there is a God in Heaven never use or trust booking…
2 stars: Poor	Not great tbh. Easy to book, but any problems and you're on your own.; Not great tbh.; Easy to book, but any problems and you're on your own.
1 star: Bad	What a joke!! The worst customer service I have ever experienced. I called booking.com early June about a booking I had made for a hotel in Athens for 2 July. My flight to Greece was cancelled due to Covid and we also couldn't travel due to restrictions put in place by the Irish Government. I was told to call back 2 weeks later to see if I could get a full refund. Then I was told to call back aga…
1 star: Bad	Today i was trying to get a solution for my reservation were booking.com misinformed or avoid to provide the procedure in how to find properties which accepts the money from the gift cards, this useless, lazy and very negative advisor wasn’t interested to find a solution because apparently its so hard to convince a manager that the platform, website and the app wasn’t giving the right information…
1 star: Bad	My recent booking with booking .com was an absoloute shambles. I arrived at the property at 23 30 ( having already arranged that i was on a late flight) to find i could not gain access. I contacted booking .com who said they would investigate and get back to me which they didn't. I was stranded in an area i was not famiar with, a female on my own. I was thankfully assisted by a security guard to …
1 star: Bad	Booked a year ahead for hotel which had to be cancelled due to COVID. Hotel itself agreed to refund the cost back to Booking.com but Booking.com refused to pass back to cost and kept my money. Do not use this booking agent.; Booked a year ahead for hotel which had to be cancelled due to COVID. Hotel itself agreed to refund the cost back to Booking.com but Booking.com refused to pass back to cost …
1 star: Bad	booking cancelled due to not being able to leave the country during the lock down and Booking.com wont even answer my emails. My insurance wont pay up as they say that Booking.com should and if they won't i should get that in writing however Booking.com wont answer me so its a ridiculous circle. Its enough of a financial loss to take to small claims court so that is my next move but i will never …
1 star: Bad	Booking.com allow accommodations to take the full payment out my account 4 months earlier than stated and with no prior warning despite people not being able to travel to use the accommodation due to coronavirus lockdown and quarantines. No discussion on refund, voucher or rebooking has been communicated by booking.com despite the following conditions on their website where they have asked partne…
1 star: Bad	Paid a well deserved brake for my family 2 weeks in advance, all good till 24 hours prior to my arrival when I've received an email from booking.com saying that the resort I had choose could not accept us for some reason which I don't know, they simply said that, we had asked friends to come with us, kids etc... they was all very excited like we adults were aswell, but all for nothing, called the…
3 stars: Average	Update, after numerous emails booking.com are showing my review, but only my on the pc website. The app still filters out the worst reviews I guess. So I've upgraded from 1 to 3 stars . I normally use booking.com always. However my last trip to Bournemouth is making me wonder if I'll ever use them again. The hotel I stayed at had a rating of 8.2, and no reviews under 7. Yet my stay was so bad I r…
1 star: Bad	I booked a trip to Malta back in January for a family holiday. I booked flights through EasyJet and our hotel through booking.com. We were due to fly out on 7th August and have had EasyJet cancel our flights due to coronavirus restrictions. EasyJet have offered to refund our money and we contacted booking.com for the same. We were told booking.com no longer has our money as it has been passed to …
1 star: Bad	I booked a luxury summerhouse for two nights in Iceland. It was a special and booking.com and the owners confirned me that booking. One day later, the wrote me that it was doublebooking and if I want my money back I have to do a cancelation. I think the reason was they get a better price for that because the offered it as a special and also for normal price. The name of that summerhouse was "Gold…
1 star: Bad	I am terminally ill and find myself having to write this as oppose to resting as I battle multiple infections. I used booking.com to book a two night stay with my two daughters to try and make a happy memory in all the misery. I booked at a certain resort because booking.com had a reasonable price of $144 for the first night and $167 for the second night. The reservation was made 20 hours before …
4 stars: Great	I always have my booking here and I don't have any bad experience at all. There's just one time they were not able to reply right away but I didn't mind because I know there are also a lot of queries out there too.; I always have my booking here and I don't have any bad experience at all. There's just one time they were not able to reply right away but I didn't mind because I know there are also …
1 star: Bad	This company are the biggest scammers out there. They take your money without a problem, but once you face a problem with the property (and trust me you will, because none of the properties are regulated and anyone can post a room on there without any further checks carried out by the company), Booking.com and the host will throw the blame around to one another, completing avoiding resolving your…
1 star: Bad	Horrible horrible company. Im having trouble regarding cancellation and refund for a booked Trip. BOOKING.COM just play dumb and offer no help whatsoever. This was booked through BOOKING.COM, so at least minimum service of help should be required. They got there money, now offer no assistance. Will never ever book anything through these horrible people/company again; Horrible horrible company. Im…
1 star: Bad	This is the most unprofessional and uncaring company I have ever come across. They allow “properties” and “hosts” to scam people and when you ask for a refund despite not even staying in the property, Booking.com do not allow refunds and the put the blame on the “hosts” saying that the “host hasn’t approved the refund and there is nothing Booking.com can do on the matter”. Well, what you could do…
1 star: Bad	If you go onto a hotel booking website and select a hotel with a buffet breakfast so that you can enjoy a full English where the additional price is shown, you should expect to find a hotel with a restaurant that is open. We were offered croissant in a bag.; If you go onto a hotel booking website and select a hotel with a buffet breakfast so that you can enjoy a full English where the additional …
1 star: Bad	I will never do a 3rd Party Hotel booking for any ACCOR Group Hotel via booking.com. Be warned! The issue is not with the ACCOR group,(their policy on 3rd part bookings is very clear and states you have to resolve via booking.com). Neither is it with the booking.com 1st level Customer Services agents (they only work to a script which is designed to frustrate and tell you to contact the hotel dire…
1 star: Bad	I've been a customer of booking.com for what must be around 10 years but over the last 12 months I think they really have gone downhill, Most recently, and against my better judgement, I booked some accommodation in the UK for a weekend break. Booking made, confirmation received, everything looked OK. I wanted to check that the hot tub at the hotel would be in operation so I phoned the hotel dire…
1 star: Bad	4 days before we were due to travel 100 miles to the cottage (sea view hornsea) we decided to contact the owner to arrange key pick up. guess what they no longer let out the cottage and booking.com were aware of this since march. booking.com took our balace about 6 weeks ago and didn't tell us about this. I cannot get in tuch with booking.com and they have my £850, even if i could find another ho…
1 star: Bad	SCAM -FRAUD in Vienna, Am Tabor St. using Booking.com which LOOK TO THE OTHER SIDE My family and I just came back from a trip to Vienna. We reserved the place through Booking.com. IT WAS A COMPLETE SWINDLE. The flat located in Am Tabor street is a dated and uninhabitable hole. This has been mentioned in Booking.com's REVIEWS almost two years old. We wrongly TRUSTED Booking.com's score of 5,4 (Acc…
1 star: Bad	Our holiday is in 4 days. I received a email from booking.com saying your holidays is only a few days away please contact the caretaker to arrange key etc. So I did only to be told the cottage went into liquidation in march and that booking.com have failed to let any of the guests know. My children are very upset as there is nothing anywhere suitable at this short notice. I have been on the phone…
1 star: Bad	Absolutely not worth it . The time when booking.com used to be good is long gone . My advice from my recent experience with booking.com is that you shouldn’t book with them . You’ll find out for yourself; Absolutely not worth it . The time when booking.com used to be good is long gone . My advice from my recent experience with booking.com is that you shouldn’t book with them . You’ll find out for…
1 star: Bad	Unbelievable!! In the midst of a pandemic, when my flights to Nice were cancelled and both UK and France were in lockdown, not only did my accommodation company and Booking.com refuse to refund me the cost of my accommodation, but when the only option was to change the dates to summer 2021 or lose almost £300, Booking.com then had the nerve to charge me an £8.00 admin fee for doing so!!! Absolute…
1 star: Bad	A lot of policies preventing customers from cancelling but no such restrictions for accommodation providers. Wouldn’t help when my accommodation was cancelled by the provider and they refused to refund me. I’m having to log a claim with my credit card provider to recover the money.; A lot of policies preventing customers from cancelling but no such restrictions for accommodation providers.; Would…
3 stars: Average	Booked facility in Teignmouth for weekend. Vendor premises locked and unresponsive to doorbell rings, knocks etc. Phone number as disconnected dail tone and vendor unresponsive to emails. Very difficult to contact booking.com in weekend. Resolved by friends putting us up. Wrote unhappy review and contacted booking.com requesting refund. Unable to post review as booking.com advised us we had to ca…
1 star: Bad	The worst customer service ever! If there is any problem they do nothing. They shouldn’t be in business. Such a bad attitude ????‍♀️; The worst customer service ever! If there is any problem they do nothing. They shouldn’t be in business. Such a bad attitude ????‍♀️
1 star: Bad	When something goes wrong customer service will do nothing. Long time customer, had two issues over more than ten years. Both times Booking said they can’t do anything even though the places were nothing like advertised including a drunk homeless man living in the living room of one place which had no locks.; When something goes wrong customer service will do nothing. Long time customer, had two …
1 star: Bad	Booked accommodation through booking.com. Hotel unable to provide service due to lockdown/covid 19 but no refund due to cancellation policy which covered if I had to cancel. I expect that if a hotel is not able to provide a service then a refund woukd be given. I have posted this feedback on booking.com but this was not accepted as it d it didn't fit their criteria; Booked accommodation through b…
1 star: Bad	I did a booking on the 9th of July for today at Plymouth. Traveling from Nottingham with 1 baby and 2 dogs. Today at 11:00am, I received a text message from the property cancelling my booking. Not a single communication from booking.com yet. I’m coming back to Nottingham awaiting for your answer. Do you want a review?; I did a booking on the 9th of July for today at Plymouth. Traveling from Notti…
1 star: Bad	Beware!! Suspect Villa listings on the Booking.com site. Once a booking is placed for these villa listings the booker receives a message from the 'private host' from WITHIN the booking.com app asking the customer to secure the booking by paying by bank transfer. I'm aware of at least 5 properties in Mallorca listed at present which are all, in my opinion, fake listings (no reviews, account listed…
1 star: Bad	worst customer service, the customer service person, shouts at me, to say i am idiot to sell my rooms with booking.com and says if you sell the room with booking.com you have to take the risk of guest not showing up, and i have to keep the booking alive, and not to sell the room, until the day is over, stupid people work here at customer service, looks like someone from europe answerd the call,; …
1 star: Bad	Extremely disappointing experience. An accommodation was booked but after the booking and payment went trough their client providing the accommodation changed and put new requirements contradicting the UK local. Booking.com was called more than six times and they changed their position every time. At the top of that their representative firmly declined providing with the further escalation proced…
1 star: Bad	Very poor have you running around when you want your money back, absolute disgrace, They shouldn't be in business if the customer support is so bad Staying away would be the best decision; Very poor have you running around when you want your money back, absolute disgrace,; They shouldn't be in business if the customer support is so bad; Staying away would be the best decision
1 star: Bad	The worst company I ever worked with before. As a host, I'm giving them 25% of my income, and I'm not protected at all. All the issues I have I must resolve with the guests (if I find them after). Booking is not involved in it. Booking.com is offering an option that if the guest cancels within 7-14 days before they come in I can charge them a full price, but they are not taking guests Credit Card…
1 star: Bad	Don't trust what they advertised. Free cancelation? A big lie. I wish I did a research before choosing them.; Don't trust what they advertised. Free cancelation? A big lie. I wish I did a research before choosing them.
1 star: Bad	Booked a triple hotel room, upon arrival was given a double room by the hotel as they have no triple rooms left (Even though we booked it, so don't know where our room went). I was travelling with a female friend whilst I am male so we needed separate beds. Upon discussing with the hotel, we got told we have been upgraded to a sea view, which was 90% wall 10% sea, not an upgrade in the slightest …
1 star: Bad	Disgraceful service, staff showing no empathy, impossible to get answers, promised help and never got it with regards to a booking that I've been trying to change since April. Although I understand Covid-19 has caused huge disruption, booking.com have shown their true colours of what a terrible, horrible company they truly are. Will never, ever use again.; Disgraceful service, staff showing no em…
1 star: Bad	They refuse to give me my refund from a hotel I booked and cancelled before hand. BOOKING.COM is a scam with their none existing customer service, they just list hotels online for their gains and aren't willing to contact these hotels if anything goes wrong on customers behalf.Its been 3 months no refund! Never using bookings.com again.; They refuse to give me my refund from a hotel I booked and …
1 star: Bad	Had a bad experience with one hotel, and booking.com never published my review despite me politely contacting support, several times. More than that, they deleted the whole discussion thread so I don't have any proof of their wrongdoing.; Had a bad experience with one hotel, and booking.com never published my review despite me politely contacting support, several times. More than that, they delet…
1 star: Bad	Terrible I’ve tried calling a number of times each saying my confirmation no pin no are incorrect the hotel I booked through them said I haven’t paid them I’ve sent a bank statement that shows clearly they have been paid. I will never use them again AVOID BOOKING.COM; Terrible I’ve tried calling a number of times each saying my confirmation no pin no are incorrect the hotel I booked through them …
5 stars: Excellent	Cancellation of a three week trip with various accommodation was SO easy. I was able to cancel them all before the cancellation deadline and within two clicks for each place. Out of courtesy I also emailed each accommodation to apologise for the cancellation due to my flights being cancelled. The money was refunded within 5 days. Thank you for making this all so easy.; Cancellation of a three wee…
1 star: Bad	Booked hotel in Galway on 9th January. Spoke directly to hotel on 24th March and they confirmed they were closed because of virus and full refund would be given. Despite endless e-mails and promises from Booking.com, this has still not been processed. Last one from them said it would be refunded on 1st July but again no refund! Rubbish customer service - will never use them again.; Booked hotel i…
1 star: Bad	Falsely advertised a breakfast would be included in the price of a booking. Clearly only concerned about making money and not customer service.; Falsely advertised a breakfast would be included in the price of a booking. Clearly only concerned about making money and not customer service.
1 star: Bad	FREE CANCELATION IS A LIE!! This is an extremely dishonest company!!!! I booked a trip to Africa for my family in December 2019. The property I booked was through Booking.com. At the time of booking the site said 'No cancellation fee'. However after I booked, the booking confirmation stated that I would be charged a cancellation fee in African Rand. This shocked me so I contacted Booking.com via …
5 stars: Excellent	Never had an issue with Booking for the years I've spent travelling and booking with them. Don't really understand the many negative reviews!; Never had an issue with Booking for the years I've spent travelling and booking with them. Don't really understand the many negative reviews!
1 star: Bad	Utterly atrocious! I booked for a room that didn't have all it's services available. (the hotel called me after 10 minutes when I booked through the site, to advise this. So trying to contact booking.com, and ask for a partial refund...well I have zero response. THEN, Also to see that they were still advertising the same service, to which I emailed again on. Still...zero response. DO NOT USE. THE…
2 stars: Poor	Not very happy at all with booking . Com we booked a 2 night stay in Blackpool in a hotel (my husband has worked all the way through the COVID 19 pandemic and this was our first break ) so we had booked into our Favorite hotel And was really looking forward to it .Then 3 days before we were due to go we had an email off booking . Com telling us the hotel was closed and they suggested alternative …
1 star: Bad	They suddenly charged 75€ extra for hotel my girlfriend and I booked. I contacted them asking why, they replied vaguely, I wrote back asking for information.. they just ignored me. Not the first time having issues with Booking.com, so shame on me.; They suddenly charged 75€ extra for hotel my girlfriend and I booked. I contacted them asking why, they replied vaguely, I wrote back asking for infor…
1 star: Bad	Booked a villa in Cyprus but due to COVID 19 I couldn’t enter the country due to government restrictions.I called booking.com as on their website they said they’d give refunds but they continually said their systems say U.K. citizens can enter Cyprus even though we can’t as per gov.uk and the Cypriot website.the staff we beyond useless and I lost over a grand.will never ever use them again and wo…
1 star: Bad	Customer service is disgraceful, booked hotel for hen do (£700) Hotel said we could have FULL REFUND however whilst trying to get through to booking.Com no one answered eventually after trying for a month! Finally answer the phone then say the payment has been made and will get in contact in regards to a refund, would email with a update. 3 times I've called since being told this and still NO pro…
1 star: Bad	Booked a place online , i clicked pay at hotel and booking wanted to go ahead and charge me. I called the hotel and they didn't even have a reservation for me!; Booked a place online , i clicked pay at hotel and booking wanted to go ahead and charge me. I called the hotel and they didn't even have a reservation for me!
1 star: Bad	Booking.com allowing hotels to advertise their accommodation for seasons 2020 despite some of those hotels being closed with no intend to re-open this year at all even though they are allowed as lockdown is lifted. I fell victim of one of those fake adverts. Hotel rudely said that they wanted to check how many bookings they can get and told us they will accommodated next year without any regards …
1 star: Bad	I have used them a few times and found them to be generally ok. Last time however I booked for a Christmas period a luxury safari tent which turned out to be horrific and not as decribed. The camp was situated at the end of very rough dirt road, more suited to a 4x4 vehicle rather than a small family saloon, approximately 2 kilometers from the main road. Would have been totally impassable in a sm…
1 star: Bad	Same problem as so many others! Booking.com took payment in June last year for a hotel booking in June this year which was cancelled as the hotel was closed! No response, no refund! DO NOT USE BOOKING.COM; Same problem as so many others! Booking.com took payment in June last year for a hotel booking in June this year which was cancelled as the hotel was closed! No response, no refund!; DO NOT USE…
1 star: Bad	Booked Clarion Inn in Atlantic City for birthday weekend getaway, COVID hit, all events got canceled and they let me cancel the room and said they would refund me... that was in March... it is now July and still No refund!!!! Will never use booking.com again and sure won’t ever stay at the Clarion Inn in Atlantic City ever! You aren’t the only ones hit hard by COVID. You were paid for a service t…
1 star: Bad	Couldn’t visit hotel due to COVID an lack of trains. No refund. On a previous occasion we stayed in an apartment in Croatia which was appalling and had extremely dodgy wiring. They published our review but I couldn’t find it. It was on page 9!; Couldn’t visit hotel due to COVID an lack of trains. No refund. On a previous occasion we stayed in an apartment in Croatia which was appalling and had ex…
2 stars: Poor	We were unable to travel overseas for a hotel stay due to covid - fortunately booking.com offered free cancellation in March. No refund from hotel - they did not reply to my attempts to contact them so I asked booking.com if they could help. Told twice they could but 6 weeks on no reply and I cannot reach customer services by phone. I have sent another email but have little hope of this being res…
1 star: Bad	Allowed someone to use my details to make a false booking stealing my card details. They were not interested in investigating it despite having the fraudster name and details of his booking. They told me that my debut card couldn’t be used without the card being present which is nonsense as the card was processed remotely. The card was present with me 200 miles away. I have not left the house in …
1 star: Bad	I booked a room in 2019 and had to cancel because my daughter broke her leg. I cancelled with the hotel and asked for a refund. I was told by Booking that they had contacted the hotel and were asking for the refund to be authorised. 12 months later and after lots of chasing and frustration, I am being told that I will not get a refund. Booking's customer service have been totally unhelpful and th…
1 star: Bad	The booking system is very easy and straight forward. The challenges come should you have problems with the booking and more frustrating when not your fault. Communicating with customer service is a nightmare. They really don't want to know and put every obstacle possible in the way of achieving a resolution. They want to take your money then hang you out to dry. It is only when faced with proble…
1 star: Bad	They don't care who advertises on their sites, its just one big thieving rip off. You cant ask the properties questions until you book and although they say money not taken straight away- they do - then you cancel for free as they don't have what you want and then don't get your money back- DONT USE THEM- I HAVE BEEN ROBBED BLIND; They don't care who advertises on their sites, its just one big th…
1 star: Bad	Do not use this company. As soon as there is a problem they say the problem should be solved with the hotel. Airbnb are much better. Booking.com are a bunch of thieves. Very bad service. If it was possible to give no star I would. I will never use this site again. They ca not be trusted.; Do not use this company. As soon as there is a problem they say the problem should be solved with the hotel. …
5 stars: Excellent	always works instantly for booking hotels around the world. The prices are lower than can find anywhere else - including direct from the property (usually) Just be careful about prepaid reservations and the terms or you can get caught out but in general Booking.com is a great service with the genius discount even better!; always works instantly for booking hotels around the world. The prices are …
1 star: Bad	Useless company, made a booking through them where the property took an upfront payment. Due to Covid the property cancelled my stay (westcliff hotel Southend). 4 months later and the hotel is now open but still has my money, booking .com have done nothing to help I'm now going to have to pay a solicitor to get back my money. Do not trust this company they are leeches.; Useless company, made a bo…
1 star: Bad	Don’t deal with this lot I had my holiday cancelled due to Covid 19 they told me no refund from hotel so I contacted the hotel they where more than happy for us too amend our booking for net year and we did this I then contacted Ryanair a easyJet about flight refunds Ryanair money was returned easyJet gave the money back too original credit card witch was booking.com over £560 tried getting it ba…
1 star: Bad	Booking.com is a real scam. They treat their customers terribly and will charge your account money that is not owed to them. If you have an emergency and need to modify or cancel they will still charge your account even if you try to cancel days prior. Stay away and use hotel.com I will never use them again!!; Booking.com is a real scam. They treat their customers terribly and will charge your ac…
1 star: Bad	The worst people with the worst customer service ever. Made us drive more than 5 hours with my wife and 2 years old allergic kid but no one available at that house. Wasted again more than two hours talking with them and was offered cheapest and the worst possible alternative & was told that there was nothing else they could do. Then I had to come back home and drove again 5 and half hours. The wo…
1 star: Bad	Oh dear, where to start with this one... So basically I was due to go on holiday in June for a week backpacking across islands, so I had 4 separate hotels booked with booking.com. The issue is their customer services. It's non-existent. They took AGES to respond to me and give me an actual answer as to when I was going to get my refunds, one person would say 7 days, one would say 14 days and anot…
1 star: Bad	booking.com are trying to keep hold of whatever money they have left. They are not giving out refunds anytime soon. Lost 800 quid. Don't recommend. If you want you money back start as soon as possible or you might get your money for years; booking.com are trying to keep hold of whatever money they have left. They are not giving out refunds anytime soon. Lost 800 quid.; Don't recommend. If you wan…
4 stars: Great	Great service if you travel a lot. Their suggestions are sometimes a bit off. I don't want to visit the same place 2 weeks after I just came from there :) But in general a lot of good deals on hotels.; Great service if you travel a lot.; Their suggestions are sometimes a bit off. I don't want to visit the same place 2 weeks after I just came from there :) But in general a lot of good deals on hot…
3 stars: Average	I like using Booking to research the area, has great navigation and amount of choices. BUT! quite often prices on the hotel websites are better than advertised on the Booking site.. so better check twice!; I like using Booking to research the area, has great navigation and amount of choices. BUT! quite often prices on the hotel websites are better than advertised on the Booking site.. so better c…
1 star: Bad	There was an issue paying with my card at the hotel. The system at the hotel was down at the checkout and I needed an invoice. Since I had to take the train, we agreed the hotel receptionist would charge me later. Later he tried but he could not make it, and called me complaining and asking for my card details over the phone (very impolitely by the way). I asked booking.com for help on the chat, …
1 star: Bad	It looks, Booking.com has no idea what they are selling. I paid for 3 nights in "Micasita Alicante B&B" Address: Calle del Capitan Segarra 41-43. I was informed it is open until 23:00. I did arrived about 21:45. There were no B&B sign on the house. Door was locked. In the house no less than 20 flats. So I started push the bells. No one has any idea about B&B. Then one man told there is a woman wh…
1 star: Bad	Never will use this app again. They took my money from account for the booking where is not existing. And i been told my refund will take 15-30 days!.if you made mistakes make sure you give money back to people in at least 3 working days. Defently not recommending; Never will use this app again. They took my money from account for the booking where is not existing. And i been told my refund will …
1 star: Bad	I made a booking with these only to turn up to our hotel and be turned away saying that the booking had been cancelled we drove a long way to get there aswel we had no notifications that this was cancelled nothing .. only to be treated badly by the receptionist.. we contacted booking . Com and told them the issue .. only for them to make up even more lies first of all our card was declined then t…
1 star: Bad	The app was easy enough to use. I cancelled prior to the deadline due to a surge in Covid 19 cases in the area . The app clearly showed the cancellation so I was not worried of being charged anything with the free cancellation terms. Unfortunately the hotel did not receive the cancellation from booking.com and so they charged it as a no show. The hotel had no reason to help. Terrible service From…
1 star: Bad	My family used booking.com to book a vacation with blue diamond hotel in wildwood . Blue diamond hotel is unfit, leaking ceiling, dirty broken furniture. A hotel that is not following the cdc guidelines to stop the spread of covid. Booking. Com represent hotel like blue diamond hotel does and injustice to consumers. Booking. Com did nothing to help my family with the unjust treatment from blue di…
1 star: Bad	Shocking Customer Service , Rude or automated Emails,ignoring all questions asked. I was promised a refund by a certain deadline 3 times. How is that a deadline, if they keep putting it back ?? Still looking doubtful i will get my money .Will never be using this company again .Be warned you don't know haw awful they are till you need them . Disgusted , will look at going to the small Claims Court…
4 stars: Great	I have given them four stars because I really like the free cancellation options. More websites should offer this as it becomes very difficult to book rooms during busy periods when you wait and see if you can get it off work etc. Most of my experiences with rooms from booking.com have gone very smoothly. No issues, which is why I gave four stars. BUT I did have one very horrific experience. Me, …
1 star: Bad	I booked a hotel 3 days before the stay date with included breakfast. The hotel did not serve breakfast supposedly because of Covid restrictions. These covid restrictions were in place for weeks/months, they were not implemented over night, yet the hotel decided to advertise that they serve breakfast! This is not fair! For the additional cost I could have had a better hotel that serves breakfast.…
1 star: Bad	I totally agree with all the bad reviews about this awful hotel booking website. We booked 2 hotel stays in Venice to coincide with a cruise we had booked with Royal Caribbean. As a result of the Covid 19 outbreak we decided to postpone until next year. I telephone booking.com to change the hotel dates to next year. They were totally unhelpful. I contacted the hotel direct by email. What a differ…
1 star: Bad	The story of two travel agents, a hotel, and the 'PIGGY IN THE MIDDLE' customer. We have used Booking.com many times successfully. However we booked and paid for a holiday on the Booking.com website in October 2019 - and when the confirmation came through the holiday package did not include the meal plan that was shown on the booking web site. When I checked the confirmation it was actually booke…
1 star: Bad	The worst hotel booking website out there. Be very careful when paying, you will be shown a price, but in the end, you will pay something much higher. They hide very carefully the extra-charges and fees. Do not trust their product, they use dishonest practices. One example, try to contact the live chat about a "cancellation" or a "refund". You will not get a chat agent (unless you wait for a few …
1 star: Bad	They are a scam! They will not refund the money. Due to COVID 19 our hotel was shut and they kept on saying we need to get a hold of the owner of the property.But they hang up and say we will call you back in 30 minutes and they never do!; They are a scam! They will not refund the money. Due to COVID 19 our hotel was shut and they kept on saying we need to get a hold of the owner of the property.…
1 star: Bad	Me and my girlfriend just lost €998 to booking.com. After the corona virus our hotel was closed and we rang up booking.com for a refund about 20times they claimed that the hotel will be open in August after the hotel specifically published and emailed me saying that we closed till September the 3rd. I gave booking.com the evidence of that the hotel will be closed, they said the evidence is invali…
5 stars: Excellent	Just returned from 3 days in the Bloomfield Brew House in Blackpool and I must say the whole stay was excellent. The couple who run the place Shane & Gary (with trucker, the gorgeous doggie) couldn't do enough for us, Shane was everywhere never stopped and his partner Gary was the most fantastic chef, the food was out of this world, allways fresh and plenty of it. The bedroom we were in no 1 had …
1 star: Bad	Lost £471 pounds on a hotel booking which I never used due to co-vid. Never use again.; Lost £471 pounds on a hotel booking which I never used due to co-vid. Never use again.
1 star: Bad	I have lost MONEY on 2 bookings I made through them during the pandemic I will never use them again.; I have lost MONEY on 2 bookings I made through them during the pandemic I will never use them again.
1 star: Bad	They never stand behind the customer. Their role is limited to selling the offer and that's it.; They never stand behind the customer. Their role is limited to selling the offer and that's it.
1 star: Bad	My partner booked an apartment in Portugal through booking.com, due to the coronavirus outbreak his flight got cancelled and the festival he was planning to attend was cancelled too. The travel advice from the UK government remains against all travel to Portugal, meaning that even if there was any way he could get there - his travel insurance would be void, let alone the risks to health etc. Book…
1 star: Bad	Awful company, terrible customer service with awful attitudes. Will go out of my way to ensure I never give them money again.; Awful company, terrible customer service with awful attitudes. Will go out of my way to ensure I never give them money again.
1 star: Bad	I d rather stay home and not vacation , rather than use Booking.com (BC). NO CUSTOMER SUPPORT, SCAM of a company. PLEASE, book with ANOTHER company other than BC, especially if you want a favorable travel / vacation experience. Hopefully they go out of business soon They ask for a reference number to review our concerns.....BC is full of BS.; I d rather stay home and not vacation , rather than us…
1 star: Bad	Booked into the Royal Bath hotel and spa in film Bournemouth Friday & Saturday 10 & 11th July 2020. We chose to upgrade our room as the budget booking didn’t have any windows in the room. We had a beautiful Seaview on the third floor and the large double room but unfortunately when we pulled back the sheets to check the cleansing us at the hotel the mattress was covered soiled bodily fluids. I re…
1 star: Bad	Scammed me with a lot of money during my holiday. Promised refund but never payed me back; Scammed me with a lot of money during my holiday. Promised refund but never payed me back
1 star: Bad	No help. They avoid to try help customers. You book via booking.com and after you paid they wash them hands. They have policy on the website and when you try go with that they saying that you are not allowed to use that policy and still no refund . The worst company ever.; No help. They avoid to try help customers. You book via booking.com and after you paid they wash them hands. They have policy…
5 stars: Excellent	The site is user friendly. Quick and easy offers a good description of the location, allows writing peculiar notes. The location answers in a short while so that you make sure everything required has been forwarded.; The site is user friendly. Quick and easy offers a good description of the location, allows writing peculiar notes. The location answers in a short while so that you make sure everyt…
1 star: Bad	You have deactivated my account for no reason and without any notifications and without offering any support. You have just ruined the trip I was planning, as I intended to book everything with you. I've been your customer for almost 10 years and I had a reservation with you in less than 15 days. Now I do not even know if it is still confirmed. Good to know how you treat you beloved clients. ESPA…
1 star: Bad	We booked a B&B through this bunch of shysters a couple of months ago hoping the lockdown would be over by the end of August, this week we received an email from them telling us the room was no longer available, within 24hrs we received another email suggesting we book a room at the very same B&B, we checked the available dates, surprise surprise the room we booked is available but at £49 more, d…
1 star: Bad	I have used Booking.com for a number of years to the level of Genius 2. However, I will not use them again. As with many other reviewers on this site I have been trying to obtain my contractual refund (a significant sum) for the cancellation of my accommodation due to the pandemic. Booking.com's customer service dept are obviously trained to continually play for time and blame the accommodation p…
1 star: Bad	Would give no star if possible. Untrustworthy lies, claim to not understand!! My holiday was cancelled because of Covid19 and a credit voucher issues. Now government rules have changed and refunds must be given booking.com refuse to do this. Despite issuing a credit voucher to me for next year! they say the money was not paid to them. Same email sent repeatedly with no assistance. Rubbish custome…
1 star: Bad	I have never used them before. I used them this time and I booked 4 night with the Western Traveler Motel in Grand Forks, BC. The owner did not respect the fact that I had a wife and after the first night he made an excuse that had no backup to ask me to leave. When I questioned him he became hostile and walked away.; I have never used them before. I used them this time and I booked 4 night with …
1 star: Bad	The poorest customer service experience. A simple request to cancel a booking as unable to travel due to covid. During multiple calls every customer service agent gave a different response to what I need to do. Hours wasted on what should have been a straightforward cancellation. Well done BC, you've lost someone who had been a loyal customer; The poorest customer service experience. A simple req…
1 star: Bad	I have been trying for months now to get a refund for a villa we booked through Booking.com back in April but unfortunately due to COVid 19 we were unable to travel. Everytime I have spoken with booking.com they have said that they will contact the owner of the property but to be assured I will receive my money back. I tried to contact them this evening via phone but would you believe it they no …
1 star: Bad	I have a few issues with Booking.com. 1st is they if you have a complaint will not pass it on to a supervisor or manager - so when there is a major issue with a booking it is basically "take my reply or leave it". They then just don't reply!!!!!!!!! 2nd is on their site and I guess the same for other ones in the massive worldwide operation what price you are quoted is not always the full price as…
1 star: Bad	Booked a hotel for the upcoming England - Pakistan test match due to take place in August. The event will now take place behind closed doors so I contacted the hotel via Booking.com to change the dates to a few weeks later - no problem. Now they want £672 for 2 nights (£238 more than I've already paid), even though I can do a complete new booking for less than my original price. Never again will …
1 star: Bad	My advice is not save your credit card data with this company. They can charge funds from it w/o any consent from you. I asked them explanation, but still no answer ...; My advice is not save your credit card data with this company. They can charge funds from it w/o any consent from you. I asked them explanation, but still no answer ...
1 star: Bad	Sadly never got to stay with the hotel due to the C-19 lockdown and restrictions. We needed to cancel our booking for genuine reasons but neither the hotel or booking.com would consider any form of refund. While it is appreciated it is difficult times, there was no flexibility to find alternatives. Buyer beware - esp if you need to cancel at a later date.; Sadly never got to stay with the hotel d…
1 star: Bad	Booking.com will take your money in a nano second! But try getting a refund....they will ignore your e mails and keep you on hold if you try and ring them making any communication impossible! We booked a holiday in march 2020 and due to family illness and covid we cancelled. We just need proof of cancellation for travel insurance purpose. We are now in July and still they haven't responded. Will …
1 star: Bad	I cancelled a FREE CANCELLATION booking only a few minutes after making and paying in full for it. Almost one month later they haven’t issued any refund and ignored all my messages until I opened a case with PayPal and still they’re trying to take no responsibilities. These scammers have lost my whole family business.; I cancelled a FREE CANCELLATION booking only a few minutes after making and pa…
1 star: Bad	I had again and again problems with this hotel booking website! Especially, when it comes to payments, they are extremely efficient to take your payment even when the property listed clearly states FREE cancellation. In other words, they charge your credit card even if they should not and getting the money back might mean many extenuating phone calls and exchange of e-mails. Use Hotel.com instead…
1 star: Bad	Messed up a booking for us, and put the blaim on the hotel. Slow response when we asked for help to correct the mistake. Next time; avoid booking.com and deal directly with the Hotel!; Messed up a booking for us, and put the blaim on the hotel. Slow response when we asked for help to correct the mistake. Next time; avoid booking.com and deal directly with the Hotel!
1 star: Bad	Booked a room through booking for my employees and not only they haven’t received the booked room but also they were lied to by a customer service that the full refund will be granted. Absolutely disgusting. They are selling rooms that are already booked and they have no interest at all into helping you! AVOID !!!!; Booked a room through booking for my employees and not only they haven’t received…
3 stars: Average	I almost gave up until I got help from Mrs Elizabeth and she recovered back my lost funds; I almost gave up until I got help from Mrs Elizabeth and she recovered back my lost funds
5 stars: Excellent	The accomodation I booked had a no refund cancellation policy. The accomodation were very unhelpful during Corona virus outbreak and we're refusing to refund, only offering a voucher to be used within the year. Booking.com contacted the property and demanded a refund which I received within 30 days, they kept me informed and we're always calling or emailing to reassure me. Would definitely use bo…
1 star: Bad	Terrible service. I've paid 50% of my booking, I wanted to pay another 50% 1 day before due and I received message that they just cancelled my booking, wanting to take all my money! I'm trying to resolve this with them 3rd day, asking for refund, I'm spending 1h everyday on the phone, they bouncing me to wait another day. Be better!; Terrible service. I've paid 50% of my booking, I wanted to pay …
1 star: Bad	Booking.com is good service only if everything runs well, once issues occur it is THE WORST SERVICE EVER. I had a reservation for beginning of June 2020. Because of closed borders (Covid-19) I knew ahead that I won't be able to come to Cracow in that time. I started to try to contact the property at the beginning of may. At first I tried to contact the property to change the date/get voucher. Pro…
5 stars: Excellent	I have been booking via booking.com for years and never had any issue. Even recently with the pandemic, refund was not a problem. I also get the genius discount on some hotels which is great.; I have been booking via booking.com for years and never had any issue. Even recently with the pandemic, refund was not a problem. I also get the genius discount on some hotels which is great.
5 stars: Excellent	I cannot fault booking.com Received an e mail from them on Saturday 4th July advising that our hotel we had booked for Seville for August 5th was closed due to virus & they would refund.Refund received today - just 5 days later. Well done booking.com much quicker than rival Companies who are taking up to 3 months to refund Thank you; I cannot fault booking.com; Received an e mail from them on Sat…
1 star: Bad	We made a reservation at a hotel in San Sebastian Spain for June 2020. We informed Booking.com to cancel the reservation in February because our flights were being cancelled due to Covid 19. We were told by Booking.com that they would give us a voucher for next year for the same hotel. We explained to them that because we were older, over 70, we wanted a refund of our payment for our stay as we d…
1 star: Bad	Thieves When I found my reservation on booking.com, the room was saying $89 per night. I was going to be charged $214 for two nights and didn't question it. The room I booked CLEARLY said BREAKFAST included and POOL included. The ONLY reason why I went to the hotel was to unwind and be treated nice. There was NO ACCESS to the pool. The breakfast we were Handed out like dogs was a bagel, peanut, o…
1 star: Bad	They take over 2 weeks to issue you a refund even if you cancel before the deadline. That is super sketchy and obviously absurd. What are you using my money for booking? There is absolutely no logical reason for this aside from the obvious fact you are using funds for other purposes. Lost my business.; They take over 2 weeks to issue you a refund even if you cancel before the deadline. That is su…
1 star: Bad	dont give up. after many many emails and phones calls with the cottage and booking.com refusing a refund due to covid, they gave in and refunded me in full. they should have done this from day one. they have lost many costermers due to the dredfull way we have all been treated; dont give up. after many many emails and phones calls with the cottage and booking.com refusing a refund due to covid, t…
1 star: Bad	Lies, lies and more lies guaranteed if you book with this company. Promised refund months ago but still fighting for it. They mus be going bust as they simply don't care.; Lies, lies and more lies guaranteed if you book with this company. Promised refund months ago but still fighting for it.; They mus be going bust as they simply don't care.
1 star: Bad	Unfortunately I was unable to choose zero stars as the option wasn’t available. If I was it would have been zero for sure!! Booked a London hotel in January for a special birthday treat for my wife but cancelled due to covid. Booking.com promised money back by end of May which then became end of June and still not received it! As with all these online booking agencies despite BOOKING and PAYING t…
1 star: Bad	Please be warned, never use this company. Zero help in getting my money back for a Cyprus trip that I couldn't get to due to COVID. I do not want to bore you with the details other than to say I have begun charge back proceedings via my credit card company. DO NOT EVER USE THEM.; Please be warned, never use this company. Zero help in getting my money back for a Cyprus trip that I couldn't get to …
1 star: Bad	Booking.com leaves their customer in the rain. My flight was chancelled and booking.com does not want or is not able to help. Only bla bla bla; Booking.com leaves their customer in the rain. My flight was chancelled and booking.com does not want or is not able to help. Only bla bla bla
1 star: Bad	Don't book with them is my advice, I booked two short breaks for me and my wife in June for the end of July and early August (taking dog on one of them) but have now had to cancel, we cancelled both within the free cancellation period and have the email confirmation but the establishments have charged us for the bookings anyway, now I have asked Booking.com for help and nothing, this has been goi…
1 star: Bad	Horrendous - zero support or customer service. No interest to help customers. They add no value; Horrendous - zero support or customer service. No interest to help customers. They add no value
1 star: Bad	I booked a room for the weekend and after it was paid they contacted me and hiked the price. First the guest house tries to double cross booking.com offer me a private deal then booking.com comes in telling me ive got 48hrs to cancel or pay the extra. sharks!; I booked a room for the weekend and after it was paid they contacted me and hiked the price. First the guest house tries to double cross b…
1 star: Bad	Customer service system to work with client's requests is very poor. I wrote my request on the website. Every new answer didn't save my beginning email. Every new customer service person asks me the same information. My question was not resolved.; Customer service system to work with client's requests is very poor. I wrote my request on the website. Every new answer didn't save my beginning email…
1 star: Bad	Fraud activity, very bad. I made reserve (on 03-07-2020) in booking to stay 1 night from 04-07-2020 in "Hostal INTER Puerta del Sol". Booking charged me full price when I was reserving. On 04-07-2020 I came to the hotel, and hotel was closed until December 2020.Inside the bulding i found notification in one sheet pasted on the door of the hostel telling in Spanish that "Hostel is closed and you s…
1 star: Bad	Booked a hotel in France for 2 nights but covid19 caused my ferry to be cancelled. Took ages to find out how to contact someone at booking.com. Eventually found it was 7 clicks to get through to a webchat service. Then found out it appears to be unmanned many times, you just wait and wait. Then found out they are not really interested in helping, they have your money. In the meantime my account w…
1 star: Bad	Whoever is trying to justify getting a refund back from booking.com probably works for them. I've had this happen to myself and just happened again to my boyfriend. He booked something quickly without telling me. If I knew it was booking.com I would have told him to not use their services. We ended up getting charged for a room we didnt stay in. Not a cancellation fee but the full price of the ro…
1 star: Bad	If it is possible to give zero stars i would. I have been trying to get a refund for a booking that i've want to cancel due to COVID-19. The original booking was non-refundable but that was before we were in a panedemic. I have 4 people in my group who are considered as vulnerable and even have government letters asking them not to even leave their homes regardless of the lockdown having been lif…
1 star: Bad	After trying to contact a property myself for months thought id see if booking.com would be any help. Sadly all i found out was that i could have cancelled if id called earlier and that they cant help any futher. Really disappointed. Does not look as if im alone. Also will be very reluctant to use Booking.com again!!!; After trying to contact a property myself for months thought id see if booking…
1 star: Bad	I am very disappointed by the service booking.com. After refusal of service by the accomodation there was no reply or support in refunding. I won't use it again.; I am very disappointed by the service booking.com. After refusal of service by the accomodation there was no reply or support in refunding. I won't use it again.
1 star: Bad	If i could leave a zero stars out of 5 i would! Appalling service despite assurances i would have a reply shortly. Its now 5 weeks since a refund was promised & over 4 months since my trip was canceled due to covid. I appreciate the trying times but surely this when the best companies excel.......AVOID!; If i could leave a zero stars out of 5 i would!; Appalling service despite assurances i would…
5 stars: Excellent	Booking. Com refunded me for a cancellation almost immediately, and I am amazed that every time I have dealt with them they provide a great service, it is a shame easyjet and virgin do not have that quality , booking .com have met every one of their obligations to me past and present.; Booking. Com refunded me for a cancellation almost immediately, and I am amazed that every time I have dealt wit…
1 star: Bad	I made a reservation on April 23, 2020 on Booking.com for a July 17-19, 2020 rental stay for my daughter's graduation. I thought I was placing that reservation directly with the property, "Indian Lady Lodge" but after pressing the confirm button on Booking.com, I was directed to a 3rd party vacation rental service called "Evolve". They noted in their fine print that if I cancel up to 30 days befo…
1 star: Bad	I have been using Booking.com for years but since I have been trying to ask them for help because I have been unable to contact the property owner to resolve issues with my booking (covid 19 related cancellation), I have only encountered problems from them. They do not take any responsibility, do not provide information, do not provide terms and conditions, make their own rules and no policies an…
1 star: Bad	I’ve had one of the worst experience with them. The information provided on the bookings apps was completely different then the actual accommodation. The rooms did not have private washroom, the room was above the DJ floor, and the beds I had booked on booking were subject to availability. None of this information was provided on the bookings app. Once, I asked for a refund they have been nothing…
1 star: Bad	Absolutley disgusted. No help or support at all. And never anyone to help out. I have messaged, e mailed and tried to ring numerous times. Since the start of covid I have tried numerous time to get in contact with booking. Com. Our hotel was paid in full upon booking in February before anyone had even heard of covid. After months of trying to contact the hotel they eventually refused to issue a r…
1 star: Bad	I've been on the phone and live chat with them for over 2 hours and nobody is answering. Someone answered one time, then I was put on hold again for another 20 min and just heard a beeping sound. HORRIBLE HORRIBLE Customer service!; I've been on the phone and live chat with them for over 2 hours and nobody is answering. Someone answered one time, then I was put on hold again for another 20 min an…
1 star: Bad	Terrible service, wouldn’t help me at all and I had to play games with them. Don’t book with them ever.; Terrible service, wouldn’t help me at all and I had to play games with them. Don’t book with them ever.
1 star: Bad	Terrible customer service. I booked a hotel in Ireland last year. I arrived in the evening looking forward to a relaxing meal as I had spent the day driving/sightseeing. Unfortunately the hotel had no record of my booking. I was fortunate that I was able to find a room few seats away. Like many people in lockdown I have had the opportunity to sort through paperwork. I therefore made a complaint t…
1 star: Bad	Booked a villa, trip did not take place as all flights were cancelled and airports closed due to the pandemic. I have had a partial refund but £300 pounds has been withheld. Booking .com have washed their hands and simply advised me to” take care”. Totally unacceptable. I have used this company for many years booked personal and group holidays, all fine until there is a problem. DO NOT USE THIS C…
1 star: Bad	Full scam,kept charging my account for hundreds with no new reservations, then when I called it just said due to Corona we have no customer service and hung up?? Unbelievable! Do NOT PUT YOUR CREDIT CARD INFORMATION INTO THAT SITE!; Full scam,kept charging my account for hundreds with no new reservations, then when I called it just said due to Corona we have no customer service and hung up?? Unbe…
1 star: Bad	Very frustrating and unethical behaviour. Giving misinformation, lies and changing the information all the time. I made a Free to cancel hotel booking from Netherlands to Basildon for 6th of July-10th July and a changeable Flights. Because of the change in travel policy of UK govt because of Covid19, I requested for a cancellation with Lastminute.com. I placed the request with them on 3rd July as…
Fadi Saade; 1 star: Bad	Booking.com "customer service" is pathetic. It's taken me 4 months to get a refund on my booking, which was advertised as nothing to pay until check in. So the advert was false from the start. Despite providing them with evidence that a deposit was demanded,paid, received, and the accomodation promised a refund, booking.com's "customer service" still demanded a letter from the bank confirming pay…
1 star: Bad	Booking.com are using this pandemic to their advantage. I have a non refundable reservation for the end of this month in Cyprus. Travel regulations make it impossible for me to enter the country, I’ve asked for a refund, voucher or moving of dates and booking.com won’t help me at all, in fact their last email signed off with ‘Our customer service team will no longer be able to assist.‘ Charming! …
David Luft; 1 star: Bad	I have used third party booking agents in the past. Booking.com to date was my worst third party booking experience. After booking a stay I attempted to cancel the reservation. First, I did not receive a confirmation from Booking.com. second, it was most difficult to attempt to cancel. Third, after my visit to the hotel, I was charged for two nights!! The hotel was gracious enough to refund one n…
1 star: Bad	This company IS A SCAM!!! This company IS A SCAM!!!! Hollywood beaches are closed for 4th of July due to COVID19 and they will not refund or even CHANGE DATES TO ANOTHER WEEKEND!!!!! We were going to rent at *******321 HAYES STREET Hollywood, FL. ******* the host wont even honor changing dates during this world wide crisis! Shame on you! I have friends staying at another location with airbnb and …
5 stars: Excellent	My experience with a refund a few days ago: 29.6.2020 I canceled already paid accommodation in estonian hotel. System announced: "We will refund your money automatically. You should receive it within 7 to 12 days." 30.6.2020 email from booking.com: "Your reservation has recently been canceled. You will be refunded the amount of € 109. The amount should be transferred to your account within 7 to 1…
1 star: Bad	We haved used this company on many occasions and was happy. BUT NOT HAPPY with them now. Due to covid-19 restrictions we are unable to leave the UK to go to Hamburg on the 4th July until 8th July £300. THEY WILL NOT give a refund. The hotel Novum Eleazor Hamburg Centre will NOT give a refund. THEY will NOT change the date for 2021 - Disgusting DO NOT USE Booking.con THEY ARE not at all customer f…
1 star: Bad	I booked a room in a IBIS hotel in Amsterdam from the 16 July 2020 to the 20 July 2020 using the non-refundable price. Because of the coronavirus issue, I can't get there. The hotel policy is that it is possible to claim a voucher to be used at a later date, even for the non refundable and non modifiable booking. I quote from the hotel website (that was also confirmed by the hotel I contacted dir…
1 star: Bad	I get booking.com one-star because I can't give him a zero. In May I had to book a trip due to my brother's funeral and I rented a car on booking.com for Philadelphia. When I got there I was rudely disrespected by the customer service agent very rude and informing that I had not paid when I showed them my booking information in that it was paid through booking.com he told me it wasn't recorded an…
1 star: Bad	The Customer Service experience was the most idiotic I have ever seen. There are some absolute idio-ts answering emails with Grade 1 education. The moment you run into the problem forget about any help; The Customer Service experience was the most idiotic I have ever seen.; There are some absolute idio-ts answering emails with Grade 1 education.; The moment you run into the problem forget about a…
1 star: Bad	My husband booked one night for a Stansted airport hotel on 01.06.2020 using Booking.com. After driving for 8 hours we arrived at the airport where we were informed that we wouldn't be able to stay because as only key workers are allowed to under government regulations. While we understand the country is in lockdown, since airports have been an exception to this with air travel having always been…
1 star: Bad	Sadly this company has left its customers in the lurch. Covid 19 issues meant I couldn’t take the holiday due to circumstances out of my control. Chasing the accommodation proved fruitless, They gave no explanation why they wouldn’t refund me, so I got Booking.com involved. Initially stated they could get me a partial refund as they had cover until the end of May, but I’d have to wait for the res…
5 stars: Excellent	Well it seems like Booking.com are getting a bit of a bad rap. They looked after me on a number of occasions and again recently with a hotel. Difficult times - don’t be too quick to judge.; Well it seems like Booking.com are getting a bit of a bad rap. They looked after me on a number of occasions and again recently with a hotel. Difficult times - don’t be too quick to judge.
5 stars: Excellent	I had difficulty with one of my guests on booking.com, and booking.com customer service helped me and went extra mile for comforting me and making my difficult situations with this specific guests much easier. Thank you booking.com!!; I had difficulty with one of my guests on booking.com, and booking.com customer service helped me and went extra mile for comforting me and making my difficult situ…
4 stars: Great	I have used Bookings.com since 2017. I've booked a total of 11 hotels through them. Completed 9 holidays with no problems. I had 2 bookings that needed cancelling due to Covid19. 1 hotel was Onsenminshuku Kosakaya in Katsuura, it was a payment on arrival deal and I was still within the free cancellation period so it was easy to cancel this one. However, the 2nd hotel was non-refundable on Booking…
1 star: Bad	Flights cancelled, government prohibited entry - NO REFUND! Have used booking.com for years both personally and through my company. Booked a hotel in Montenegro, our flights were cancelled a couple of weeks ago. Booking.com refuse to refund the hotel costs despite the Montenegrin government banning UK visitors during our stay dates. Both the hotel and booking.com have been very unhelpful offering…
1 star: Bad	KEEP WELL AWAY FROM THIS ORGANISATION - YOU HAVE BEEN WARNED. My flight has been cancelled due to Covid, I have the money back from the Airline, however Booking.com are refusing to reimburse me for the holiday cost. I would never use them again!; KEEP WELL AWAY FROM THIS ORGANISATION - YOU HAVE BEEN WARNED.; My flight has been cancelled due to Covid, I have the money back from the Airline, howeve…
1 star: Bad	Have used booking.com for many years - their handling of bookings during Covid-19 has been nothing short of shameful - even when government advice tells not to travel, they will not assist on cancelling bookings - their staff are rude - Pietro G and Yvonna - totally inflexible. I have already moved all my bookings that I could to direct with hotel or hotels.com - avoid these thieves at all costs;…
1 star: Bad	I used Booking.com for years and stayed in over a 100 hotels using their site. Due to the COVID-19, they cancelled the hotel, and when I requested a refund. They now want alal the proof that I catually paid, I sent receipts from them stating I had paid in full, but they will not accept this?? Why, They now want copies of bank statements showing the payment. Absolutely shocking and disgraceful- Ke…
1 star: Bad	I had booked a room in London a week in advance for my stay. I arrived at the location on the day of reservation at 9pm as planned and rang the doorbell. No one answered for 20 minutes. Called the number listed on the website. No answer. A man answered and told me to bugger off cause it wasn't a property for rent anymore. As it was late, I booked another hotel and left. Upon complaints, customer …
1 star: Bad	Due to covid-19 I need to cancel my London hotel booking. I contacted booking.com and was told to contact the hotel directly. The hotel told me to go back to booking.com. I have been trying since 9th June with no sucess. Looks like I'm going to be out of pocket to the sum of £163. So disappointed; Due to covid-19 I need to cancel my London hotel booking. I contacted booking.com and was told to co…
1 star: Bad	Due to government restrictions... We aren't allowed to use our apartment or travel, so after calling booking. Com 6 times regarding getting a refund for the accommodation, they had to call the apartment owner as it was a non refundable booking they said no refund no rebook at a later date they were quite happy to keep my money..... Booking. Com at first said they would cover the refund closer to …
1 star: Bad	The absolute worst experience EVER. I've essentially had £200 stolen from me because the venue would not refund me after COVID-19 meant all travel to the island was banned until September and Booking.com made zero effort to help with this. I've been trying to contact the venue since March (Now July) and zero response. Booking.com advised that I cancel it and they'd await for the restrictions to m…
1 star: Bad	Terrible customer service and inflexible policies. Refused to allow me to change the dates of a booking in London. Despite all the shows and exhibitions we had planned stillbeing closed. The customer service agent on their chat refused to give me a customer complaints contact and then ended the chat after I repeated this request. Don't book any hotel's with this service, they have no care for the…
4 stars: Great	I used booking a few times, never had had serious problems with the hosts, the reviews and descriptions mostly corresponded to what was written in the descriptions...; I used booking a few times, never had had serious problems with the hosts, the reviews and descriptions mostly corresponded to what was written in the descriptions...
1 star: Bad	Being a host, I regret to say I have also had a bad experience. A few weeks before the start of a reservation, it suddenly appeared to be +3 extra people, which exceed my legal limits. The guest was told, that it was no problem at all, I could charge extra cost. However, I do want to follow the applicale legal rules. The guest got more and more abusive, and booking.com did not reply to any of my …
1 star: Bad	Still taking bookings for non existent or closed hotels and then every single failed booking involves an hour long phone call to get a refund. Whats the word for when money is taken with no intention of supplying a service - oh yes the word is Fraud - or is it Theft This is how they treat keyworkers - they rip them off; Still taking bookings for non existent or closed hotels and then every single…
1 star: Bad	Awful, no help whatsoever. Booked a hotel for a couple of nights in May but obviously cancelled due to the pandemic. Received an email confirming free cancellation but the money had been taken and I cannot get a refund...pitiful customer service.; Awful, no help whatsoever. Booked a hotel for a couple of nights in May but obviously cancelled due to the pandemic. Received an email confirming free …
1 star: Bad	Wish i could give no stars! We booked a stay in Cambridge from 2nd to 5th July for elderly family members to stay for our now cancelled wedding. Since the lockdown started and it was apparent that we would be unable to use the booking we have contact Booking.com and the hosts Stay Beyond many times to ask for a full refund in compliance with the Competition and Markets Authority (CMA) guidelines …
1 star: Bad	Booked 5 hotels with Booking.Com, all hotels have agreed to refund or move booking to next year, only one hotel refunded to date, sent correspondence to Booking.Com & to the hotels in late May requesting to move booking to next year after our international flights were cancelled, plus the hotels are all closed at time of this review, should have been flying out of Australia today, because of the …
1 star: Bad	Worst company ever. Wil never book again. Infact I am going to start a Petition sgainst them as they have cheated so many people. Shame on this Company.; Worst company ever. Wil never book again. Infact I am going to start a Petition sgainst them as they have cheated so many people. Shame on this Company.
1 star: Bad	Poor customer service. The only interaction with booking.com is searching and making payment end of. I had an issue of being booked into a nonexistent room but booking.com never stepped in to resolve the issue. No response to my emails or inquiries.; Poor customer service. The only interaction with booking.com is searching and making payment end of. I had an issue of being booked into a nonexiste…
1 star: Bad	Don't use this for rental cars either!! I made a reservation 2 weeks in advance to travel to my wife's funeral with my daughter through this company. They allowed me to schedule pickup for the car at a time the rental company wasn't even open for business. When I came back the next morning to pick it up I was told my reservation was cancelled, because I didn't pick up the car on time!! If it wasn…
1 star: Bad	Worst booking experience I’ve ever had. Will never use booking.com again, would rather find shelter in a bin full of maggots than trust this company with providing me with accommodation. I feel like I’ve been scammed.; Worst booking experience I’ve ever had. Will never use booking.com again, would rather find shelter in a bin full of maggots than trust this company with providing me with accommod…
Dr de G; 1 star: Bad	I booked an available room in a guest house through Booking.com The guest house refused to honour the booking saying they had no rooms available. I complained to Booking.com who simply referred me back to the guest house and refused to take the blame for their online booking system failure.; I booked an available room in a guest house through Booking.com The guest house refused to honour the book…
1 star: Bad	Extremely disappointed with the service received by Booking.com. I booked accommodation in February for 25-27th June 2020 for my fiancés family as we were due to get married over that weekend. Due to Covid-19 restrictions, the wedding was unable to go ahead and staying in a different location was not allowed. I called up the property owner back in March to discuss options. She told me that this w…
1 star: Bad	The worst companies in the travel accommodation. Never book with then; The worst companies in the travel accommodation. Never book with then
1 star: Bad	Won't help us with booking. Just keep quoting t and Cs and asking us to contact the accommodation directly. When we do accommodation says contact booking.com! Our flights have been cancelled, the opera festival has been cancelled yet booking.com still expect us to pay in full for our accommodation and take children to verona against government advice which means no insurance. Have not done anythi…
1 star: Bad	We booked a hotel with booking dot com and they stole are 100 bucks and would give it back 100 and 10% i will never use them again! When we call them they just send us to different people and when we ask to goto a manager they dont answer the phone ...; We booked a hotel with booking dot com and they stole are 100 bucks and would give it back 100 and 10% i will never use them again! When we call …
1 star: Bad	Do not book this accommodation , as will not not refund due to covid 19 for our booking in april , and booking.com Wont refund either.; Do not book this accommodation , as will not not refund due to covid 19 for our booking in april , and booking.com Wont refund either.
Kevin Buinowski; 1 star: Bad	i was going to reserve a room for next year through booking. it showed me what the cost will be with taxes. when i got done reserving the room booking.com charged me for another 75 dollars. i cancelled the reservation fast has i can. i won't go through this company again.; i was going to reserve a room for next year through booking. it showed me what the cost will be with taxes. when i got done r…
1 star: Bad	We rented a pool - Camp Aliyah at Amadeo Cavite. They won't return your deposit as it is subject for approval. The reason they would tell is because you violated their rule when in fact do damage done in their property.; We rented a pool - Camp Aliyah at Amadeo Cavite. They won't return your deposit as it is subject for approval. The reason they would tell is because you violated their rule when …
Rick Smee; 1 star: Bad	I used this app to book accommodation in Portugal for a stay in March/April this year. Then the lockdown happened due to the Covid19 and the company and the hotel Arrifana Destination Hotel refused to issue a refund. I tried to engage with both parties and spent hours on hold, they never supplied an email to reply to, all correspondence from them was received from a 'no-reply' email. I have been …
1 star: Bad	More than 8 months ago I booked an accomodation in Alykes Zante, my flight was then changed by 1 day, and though the booking was booked as no changes since it was almost immediately after the booking was confirmed I asked can you ask the apartments to change from the 12th September to the 11th September (the request has been made 6 times in the last 8 months) no help has been forthcoming, I don't…
1 star: Bad	We booked a hotel through booking.com. The hotel refused to refund us even though our flights have been cancelled and also the Polish Government website states they are not accepting flights from GB due to Covid-19. Booking.com refused to take any responsibility and said they can't force the hotel to issue a refund as they aren't aware of the Polish Government's travel restrictions! I gave the wo…
1 star: Bad	I booked a hotel through booking.com in turkey. I was unable to travel due to Covid19 but the hotel refused to refund me even though my flights have been cancelled . Booking.com refused to take any responsibility and blamed it on the hotel. Please don't book the Istanbul Airport Durusu club hotel; I booked a hotel through booking.com in turkey. I was unable to travel due to Covid19 but the hotel …
1 star: Bad	Jet2 have cancelled our flight to Spain due to Covid 19. We had booked a partially refundable booking with a hotel with booking.com. We cannot travel as a direct result of Covid 19. The hotel will only refund 75 per cent of our money and offer a voucher for the rest. We have no plans now to travel to Spain so this is no good to us. Advice on the CMA website suggests that we are entitled to a full…
1 star: Bad	We tried to list our rental property on Bookings.com and it was a disaster. They aren't competitive with platforms like Airbnb and VRBO. They charge a very high commission, don't verify guests' ID's, don't provide insurance, and don't handle payments and deposits from guests. They allowed our first guests to walk away without paying which cost us around $500. They wouldn't respond to our messages…
1 star: Bad	So we reserved a place titled BEACH HOUSE IN HONOLULU. we had done a search for 4 children 4 adults. This popped up. The booking at the bottom said pay $2400 for 6 adults or pay $3200 for 6 adults 2 children. Pets are welcome. So this fitting out criteria I booked it and let them know we will be bringing a fully active service dog. First email from the place is telling me I need to get approval f…
1 star: Bad	Warning! Do not book your holiday through these people. They just blame the hotel or villa and are not willing to help or offer refunds. Really poor service. We could not get to Greece due to the covid 19 and our flights being cancelled and people from the UK not allowed into Greece at the time. Appalling company and service. AVOID AT ALL COSTS; Warning! Do not book your holiday through these peo…
1 star: Bad	On Tuesday, June 23, 2020, I began a price match claim with Booking.com. I received a reply from Jesus on the same day asking me to send over screenshots of the price I was charged, the price on the website, and the website's URL to verify the price. I replied to Jesus the same day and attached the information that he asked for. I received an updated e-mail on Thursday, June 25th stating that my …
1 star: Bad	I will NEVER be booking through this company again. My holiday was cancelled due to the coronavirus outbreak and they are refusing to refund me.; I will NEVER be booking through this company again. My holiday was cancelled due to the coronavirus outbreak and they are refusing to refund me.
1 star: Bad	Do not use Booking.Com!!!!! I booked a villa in Majorca with them - then I booked my flights . Only 3 hours later - I was told that the villa I booked was not available & that I needed to find another villa. I have spent 2 days trying to find a suitable alternative and NOT FOUND anything. All booking.com has done is offer me an AirBNB !!!!! Which has less bedrooms ( so we cant fit ) and NO POOL. …
1 star: Bad	I had booked a night on Saturday 20 June with booking.com in Southend on the sea, I paid to booking.com but hotel charge me as well. I try to resolve this issue but nobody wants to help. This is disgusting! I been booking with them for couple years but this is last time.; I had booked a night on Saturday 20 June with booking.com in Southend on the sea, I paid to booking.com but hotel charge me as…
5 stars: Excellent	I had booked a hotel with booking.com and due to Coronavirus I was unable to go. I had already paid for the hotel in full and it was a non-refundable hotel. I emailed the hotel and they said to contact booking.com themselves. I used the online chat service and connected to an advisor straight away. I informed them that I could no longer fly and within minutes they messaged back and said they had …
4 stars: Great	Used booking.com to book 3 villas on koh samui. Due to covid we were unable to fly. Contacted hotel and was told that they could offer us vouchers and nothing else. Contacted booking.com and after a few tries, got through. Said they would contact hotel and not worry as they would sort a full refund. It took some time, but to their credit ,a full refund was given . Top marks in my book. Have used …
1 star: Bad	Waste of time.Didnt get any direct answers and kept going round in circles.saying it was with booking.beds and they are within the company.Will never use them again.; Waste of time.Didnt get any direct answers and kept going round in circles.saying it was with booking.beds and they are within the company.Will never use them again.
5 stars: Excellent	Booked an apartment for 2 weeks in UK, June 2020 and had no issues from last minute booking to check in. The prices advertised are clear, not as mis-leading as Airbnb has been. Used booking.com numerous times and to date, it has been a good experience.; Booked an apartment for 2 weeks in UK, June 2020 and had no issues from last minute booking to check in. The prices advertised are clear, not as …
1 star: Bad	DO NOT USE BOOKING.COM! 1 star is too much. Zero customer service. The phone lines just cut you off. I'm trying to cancel a car rental, but can't get through. They just stole $126.76.; DO NOT USE BOOKING.COM! 1 star is too much. Zero customer service. The phone lines just cut you off. I'm trying to cancel a car rental, but can't get through. They just stole $126.76.
1 star: Bad	My friends and I booked a villa through this site and paid upfront the full amount. Obviously due to the covid situation this was cancelled. Booking.com said we had to contact the villa direct then proceeded to just ignore our emails. The villa owners straight upfront just said we wasn't getting our money back and now just ignore all emails sent to them. I feel that Booking.com should take more o…
1 star: Bad	I've used booking.com several times with no problem. we booked 2 weeks in Croatia from the 5th july. i appreciate no one ever imagined covid -19,but it happened. As our holiday came closer it was very hard to get through to them and when I did I was always told, too early to do anything, so I contacted several times over several weeks. I got very anguish as it got to only days before they automat…
1 star: Bad	The worst place to book online. This company Customer Service has became close to obsolete for individuals. The customers are now the properties. Never will consider again!! No support given, huge waiting on the phone for support, reply to messages with template emails and no solutions given. No refunds processed in time. just really hitting the bottom. I hope other companies take advantage of th…
1 star: Bad	Worst experience of booking apartment and even my booking was confirmed. I was there standing infront of apartment and no one was there to handover me key. Talked to customer services for 3 hrs no solution apart from check another place. Plus they hold my money for 7 day i had to give £100 to someone else in cash so i could stay in their place for night. Never trust this site.; Worst experience o…
1 star: Bad	Booking.com charges commission on almost any eventuality. Whether your property has been available or not, if you guests change their mind and whatever happens from the client side you are still liable for 18% commission, even though we will not receive anything. What a frustrating time dealing with the most unfair and fraudulent website. I will delete my account very soon. :((((; Booking.com cha…
1 star: Bad	Don't use this site as I booked twice with them , property never communicated with me and took the funds .I tried to get the refund , Booking.com said they are not the responsible. So lost £500 pounds on two bookings . ????????; Don't use this site as I booked twice with them , property never communicated with me and took the funds .I tried to get the refund , Booking.com said they are not the re…
2 stars: Poor	Terrible customer service. Never using this site to book a hotel ever again worse experience ever!; Terrible customer service.; Never using this site to book a hotel ever again worse experience ever!
1 star: Bad	I booked using this site .. but I had an aweful experience both with this site and hotel I stayed .. they lied to me about additional fee and all and when I called they failed to resolve the issue . Don’t book through this site ..; I booked using this site .. but I had an aweful experience both with this site and hotel I stayed .. they lied to me about additional fee and all and when I called the…
1 star: Bad	My booking got canceled by the hotel for free 4 months ago and even though i called booking.com and hotel couple of times they still didn't send my money back. I will try to solve this in a legal way and WILL NEVER USE BOOKING.COM AGAIN. DONT USE THIS WEBSITE, THEY STEAL YOUR MONEY. that simple.; My booking got canceled by the hotel for free 4 months ago and even though i called booking.com and h…
1 star: Bad	Absolutely disgusting i had a booking that i booked over a month ago for £49 it has now been changed to £98 they cant tell me why and said i would need to send photo evidence to say it was £49 , FRAUDSTERS DO NOT USE; Absolutely disgusting i had a booking that i booked over a month ago for £49 it has now been changed to £98 they cant tell me why and said i would need to send photo evidence to say…
1 star: Bad	I have been trying to get a refund since February for my stay in Spain. They sent me on a wild task of getting proof of transaction in euros (they charged me in GBP) and refuse to give me a refund until I do. Even my bank has said they have charged me in GBP not euros. I’d book through another site if you want a trusted, reliable hotel site.; I have been trying to get a refund since February for …
1 star: Bad	I've enjoyed using booking.com for years. Recently I made a reservation which included "free cancellation." The confirmation said "you may now modify or cancel your booking until checkin." When I tried to make a change, the system said the booking became nonrefundable 24 hours after I booked it. While the property might agree to a change, I booked this specifically to have flexibility.; I've enjo…
1 star: Bad	Booking.com have charged double for a hotel stay. They will not answer phones! They will not answer emails! They will not answer resolver queries! They have stolen money!; Booking.com have charged double for a hotel stay.; They will not answer phones!; They will not answer emails!; They will not answer resolver queries!; They have stolen money!
1 star: Bad	Be aware before booking anything on this site. 1st of all anywhere in the Mediterranean they all share the same checking in and checking out times of (check-in at 14:00 hours and checkout at 11:00 hours) so when booking.com gives you many selections then do not get false hopes in checking in early and checking out later in the day as you will only get a message from the host telling you otherwise…
1 star: Bad	Covid 19. Familiar tale. Hotel cancelled and They make it impossible to contact them and keep your money.; Covid 19. Familiar tale. Hotel cancelled and; They make it impossible to contact them and keep your money.
1 star: Bad	Confirmation Number booking.com 3511483249 friday 17 july – sunday 19 july 149,04€ I am a faithful client of booking.com for over a decade now. Both me and my wife, when we travel individually, we use booking.com for our hotel reservations. It so happens that this past February I booked a double room for a 2 day stay in the PIRITA MARINA HOTEL - TALLINN (Estonia) from the 17th till the 19th July.…
1 star: Bad	They use every possible excuse to wriggle out of refunding. We had to cancel 3 night hotel booking due to Coronavirus state of emergency being declared and FCO warning against travel to Spain. Apparently I didn’t cancel ‘in the right way’ despite showing proof of contacting hotel directly and via the Booking.com app. Booking.com are ok when things run smoothly but if something goes wrong and you …
1 star: Bad	Not Covid 19 friendly for rebooking. We had to cancel a two night stay due to the wedding being cancelled. Booking.com refused to all us to rebook for the new date and kept all our payment.; Not Covid 19 friendly for rebooking. We had to cancel a two night stay due to the wedding being cancelled. Booking.com refused to all us to rebook for the new date and kept all our payment.
1 star: Bad	Booked a villa through these crooks, Villa owner took €650 which was fully refundable and now guess what, offered voucher, now refund will take a month, they also said I didnt pay a deposit, Booking.com then wash their hands of it and say you must contact villa company.; Booked a villa through these crooks, Villa owner took €650 which was fully refundable and now guess what, offered voucher, now …
1 star: Bad	I had very bad experience with the Booking.com.I tell for everybody ,this company never returns full amount for the reservation.That is not free cancellation trip, they only promised.I very sad ,that is unfair!!! Irina. June,20/2020; I had very bad experience with the Booking.com.I tell for everybody ,this company never returns full amount for the reservation.That is not free cancellation trip, t…
1 star: Bad	Poor refund system that drastically affects customers. I booked 5 nights for next week, but the hotel was not accepting guests even though I was able to choose those dates. This would partially be the hotels fault, but they have nothing to do with my review. The hotel had great coms and if they'd received the money they would've given it straight back. However, booking are in charge of it and it …
1 star: Bad	Absolute shocking company to deal with. Still waiting for a full refund 3 months after booking a hotel through Booking.com. Hotel confirmed the refund can be paid but Booking.com stalling and refusing to refund. Made multiple telephone calls and email correspondence to try and resolve but met with shocking customer services and false promises. I would not use this company again or recommend. Ther…
1 star: Bad	If you like a good experience booking a trip, do not use this company! Really bad customer service, never respond in the manner you want, ignore the actual question you ask, and when you get left stranded outside a hotel in another country because they said no booking was ever made is a complete and utter joke. 2 kids and partner with me left on the streets with no help from this company. They sh…
1 star: Bad	Poor customer service support. Unwilling to help if any issue arise while travelling or if you need to cancel your holiday.; Poor customer service support. Unwilling to help if any issue arise while travelling or if you need to cancel your holiday.
1 star: Bad	I booked the trip before corona, have asthma and can’t travel and they are not giving me a refund. Terrible customer service and completely incompetent dealing with corona situation; I booked the trip before corona, have asthma and can’t travel and they are not giving me a refund. Terrible customer service and completely incompetent dealing with corona situation
1 star: Bad	If something happens and you need them they won’t properly respond and refer to the accommodation. Be wise and book directly at the hotel website!; If something happens and you need them they won’t properly respond and refer to the accommodation. Be wise and book directly at the hotel website!
1 star: Bad	Dreadful company, no assitance to refund a room in Italy, obviously cant travel due to global tourism restrictions. Only interested in thier commision, loayalty means nothing. Used them for years, wouldnt go near them again for a gold clock. How you act during a crisis is what defines you. Booking.com, you have been disgraceful.; Dreadful company, no assitance to refund a room in Italy, obviously…
1 star: Bad	Really awful customer service. Completely unreasonable in their approach to COVID-19. Lost over £1000 because they excluded UK travellers from the force majeure policy even though we are advised not to travel for non-essential reasons. I feel this company has NOT approached this COVID-19 situation in a fair or reasonable way.; Really awful customer service. Completely unreasonable in their approa…
1 star: Bad	Don’t use or trust this company. If you are not able to travel for any reason, informing them well in advance, they are not interested in trying to help their customers. I’ve lost over £2000. Stay well away; Don’t use or trust this company. If you are not able to travel for any reason, informing them well in advance, they are not interested in trying to help their customers. I’ve lost over £2000.…
5 stars: Excellent	Well cannot grumble about this company ! Had great experiences all round both in prompt handling of issues with accommodation booked and more recently arranged and received refund in 48hrs for a “ non refundable “ booking not like some companies expecting you to wait a year !!! - “ alpharooms “; Well cannot grumble about this company ! Had great experiences all round both in prompt handling of is…
1 star: Bad	Hello, Booking.com On 19/12/2019 I order for me and my wife, 2 AR Paris-Orlando flights to Booking.Com who accepts my order and collects the invoice. Flights for departure on 21 April 2020 and return on 11 June 2020 of 1677,40€, paid on 19/12/19 and cashed on 31/12/2019 as follows = ''1592,40€-ticket + 80,00€ seats ''. Then the Civid19 blocks everything. So be it. But, because there is a "BUT": 1…
1 star: Bad	Trying to get my refund for 6 months now. The worse company to deal with I would never ever use this service again; Trying to get my refund for 6 months now. The worse company to deal with I would never ever use this service again
1 star: Bad	Would give them less than one if I could. They will attempt to double charge, I have experienced this on multiple occasions. Try finding the phone number on the website, won't happen. If you can call them, expect a VERY long wait. The people on the phone are NOT English speakers, whatever you have to do will take a looooong time, if you can get it done at all, and you will have to repeat yourself…
5 stars: Excellent	The service we have had in resolving our issue has been fantastic. Booking.com have emailed when they said they would, even had a phone call to make sure we are happy with the service and answer any question. We have received a full refund of our booking that was cancelled due to the pandemic, in what I would consider, a more than acceptable time scale, considering the staffing pressures all busi…
1 star: Bad	My daughter recently booked accommodation through Booking.com and ended up staying in what I can only describe as a local doss house. There were men coming and going to the premises smoking weed and a fight broke out in the hall in the middle of the night. To say she was terrified is an understatement. I contacted booking.com as felt they really shouldn’t be advertising such accommodation and was…
1 star: Bad	Awful! Booked with booking.com and they said I had til 3:43 pm to cancel free of charge. I tried to cancel at around 11 Am and that offer was removed from my app. They are still trying to charge me a cancellation fee of $104!! ?????? DONT USE THEM!!; Awful! Booked with booking.com and they said I had til 3:43 pm to cancel free of charge. I tried to cancel at around 11 Am and that offer was remove…
1 star: Bad	Terrible customer service. Always hang up on you after waiting a long time to get through? I've been chasing them for a refund for nearly a week. When it's so simple and straightforward. Waited 3 days for them to sort it out no correspondence from them at all. 3582.141. 552; Terrible customer service. Always hang up on you after waiting a long time to get through? I've been chasing them for a ref…
1 star: Bad	Like so many other reviews on here it seems Booking.com really dont care when things go wrong and thats also the case when they get it wrong too! We recently booked a private villa in France and were advised to introduce ourselves to the owner which thankfully we did as he quickly told us the villa was aready booked on the dates we wanted to go and we should contact booking.com for a refund(the s…
1 star: Bad	They leaked my MasterCard information and I was left charged for a hotel in Amsterdam ( I live in Canada and can’t even go overseas cause of covid). Wouldn’t trust them again!; They leaked my MasterCard information and I was left charged for a hotel in Amsterdam ( I live in Canada and can’t even go overseas cause of covid). Wouldn’t trust them again!
1 star: Bad	I have used Booking.com many times and mostly for the free cancellation booking. This year I had 3 booking in advance and due to Covid needed to cancel. 2 bookings were free cancellation however the hotels had taken a payment. Booking.com have not made any efforts to help me with my refund enquiries. After several failed attempts, I have had to go to the creditcard dispute. The other booking was …
4 stars: Great	Wow I might have to either upgrade or downgrade this review when I get my credit card statement and see exactly what charges have and/or have not been posted for this month. A wedding for my niece in June 2020 was cancelled due to Covid 19. Booking.com emailed me to say that the property I was booked at for three nights agreed to cancel for no charge and no extra cancellation fees! I was very hap…
5 stars: Excellent	Booked with these guys accomodation several times. The process is so easy and smooth. Quick response to requests.; Booked with these guys accomodation several times. The process is so easy and smooth. Quick response to requests.
1 star: Bad	Had a terrible experience with Booking.com. Can't get a reply email from them to try to resolve the issue. I have used them twice and will never use them again.; Had a terrible experience with Booking.com. Can't get a reply email from them to try to resolve the issue. I have used them twice and will never use them again.
1 star: Bad	We were supposed to be going to Berlin to stay at the "Holiday Inn Berlin City Centre" at the end of May. The stay was obviously cancelled by the hotel. When we requested the refund of the £650 we paid through booking.com they offered us a voucher but we wanted our money back. After many unanswered emails and phone calls requesting a refund to the hotel we asked booking.com to step in and ask on …
1 star: Bad	Do not use this company. When things go wrong they will make it extra long to give you a refund. Customer service is poor and I will never use them again!; Do not use this company. When things go wrong they will make it extra long to give you a refund. Customer service is poor and I will never use them again!
1 star: Bad	Terrible service Rude customer services.Cancelled a holiday a week before remainder of balance due they acknowledged the cancellation and then informed me we hadn't cancelled !!!Totally unhelpful will never use again or recommend anyone else to use.; Terrible service Rude customer services.Cancelled a holiday a week before remainder of balance due they acknowledged the cancellation and then infor…
1 star: Bad	Having messaged Booking.com since March about a booking this June & accumulated over 10 pages of notes I finally have to concede that they have no regard for their clients. All they do is keep trying to pass over to the property owner, who has been less than helpful. They finally got us to agree to a credit voucher by implying we would lose our money but when we tried to book for next year have n…
1 star: Bad	Like so many new comments on here Booking.com have let themselves down badly. I always go to them first and have used them to book places all round the world. I was meant to be In Europe for the Euros football, it’s cancelled as we are all aware. I can’t fly there. They have told me Hungary have brought in a new policy which says I can travel, I can’t because I don’t have a flight it got cancelle…
5 stars: Excellent	Booking.Com helped out getting my money refunded when the motel we booked ended up having bedbugs. The motel management refused to do anything, but Booking.Com secured a refund in short order.; Booking.Com helped out getting my money refunded when the motel we booked ended up having bedbugs. The motel management refused to do anything, but Booking.Com secured a refund in short order.
1 star: Bad	Very disappointed and never going to use Booking.com again! My flights from London to Azores were cancelled due to Covid19 and the only refunds I was refused were for booking.com reservations. Not only I find it unfair to take advantage from such an extraordinary situation to make some money, but they didn't even bother to reply to my messages disputing this. I find their lack of communication wi…
1 star: Bad	After years of loving Booking dot Com I was very disappointed with their complete failure to help get money back from hotels for bookings I cannot use due to the pandemic. It seems Booking dot com will not honour its own Terms and Conditions nor the law around frustrated contracts.; After years of loving Booking dot Com I was very disappointed with their complete failure to help get money back fr…
1 star: Bad	Absolutly useless, I am emailing trying to find out information about a villa to see if it's legit and they keep replying by ignoring the question and asking me for a booking code when I repeatedly tell them I havnt booked yet, no custoner care at all; Absolutly useless, I am emailing trying to find out information about a villa to see if it's legit and they keep replying by ignoring the question…
1 star: Bad	Utterly shocking customer service and potential bank fraud *** after confirming my refund they then asked for me to send a bank statement with all my account details as 'they don't hold card information'. They have since issued a refund to my updated card details I entered after I made my booking and have access to all my bank information for no good reason. Complete fraudulent activity. Will be …
3 stars: Average	I'm posting this because many people, I suspect, will be alarmed that pay when you stay, isn't what you'd expect. I booked a hotel 4 months away choosing the free cancellation, pay on arrival but then had a pending transaction flare up on my bank account, which I was unprepared for. Booking.com replied (and I summarise) this is a pre-authorisation the property make to have a guarantee of the book…
1 star: Bad	I give this company negative stars!! I cant say its all customer services staff as some have tried to be helpful but i just keep getting the same generic email back telling me to contact the property owner myself with a phone number and an email address that doesn't work. Just going round in circles and Im still waiting for someone to give me the complaints procedure details but just keep getting…
1 star: Bad	I booked a hotel through this disgusting company never again !! I’ve been told if my hotel isn’t open then all they can offer me is a voucher to be used within a year and only at the same hotel !!!; I booked a hotel through this disgusting company never again !! I’ve been told if my hotel isn’t open then all they can offer me is a voucher to be used within a year and only at the same hotel !!!
1 star: Bad	Absolutely disgusting! No formal complaints procedure a manager that does not listen or comprehend the information you are providing! Iv used them on a number of occasions and I have never known them to be this bad. I am not sure what has changed in this company but it simply does not work!; Absolutely disgusting! No formal complaints procedure a manager that does not listen or comprehend the inf…
1 star: Bad	Very bad!!! A day before checking-in, we received an email saying that it was an issue when booking and now the price is more than double!!!! I dont like to advertise but Airbnb is much more professional than Booking.com.. TO AVOID!!!!!!; Very bad!!! A day before checking-in, we received an email saying that it was an issue when booking and now the price is more than double!!!!; I dont like to ad…
5 stars: Excellent	A recent review of holiday companies had booking.com in the top ten. I now know why. I had trouble retrieving my deposit from Italy after cancelling a booking offering free cancellation. Not a quick process but booking.com did not try and stall and have now refunded the deposit. Top marks and pleasant to deal with; A recent review of holiday companies had booking.com in the top ten. I now know wh…
5 stars: Excellent	I trust booking.com. of all the companies I have used, this is the one I trust and is now my first place to go to. The app is straight forward and easy to use. All difficulties resolved in a timely manner with no comeback. Prices are good.; I trust booking.com. of all the companies I have used, this is the one I trust and is now my first place to go to.; The app is straight forward and easy to us…
1 star: Bad	Worst service ever!! We booked a hotel in Lisbon(EasyHotel) which was cancelled due to the ongoing pandemic but they did not give refund and even have the guts to send us the bill receipt. We mailed them couple of times with no response. We then contacted Booking.com and they said they can't help. After talking to them for few minutes they finally agreed to send a mail to the property. This was 4…
1 star: Bad	Extremely unprofessional customer support (or should I say complete lack of customer support). I was wrongfully changed by a property and have been trying for 3 months to receive a refund. I have had to call in excess of 10 times spending an hour on the phone each time. I have been given various misinformation and empty promises by various members of their support team and still no resolution. Th…
1 star: Bad	I have listed 2 properties so this review is from a property manager. Booking.com are very hard to deal with. The platform is not user friendly e.g. changing a simple thing like a cleaning fee is listed under "policies" not "pricing" which takes ages to figure out! If someone has an extra guest, you have to contact them and they won't update it - other platforms you can just change it and the gue…
2 stars: Poor	Had to cancel an apartment in Singapore due to covid 19, first they took the payment far to early then I can’t get it back although it’s well with in the cancellation period. Iv lost over £400 Iv phoned, emailed ! Booking.com said it was back on my card but it’s not then they said it was back on a previous card it’s not now there saying I need to contact the owner in Singapore myself !! No joy th…
1 star: Bad	Lost over 2000 EUR due to corona virus restrictions for my Italy booking when I WAS ASSURED by booking.com agents that I'll get my money back if the government restrictions apply (and they still apply at this moment). But contacted them through chat and ALL OF A SUDDEN the forced circumstances on my reservation don't apply anymore. Will not use again - and plus, will remove my listing that's earn…
5 stars: Excellent	had to cancel a reservation due to the corona virus it was a no refundable hotel in amsterdam booking.com worked hard to get something done now i have a voucher for the same hotel for next year and it's good till the end of august thank you booking.com; had to cancel a reservation due to the corona virus it was a no refundable hotel in amsterdam booking.com worked hard to get something done now i…
1 star: Bad	I booked last Nov/Dec NOVA APARTHOTEL, Budapest (realised later, free cancellation ran out end Jan 2020 for that a 15 Euro discount!). Due to travel mid June. In March at the start of Covid-19 I started enquiries with responses, 'too early to say' from the Nova Aparthotel via direct contact, Booking.com WOULDN'T COMMIT/RESPOND (even though apparently THEY were holding my money). Following many fu…
1 star: Bad	DO NOT USE THIS COMPANY. I had three bookings for Italy. Italian border closed and the Australian border closed so I physically couldn’t get to the accommodation. Their COVD policy states that if a customer can’t get to an accomodation, because of border closures, they would be offered a refund. In my case, while this condition was completely applicable, they wouldn’t provide a refund because the…
1 star: Bad	I travel a lot for work and often stay in a budget hotel or b&b. Three times recently I’ve booked for accommodation and each time when I’ve contacted the accommodation to confirm time of arrival the owner knew nothing of the booking (they were closed due to Covid) On two occasions Booking.com had taken the full payment on my card at the time of booking, several weeks before arrival. Each time I h…
1 star: Bad	DO NOT USE BOOKING.COM!! They do not care about customers. The customer service is shockingly bad; had to wait for hours multiple times to speak with someone who then said there was nothing they could do despite not being able to travel to the country where the hotel is booked. The hotel customer service was equally appalling and should not be a hotel endorsed by Booking.com. As the booking agent…
1 star: Bad	Absolutely horrendous! I am looking to get refunded from a hostel that cancelled my trip cause they were unable to accommodate me due to COVID-19. The trip was supposed to take place in April!! It's now June and I'm still due my refund. There seems to be ABSOLUTELY NO ONE at booking.com that is capable of enforcing the hostel to refund me. Absolutely embarrassing service. I won't let go until I h…
1 star: Bad	This booking.com have robe me $670 just like that. I have to cancel my staying 6 weeks before and they won’t refund my money. I have lost my job during coronavirus I’m single mother caring for 3 young children And those people just robe me Just like that wish is week rent and food for my family and you just took it Shame of you. Now that’s is criminal with put paying justice maybe we have contact…
1 star: Bad	A bad experience with booking.com. They are very specific of collecting you credit card information at no charge and free cancellation. THIS IS NOT TRUE. if you have to cancel they will tell you that they can’t cancel the reservation and that there is a policy of 7 day cancellation. A Super bad experience with this company. So now I have to dispute the cancelation with the hotel. They can’t do th…
1 star: Bad	IF YOU ARE THINKING ABOUT USING BOOKING.COM, PLEASE READ CAREFULLY. I guess in the future, I will read google reviews before I venture out to use another new company. This company, BOOKING.COM, is only about one thing, getting your money. Once the money or CC number is obtained, they are highly skilled at passing responsibilities or problems off onto the vendors. Booking.com has no interest in th…
1 star: Bad	booked with them for May in Spain and they passed the blame to the hotel who then passed it back to Booking.com. Both have offered vouchers for future travel and in light of the appalling way they have both reacted. We would never use this company again. Booking.com are unlikely to survive this crisis due to their lack of customer service and corporate greed to keep customers money. Failure from …
1 star: Bad	For several years I have used Booking.com on a regular basis for booking foreign holidays and hotel rooms in various parts of the UK. Generally I have been pleased with the service. In early May I and six others had booked 4 days in Krackow in the Sodispar Dunajewskiego apartments. With the closing of the Polish border due to Covid it became apparent that the holiday could not go ahead. There was…
1 star: Bad	shifts blame constantly, doesnt take responsibility as third party, and claims covid money from the government when they still make big profit. disgusting.; shifts blame constantly, doesnt take responsibility as third party, and claims covid money from the government when they still make big profit. disgusting.
1 star: Bad	Unable to claim on insurance if booked with booking.com My insurance provider says they want confirmation that I didn't attend a property because of corona. The hotel says we won't talk to you only booking.com. Booking.com say we won't contact hotel as the date has passed. Not helpful. I wish I had booked directly, and I will do this next time; Unable to claim on insurance if booked with booking.…
1 star: Bad	We have used this company many times before, but covid has made me see this company for what they are, fraudulent. Australian borders closed, as was the Greek borders, so no chance of getting to the hotel. Once money is received, they think our money becomes theres, no customer care regards refunds. Booking.com Just send an email to the hotel, then thats it. No interest at all, emails don't get a…
1 star: Bad	I'm rating Booking.Com as 1 star because I have no way to 'talk" to them. It's all through email that goes around in circles. All my research suggest Booking.Com do not pay the hotel until 24 hours after you arrive, Therefor they hold all the money. Is I cannot travel due to my governments Covid 19 travel bans I believe Booking>Com should refund my money or offer a voucher with them for future tr…
1 star: Bad	Booked me into an already fully booked hotel so that I had to find another [hotel] at last minute after I had already arrived, and at 11pm at night. When I requested a refund for the difference as the last minute booking cost me 200 euros extra they flat out refused.; Booked me into an already fully booked hotel so that I had to find another [hotel] at last minute after I had already arrived, and…
1 star: Bad	I booked a room with a 24 hour free cancellation policy in Croatia and unfortunately had to cancel as I was e mailed by last minute.com that the flight and therefore transfers etc However I was still charged £33 or just under by Booking.com. Can’t get in touch with them. So bad customer service all round.; I booked a room with a 24 hour free cancellation policy in Croatia and unfortunately had to…
1 star: Bad	Absolutely disgusted by the way this company has treated it’s customers during the pandemic. Refusing to refund people & stealing their hard earned money. Refused to refund my money when my flights were cancelled due to COVID19. All other travel companies have issued full refund so why can’t booking.com?; Absolutely disgusted by the way this company has treated it’s customers during the pandemic.…
1 star: Bad	I have used booking.com for several years now. Up until now, the only complaint I had was that the booking.com price was sometimes higher than the price I would find if I went directly to a hotel's website. But with two recent bookings, I had much bigger problems. These were both for extended stays at what appeared to be for-rent-by-owner type listings. Before I clicked the button to finalize the…
1 star: Bad	Customer service is worse than useless, this has been a time for companies to step up sadly not booking.com £384 lost; Customer service is worse than useless, this has been a time for companies to step up sadly not booking.com £384 lost
1 star: Bad	Extremely disappointed with customer service that I received today from MICHELLE ! We had a booking with a hotel through booking.com as we were going to a near by concert venue. Hotel was happy CAMPANILE GLASGOW to change dates of hotel booking due to the concert being rescheduled due to COVID -19. Booking.com would not help in anyway and stated as the booking had a no cancellation policy they co…
1 star: Bad	As many others have detailed here already, I've had the misfortune of dealing with a booking.com reservation during the COVID-19 pandemic. My reservation was made many months before the pandemic and resulting quarantine/travel measures were put in place. 34 days before the reservation I decided it was highly unlikely we would be able to travel so I contacted the property for a refund (I *did* hav…
1 star: Bad	If I could do no stars I would. I have used booking.com in the past and have been satisfied. However, amidst this pandemic I have seen how bad their service actually is. It seems they do not want to take responsibility for anything by consistently bouncing me back to the hotel chain. To say that I am disappointed is an understatement. They have point blank refused me a refund due their policy. I …
1 star: Bad	can only agree with what so many people have stated in the last few weeks. I also had to cancel an accommodation due to Corona, and no refund or change in date was offered. Even competing portals where I had expected problems (specifically hotels.com) generously offered a voucher valid for a year, even for bookings that were not actually refundable. Booking only looked at today's profit - as a re…
1 star: Bad	We have a dispute with a booking at the Country Living Hotel Lansdown Grove, Bath made through Booking.com. They said a refund was made but NOTHING appeared on our account and we have double checked ! It is IMPOSSIBLE to reach the hotel by telephone or otherwise. Booking.com has NOT been able to provide an assistance of any kind and keeps bouncing us back to the hotel... We are profoundly dissati…
1 star: Bad	Do not use this service. They do not care about customers. If you have a dispute with a booking, they will pass the buck to the property owner claiming it is out of their hands and up to you to settle with the property owner even though they are profiting from the transaction. I made a booking in Italy and chose the no cancel option never thinking a pandemic would prevent travel. Even under these…
1 star: Bad	I've booked through booking.com and we are also hosting our Apartment House on booking.com - overall, a terrible service! They give absolutely ZERO Support, yet demand up to 30 % booking commission (other services take 3 - 5 %). We changed ownership of our Apartment House in December. It took us until February (!!) and 7 hours on the Phone with someone from booking.com in San Francisco (we are in…
4 stars: Great	I'm using Booking to choose hotels, it's the best way if you want to stay in hotel or find hostel. It's a little bit more expensive than with Airbnb, but I don't like an idea to stay in the someone's unit.; I'm using Booking to choose hotels, it's the best way if you want to stay in hotel or find hostel. It's a little bit more expensive than with Airbnb, but I don't like an idea to stay in the so…
1 star: Bad	Disgusting !!!!!! No refund I’ve kept arguing as unable to travel and they refuse to refund me. I’m so angry Yeah yeah it’s non refundable I booked in 28 November 2019 Did I know I couldn’t travel NO Give my money back you thieves; Disgusting !!!!!!; No refund I’ve kept arguing as unable to travel and they refuse to refund me.; I’m so angry; Yeah yeah it’s non refundable I booked in 28 November 2…
1 star: Bad	Do not book through booking.com - they are not following there own terms and conditions of force majeure! We had a property cancel our booking due to covid-19 but refuse to refund the money?!!!? How is this legally possible? We will be taking this further and want to warn others to stay away!!!!; Do not book through booking.com - they are not following there own terms and conditions of force maje…
1 star: Bad	Booking.com have been really unhelpful with our cancellation of our honeymoon. We are meant to be now staying in Port De Sóller but our non-refundable booking means we have lost out on over £1000 even though we are unable to travel due to covid19. They won’t even allow us to change the dates to later in the year!! Hotel Boutique Minister also refusing to refund or change dates. BEWARE of booking …
5 stars: Excellent	Before Covid 19 pandemic, I was able to go a lot of places just by using booking.com. It was a roller coaster experience! After this pandemic, I would reaalllyyy have my bags ready and use this app again!; Before Covid 19 pandemic, I was able to go a lot of places just by using booking.com. It was a roller coaster experience! After this pandemic, I would reaalllyyy have my bags ready and use this…
1 star: Bad	Shame on booking.com I struggled for over 6 weeks with trying to change or waive cancellation fee due to covid 19 for my trip to Athens. I contacted them constantly and the accommodation provider who ignored emails and phone calls. As I had paid in full they kept the fee. I have used them for many years but will think twice in future they were unhelpful.; Shame on booking.com I struggled for over…
4 stars: Great	I've been using Booking.com almost religiously for a few years now, and will always be in awe of the option that allows you to pre-book with free cancellation up to the day before your trip. This website is my first choice when making travel plans, and I've yet to be disappointed. I've found many a great place to stay with this site.; I've been using Booking.com almost religiously for a few years…
1 star: Bad	Unfortunately, because of the Covid-19 pandemic and lockdown in New Zealand we had to cancel all of our accommodation bookings. We made just two bookings with Booking.com for the same accommodation and cancelled both of them (we have emails that confirm this). Unfortunately, Booking.com are in denial that we cancelled one of the two bookings and commented that it was assumed "we were coming to ho…
1 star: Bad	Booking.com cancelled my booking in error. They are refusing to refund me for THEIR error. Two months of back and forth contacting customer services... On Friday they finally agreed to refund me, then three days later they are refusing again. I will now be taking legal action against them. I have been a loyal customer for years and I am appalled at the customer service I am receiving and the lack…
1 star: Bad	Give me back my money and stop telling me lies. I am not your charity giving you hundreds of pounds for free; Give me back my money and stop telling me lies. I am not your charity giving you hundreds of pounds for free
1 star: Bad	Very Poor experience. Our entire holiday was cancelled due to COVID-19 and we were refunded, even from Ryanir. Only booking.com would not refund any of our hotel booking fee despite the hotel in France not being open and not being able to confirm that they would be open for the date of our stay. Also when cancelling the booking, the website is misleading, claiming that it will not cost you anythi…
1 star: Bad	I used for my business trips a few times and will not recomended. Had too many problems and when I complaint once I was offered no resolution.; I used for my business trips a few times and will not recomended. Had too many problems and when I complaint once I was offered no resolution.
1 star: Bad	In times difficult for all airlines and hotels due to Covid-19, many of them showed liability to their clients/passengers and assisted them in getting a refund. I regret to say that Booking.com - the largest hotel reservation system - was not among them. We had a trip to Seychelles in April 2020, which was duly organized almost a year before when nobody expected what would coronavirus cause our t…
2 stars: Poor	I have used booking.com for many years without complaint. Recently, however, things seem to have changed. Customer service is nonexistent, a phone number impossible to find, emails are not answered. On 2 separate occasions (one of them a few days ago), I booked hotel rooms advertised as offering ''free cancellation'' and ''no prepayment required''. The properties proceeded to charge me the full a…
1 star: Bad	UPDATE 17.06.20 - Asked to be patient by Booking.com as the accomodation was looking into a full refund and a week later the accomodation finally responded (but never to my direct contact) to booking.com customer service that it is unable to reach a decision and how did I wish to proceed. In other words, I had to accept losing £152 or 169€, or wait until July which would mean the accomodation cou…
1 star: Bad	I booked a hotel for a one night pre cruise stay in Piraeus for July this year. My cruise has been cancelled along with my BA flights due to covid 19. My cruise company moved my cruise to July next year and I will re book my flights nearer the time. I contacted Booking.com to ask them to change the date on the hotel booking but they refused as it is a non refundable booking. I contacted the hotel…
1 star: Bad	Never again will I ever use booking.com It now less than 2 days until our reservation in Zante Greece. NoT once have they emailed, phoned or messaged me, to update me on the status of our holiday booking. I have messaged them my self and all they say are speak to the hotel directly. Absolutely disgusting service no mention of how or when we will get a refund; Never again will I ever use booking.c…
1 star: Bad	I will never ever use bookings.com again I had to cancel a booking due to coronavirus and over 3 months of calling and complaining they were giving me mixed messages and promise about my refund and refused to take responsibility; I will never ever use bookings.com again; I had to cancel a booking due to coronavirus and over 3 months of calling and complaining they were giving me mixed messages an…
1 star: Bad	I have used booking.com for years and book all of my hotels for work with them but I will never use them again. We booked a house In Germany for a rally event in Daun which we have attended for the last 7 years but the event has been cancelled and all travel because of coronavirus but they wont refund the deposit. I have been trying to change the to next year but I cannot get a reply. They want f…
1 star: Bad	Just to set the record straight I have been a loyal customer of booking.com for over 3 years, have used countless times and have genius status, but after my first time of trying to resolve an issue with their customer service department, I will vow never to use this company again. We were unable to travel to Morocco due to the Moroccan government suspending all flights in and out of the country. …
1 star: Bad	MISLEADING, HIDDEN CHARGES, GOT CHARGED 60$ FOR A ROOM I DID NOT EVEN GO TO, AVOID IF POSSIBLE; MISLEADING, HIDDEN CHARGES, GOT CHARGED 60$ FOR A ROOM I DID NOT EVEN GO TO, AVOID IF POSSIBLE
4 stars: Great	Good communication throughout, I was notified by email 29th April that our hotel booking for end of May was cancelled and opted for a refund which was very straightforward. Would be 5 stars but upon asking how long the refund would take I was incorrectly told it would be 7 to 12 days and to contact them after 15 days if I had not received anything. I did so and was then told the refund would be p…
5 stars: Excellent	Fantastic! Always first choice worldwide!; Fantastic! Always first choice worldwide!
1 star: Bad	I am a partner of booking.com. This mean I advertise properties on booking.com.My properties have an average 9.8 score. Reading so many negative reviews I can sympathise with you all. They are not only treating guests poorly but also partners. I have not received money from booking.com that should have been paid by April 9th 2020 After over a dozen phone calls and many emails I still have not rec…
5 stars: Excellent	I had booked a ferry to Ireland for July this year to go on a road trip around Ireland. I used Booking.com to find a number of hotels around Ireland. I found the system easy to use and got a variety of excellently priced hotels/B&B's around Ireland. About a 6 weeks ago through booking.com, one of the hotels told me they had to cancel the booking due to COVID-19 (it was a B&B and the owner had bee…
1 star: Bad	We booked accommodation through Booking.com last September but we never stayed at the Kivotos Santorini - the full price for the accommodation (5 nights stay) was kept by the hotel, as last year, full payment was taken from our credit card. It was impossible to travel to Santorini last month, as our flights were cancelled in April due to the Coronavirus, plus to date this hotel hasn't reopened. D…
1 star: Bad	Booked a hotel in Manchester in March for my father who lives in Spain! He was due to visit to meet his new grandson. His flights got cancelled and Spain was on total lockdown due to Covid-19 so he was obviously unable to get here. Booking.com refused to refund. Disgusting as this is a world pandemic and he would have been here if he could . Totally out of his control, now nearly £700 down. Will …
1 star: Bad	I had a hotel booking through Booking.com which I cancelled in March. I was supposed to received my refund within a week, but never did. I emailed Booking.com and the hotel numerous times regarding the matter, but neither bothered to respond. Luckily, my credit card company was able to assist in recouping the money.; I had a hotel booking through Booking.com which I cancelled in March. I was supp…
2 stars: Poor	I booked through booking.comas have done a few times in the past, we'll never again. Booked stay inn at Manchester for June as we were going to the arena all booked in 2019. Due to covid the date changed to 2021 so I contacted booking.com 1st week in April to re-arrange date as I'd tried the hotel number & the email address on the website was incorrect. Stephen at booking.com told me he would con…
1 star: Bad	Booked accommodation for a holiday that was cancelled due to COVID-19. Booking.com "negotiated" with the accommodation provider on my behalf to change my travel dates but the accommodation provider was "unable" (more like unwilling) to do this and chose to just pocket my money instead. I was charged not only the deposit amount but the full amount for the entire stay, car hire PLUS an additional f…
1 star: Bad	booking.com refuse to waive resort fee during COVID 19 when all the resort facilities are closed is a bad business tactic. They do not realize how pandemic affects essential workers needs; booking.com refuse to waive resort fee during COVID 19 when all the resort facilities are closed is a bad business tactic. They do not realize how pandemic affects essential workers needs
5 stars: Excellent	Sent a request on june 3 11pm about the not cancellable booking that we have made and ask to cancel it due to unavoidable circumstances. Woke up this morning june 4 and got the reply all ready and the refund was immediately on our account. Thumbs thumbs up for the very quick respond.; Sent a request on june 3 11pm about the not cancellable booking that we have made and ask to cancel it due to una…
1 star: Bad	FRAUDE!! BETRUG!! ESTAFA!! STAY AWAY FROM THIS PROPERTY ORLANDO PALACE APARTMANTS / FLORENCE APARTMENTS in FLORENCE. THEY HAVE CHARGED ME 3 TIMES BUT I ONLY RECEIVED ONE REFUND AFTER MONTH OF BATTLE BUT BOOKING.COM IS NOT HELPING EITHER. A NIGHTMARE SINCE JANUARY – WRITING THIS IN JUNE. BOOKING.COM DOES NOT REPLY TO MAILS AND VIA TELEPHONE THE AUTOMATIC SYSTEM SAYS THAT THE BOOKING CONFIRMATION N…
1 star: Bad	I will never book with booking.com again. Due to covid 19 had to cancel apartment in Poland. Ryanair cancelled my flights and I had no way of getting there. Customer service team agreed that I should get a refund but the owner of the property disagreed. It’s obviously not my fault I couldn’t get there, so I think it’s very unfair to just get my money and leave me with nothing. Not even a voucher.…
1 star: Bad	I will NEVER book with Booking.com again. We had 2 room only bookings prior Covid- 19. After 9 calls and emails back and forth asking for my refund I was told this would be refunded within 7-10 days . It’s now June . Today I spoke with a booking and an operator called me from Thailand so I’m hoping that didn’t cost me either. I will never use their services again.. Following Governments advice we…
1 star: Bad	Awful customer service, at first stated a refund would be given on a hotel due to covid then reversed this decision giving generic responses to all enquiries. Seeking a refund via credit card company at present. Will never use this company again; Awful customer service, at first stated a refund would be given on a hotel due to covid then reversed this decision giving generic responses to all enqu…
1 star: Bad	One star is to high for these thefts,I booked a hotel in Edinburgh as we were invited to the Royal Garden Party Due to the current situation the hotel is closed , I tried to claim my £426 back from the hotel only to be told they haven’t been paid , To date Booking ,com have not answered my E MAIL,; One star is to high for these thefts,I booked a hotel in Edinburgh as we were invited to the Royal …
1 star: Bad	During a global pandemic which has forced the cancellation of holidays the world over, booking.com refuse to give refunds. This is shameful. Truly disgusting. Let's hope they suffer and reap what they sow because of this.; During a global pandemic which has forced the cancellation of holidays the world over, booking.com refuse to give refunds. This is shameful. Truly disgusting. Let's hope they s…
1 star: Bad	I was told my room had been cancelled and that I would receive a refund. I waited 5 days and still no refund. When I emailed customer support they said my room had never been cancelled and they couldn’t explain the message I received ON THEIR WEBSITE! I’m now out $800 for a room I never got to stay in and they say they can’t do anything about it.; I was told my room had been cancelled and that I …
1 star: Bad	Booking.com is no more than a an organized theft ring I tried to book a room for 2 a.m. in the morning because my sister had died on the 23rd of may I try to book a room and they took my money I got no room and I got no refund booking.com or a bunch of scumbags and I wouldn't recommend them to no one when you spend a hundred $200 for a room you don't use the room and you can't get your money back…
1 star: Bad	Booking.com. Are totally RUBBISH Lost a small a fortune during this Covid19 period. Booking.com takes an age to reply,do not answer the question that I asked,they have been totally useless throughout. WHERE ARE MY REFUNDS BOOKING.COM Karma is a wonderful thing,remember people do not use these companies that refuse refunds etc,when we finally reach better times.; Booking.com. Are totally RUBBISH; …
1 star: Bad	Be aware! Booking.com is fraudulent. The hotel cancelled my booking and asked booking.com to refund the money. Booking.com refused. They have not paid the hotel. They have stolen my money. Do not use!; Be aware! Booking.com is fraudulent. The hotel cancelled my booking and asked booking.com to refund the money. Booking.com refused. They have not paid the hotel. They have stolen my money. Do not u…
1 star: Bad	PLEASE BE AWARE OF USING BOOKING.COM , I filed a fraud case for double charge by the Accommodation a couple of weeks ago and all I get is false information and promises that never happen. I spend hours on the phone and still no resolution. My card details was vandalised by the hotel and yet Booking.com is doing nothing about it. So do ur self a favour avoid them coz I will never ever use them aga…
1 star: Bad	My flight was cancelled hotel said they would honour the booking and move it to next year. Booking.com refused to amend the booking now found out they haven’t even paid the hotel !!! So they have my money and refuse to amend the booking absolute disgrace never book with these thieves again; My flight was cancelled hotel said they would honour the booking and move it to next year. Booking.com refu…
1 star: Bad	Disappointed and annoyed! I have used Booking.com for years and the experience was great until the year 2020.I booked an apartment in Malaga in January for the end of March 2020 and it clearly stated that I chose the free Cancelation option. The full amount was deducted on 31 January but thought it was a holding deposit. I cancelled the booking before the 14 days but I did not get a refund. I e-m…
1 star: Bad	Unethical company, after years of using them, they were not helpful at all with my bookings during Covid-19, will never use again. Hopefully they will not be around once this is all over.; Unethical company, after years of using them, they were not helpful at all with my bookings during Covid-19, will never use again. Hopefully they will not be around once this is all over.
1 star: Bad	Travel was cancelled on me due to countrywide lockdowns and none of my hotel bookings were refunded. I am now out over $800 and will never use booking.com again. Hotels.com however immediately refunded me the $300 I booked with them and will be getting more of my business in the future.; Travel was cancelled on me due to countrywide lockdowns and none of my hotel bookings were refunded. I am now …
1 star: Bad	Furious with Booking.Com for refusing to refund money after attempting to cancel a hen weekend which now can’t go ahead because the wedding has had to be cancelled due to Covid 19. These are not normal circumstances! We’ve had no option but to cancel. You are being TOTAlLY UNREASONABLE & UNHELPFUL by not answering calls or emails. You are keeping £643 of my money. That’s a large amount that could…
1 star: Bad	There isn't a no star option unfortunately. Do not touch this company! The way they have treated us over a booking is absolutely disgusting. I was basically told the Corona virus is 'my circumstance' and there is nothing they can do to help me get a £500 refund for hotel payment. The fact that the hotel is refusing to cancel all its bookings is unethical and so apparently means they don't have to…
1 star: Bad	I would not give even a half star for the dreadful and unhelpful service with our booking in Hannover. We have been trying everything change dates, refund, vouchers due to corona virus and no help came from booking.com, they just washed their hands, took our money for hotel booking and that was it. Untrustworthy, unhelpful and will not recommend and will not use again.; I would not give even a ha…
1 star: Bad	Beware booking accommodation via Booking.com during the current pandemic. They are not checking if property owners are accepting bookings such that they will take your booking only for them to cancel it on the day of arrival and you are left miles from home with no accommodation. Booking.com blame the accommodation owners who in turn say that Booking.com were told that they were not accepting boo…
5 stars: Excellent	I have to say booking.com has perfectly attended and solved all my requests/cancellations due to the Covid-19 crisis. Despite being overloeaded, they managed to answer all my phone calls and politely help me with my bookings, specially with those where I had no free cancellation. So, big thanks to the guys answering to people's requests and to the platform for being so responsive in such difficul…
1 star: Bad	I made a booking for Neoresid Residence Phoceennne in Marseile France early February for 28 May-3 June 2020, which I understood to be paid in advance and non-refundable. This was long before Coronavirus became an issue in the UK, and I was certain that I was going to be able to go. The money was taken on the 12 February from my Credit Cad account. But then in view of the lockdown in the UK, and m…
1 star: Bad	unbelievable treatment from booking.com we can not fly to our destination our flight have been canceled, We booked with booking.com thinking we would have good service HOW WRONG COULD WE BE!!!!!! even if we could get there we will need to self isolate for two weeks most of the duration of our holiday!!!! but they will not help us get our money back through, And you would think under these extreme…
1 star: Bad	Will never ever use booking.com again. Rude and no help atall. Quick enough to take your money but no help in getting it back.; Will never ever use booking.com again. Rude and no help atall. Quick enough to take your money but no help in getting it back.
1 star: Bad	Booked a hotel that met the basic and simple criteria for a $50 rebate once the stay was completed. Nice enough. Want to get the rebate? Good luck. First, you can't call in and talk to ANYONE that works at booking.com unlike, say, hotels.com. Everything is e-mails with offshore from the US who struggle with basic customer service and meeting those expectations. In short, it took hours upon hours …
1 star: Bad	I booked a holiday with Boutique Hotel B51, Marbella, with booking.com, for my husband’s birthday to visit April this year. However, due to the circumstances of not being able to travel during Covid-19 lockdown, we were unable to take our trip to Marbella. I contacted the hotel, who advised we would not be able to visit their hotel - understandably so. I then requested to book this hotel for the …
1 star: Bad	Booking.com have been less than helpful in the pandemic. They will not refund my hotel despite Greece being closed to tourism. Other tour operators seem more helpful. Shame as I have used booking.com but will not use them after this.; Booking.com have been less than helpful in the pandemic. They will not refund my hotel despite Greece being closed to tourism.; Other tour operators seem more helpf…
1 star: Bad	DO NOT USE BOOKING.COM! We tried to cancel our one night apartment rental after the pandemic closed everything. The concert we were going to was cancelled. They said too bad, we have to pay. They refuse to issue a refund. I will never use them again and will make sure no one in my very large family does, either.; DO NOT USE BOOKING.COM! We tried to cancel our one night apartment rental after the …
5 stars: Excellent	we had our holiday cancelled due to covid 19. Got in touch with booking.com that day for a refund for our villa. The company contacted the agent responsible for our villa and we go a refund that day. Great result. Thank you will defo use this company again.; we had our holiday cancelled due to covid 19. Got in touch with booking.com that day for a refund for our villa. The company contacted the a…
1 star: Bad	This hotel was filthy and full of drug users and homeless people. I had to ask to have my room changed 3 times due to noise, people smoking (cigarettes & drugs) in the hallway, and in the 2nd room they moved me to the tv screen was broken. The manager came to the room to look at it & said ‘people come in here and smoke drugs then break the tv’s’!!! By this time it was after 9 pm and I was not goi…
1 star: Bad	I booked a hotel in Bath through Booking.com in February for arrival on 4th June and They are advising me that the hotel is open and it is ok for me to stay in the hotel. I thought government guidelines were that hotels shouldn’t be open and we shouldn’t be travelling or staying away from home. We are elderly and also we were looking forward to visiting Bath and seeking the local tourist attracti…
1 star: Bad	Just wanted to share how booking.com treat key workers (NHS doctor) in the COVID-19 pandemic. I cancelled a reservation almost 4 months ago due to the pandemic The hotel agreed to a full refund and advised me booking.com are processing it. I have been back in touch with both the hotel and booking.com countless times over this period of time, each time exercising plenty of patience. In summary, th…
1 star: Bad	Hi We are far from totally satisfied as you are asking! We booked a holiday that we were really looking forward to in Greece and had planned to go to Spain the following year. Through no fault of our own ‘Easy Jet’ cancelled the flight out there, so to try and be as fair to all concerned, we notified yourselves and said we would reluctantly have to cancel our stay. We were then told that we would…
1 star: Bad	Intransigence of the highest order. Hotel booked through Booking.com refused to refund against terms and conditions of site. Approached Booking.com to refund on their behalf, but because hotel had not charged Credit Card in local currency, Booking.com have refused to refund until bank confirms GBP charge. Statement and online bank statements clearly show currency paid. Booking.Com very unhelpful …
1 star: Bad	I have booked a few thing through booking. Com which have been OK. Two days ago I tried to book apartments £542.09 no debit card or credit card fees. The amount of £542.09 was authorised but no confirmation of the booking. I emailed booking. Com through the customer service email us service. Which is a waste of time. However I was advised that they had no record of my booking and sometimes bookin…
1 star: Bad	What customer service? It is non existant! Like a lot of others we too have been unable to travel due to Government restrictions and have had zero help from what is laughingly called their "Customer Help Service". One hotel just responds with "If you have any questions please ask" continuously. Booking.com do not help and just said we have to wait for the hotel to respond! Then the help centre ju…
1 star: Bad	Unbelievably, used Booking.com for years, but as soon as COVID19 cancelled flights and introduced restrictions, I was unable to go. Booking.com would not refund my money or answer my messages. DO NOT USE BOOKING.COM, they have lost my & my friends and family business. I am now going through the Omnibus to try can get them to sort them out.; Unbelievably, used Booking.com for years, but as soon as…
1 star: Bad	Don't ever use Booking.com. I made hotel bookings with Airbnb, Hotels.com and Booking.com before the covid pandemic. ALL BUT booking.com refunded all my bookings. Booking.com would not even help and asked me to contact the hotel directly. Would NEVER EVER use booking.com.; Don't ever use Booking.com. I made hotel bookings with Airbnb, Hotels.com and Booking.com before the covid pandemic. ALL BUT …
1 star: Bad	Awful customer service. Had to cancel due to covid-19 and nonrefundable as paid to hotel. That say calling hotel and then come back to say no-one at the hotel speak English so can't help. Say that they will contact in 2 days. No response after 5 days. Will never use again.; Awful customer service. Had to cancel due to covid-19 and nonrefundable as paid to hotel. That say calling hotel and then co…
1 star: Bad	Rip off merchants. Not worth a light. Will NEVER use again.; Rip off merchants. Not worth a light. Will NEVER use again.
1 star: Bad	They are trash they let my stolen card be use and I reach to they customer service they still didnt care; They are trash they let my stolen card be use and I reach to they customer service they still didnt care
1 star: Bad	We booked Webase hostel in Fukuoka before Covid 19 pandemic. And Japan restrict travel which mean we can't enter Japan as tourist. Requested a refund from booking.com and they replied that the establishment refused. So we contacted Webase directly and they are more than glad to offer the refund due to the pandemic. We contacted booking.com again and they are looking into for 3 months already. So …
1 star: Bad	Booking are scammer and faker and everything in thier website is not real.; Booking are scammer and faker and everything in thier website is not real.
1 star: Bad	Shixty service experianced don waste your time on booking.com; Shixty service experianced don waste your time on booking.com
5 stars: Excellent	Like many our pre-paId, non refundable hotel booking (in Italy, mid May) could not be completed. At first things did not look good with booking.com but a little perseverence brought forth a full refund. Will therefore continue to use them with reasonable confidence. Now if only Secret Escapes was so easy...; Like many our pre-paId, non refundable hotel booking (in Italy, mid May) could not be com…
1 star: Bad	They charged me double the price that the hotel did and when I complained about them and the hotel, they believed the hotel and not me and did not refund me. The hotel they recommended was horrible too!; They charged me double the price that the hotel did and when I complained about them and the hotel, they believed the hotel and not me and did not refund me. The hotel they recommended was horrib…
1 star: Bad	Booked an hotel in December for a holiday mid August. I contacted booking.com to change the holiday to next year. Booking.com tried to get hold of hotel, failed and asked me to do their work for them. The hotel are refusing to move the dates and I have to pay the full amount by the 15th of June or lose the holiday. I'm now looking at losing the £1000 deposit even though anyone entering the countr…
4 stars: Great	COVID 19 travel information hard to find but I found it and was finally after weeks of trying I was able to get a refund. Booking.com calls if Forced Circumstances or Force Majeure look under partner.booking.com en-gb/help/legal-security/important-information-regarding-coronavirus or you can go to booking.com and go to the partner page under COVID 19 and find it there. 1. Conditions of Force Maje…
1 star: Bad	I recently had a bad experience with one reservation made via Booking. The place was very dodgy, property owners not answering their phones and lack of information about the location. Upon cancelling of course they had a no-refundable policy which obviously was highlighted after the process. Booking company didn't do anything about it and they really need to verify their clients. This is the last…
1 star: Bad	I have booked a room in Alicante (Spain) at end of june.My flight was cancelled if i could go I would not because the Spain goverment wouldn' not allow it.I contacted them several times about my situations i have changed with them so many emalis without success i wanted to change the dates but they were not able to help niether to cancel for free because my reservation was clasified as "non refun…
1 star: Bad	My accommodation & flight was cancelled due to the current COVID-19 pandemic. As you can appreciate not by me, but our respective countries. After some empty "lip service" emails from booking.com "customer services" they are refusing to refund me the cost of the accommodation because, get this, I didnt turn up !!! It's notthe end of the matter I can assure you but I for one, will be advising ALL …
Elsa Jane Tait; 1 star: Bad	I have recently felt very let down by Booking.com And Moxy due to my holiday being cancelled from Covid-19 like many others. Back in December last year and early January, my boyfriend and I booked a holiday to Dublin for a few concerts and booked a hotel. At the time we clicked on the button to be able to get a refund incase of an emergency. We aren’t used to travelling and we will learn from our…
1 star: Bad	Only given it 1 star as can't give it zero. Disgusting customer service at a time of uncertainty and stress. Unable to travel and stay in our booked (& paid for) accommodation in Scotland because of the COVID-19 lockdown. Only reason we did not go was because it was not LEGAL to go. Booking.com however do not consider this a viable reason for our 'no show' so have point blank refused to reimburse…
1 star: Bad	Bad service. Overpriced. Unfair guest reviews, unfair hotel ratings. Overpriced because of the abusive comissions charged from the hotels. Up to 25-30% of comission rate? Necer book using Booking.com, go straight to the hotel webpage, you will get better rates and better service; Bad service. Overpriced. Unfair guest reviews, unfair hotel ratings. Overpriced because of the abusive comissions char…
1 star: Bad	I really cant advise anyone enough DO NOT book anything through Booking.com. They are taking advantage of Covid19 ... A DESPICABLE COMPANY !!! I booked a family villa last year (paid in full £3,500) for my dream wedding in June 20, due to Covid19 my wedding has been cancelled and all flights etc. On trying to obtain my refund through numerous calls and emails, they have refused to refund as my bo…
1 star: Bad	I made an enquiry regarding a booking I wanted to make I needed to know about cancellation policy should my flight be cancelled with regards covid 19. I made this enquiry 26th May 2020 by email and by 27th May 2020 booking dot com have increased the price of my enquiry by £1100...in fact all my recent searches have been increased...booking.com obviously not happy at having to deal with my enquiry…
5 stars: Excellent	Use them for manys years, never had any problems. Always book free to cancel hotels, even though I normally prepay to minimise large cash exchange. Had booked 2 trips overseas this year and had to cancel due to Covid19. All bookings, hotels and taxis, were refunded in less then a week.; Use them for manys years, never had any problems. Always book free to cancel hotels, even though I normally pre…
1 star: Bad	Used booking.com many times. During Covid 19 very unhelpful. Paid £1275 last October for hotel. Advised us we had lost our money as non refundable booking and the money was paid direct to hotel. Explained we could not travel to France as flight cancelled and hotel was closed. Nothing. Contacted hotel who also advised no refund. After discussions directly with hotel we received a voucher. Not sure…
4 stars: Great	Very good company, I have used them many times to book my holidays to Dubai and Kenya, always good deals and friendly staff, very good prices aswell. I am now a genius member with them.; Very good company, I have used them many times to book my holidays to Dubai and Kenya, always good deals and friendly staff, very good prices aswell. I am now a genius member with them.
1 star: Bad	Distgusting company. Unsympathetic and unhelpful - inflexible and unwilling to help in COVID19 or any time of need. They don't refund when other companies would agree that its the right thing to do, their chat system never works properly, they won't ever get another booking from me or anyone i advise of our experience due to having lost $900 that could STILL be refunded when its obvious the reser…
1 star: Bad	I have had so much negative history with booking.com that i never use them again. Hopefully you guys going bankrupt during this pandemic.. The new online booking site called Travala.com have way cheaper prices and an excellent customer support! They have refunded my money during covid19 even thought my booking was not refundable.; I have had so much negative history with booking.com that i never …
4 stars: Great	Booked a hotel right before departure. Very comfortable room chosen.; Booked a hotel right before departure. Very comfortable room chosen.
1 star: Bad	I have booked three accommodations through booking.com. The most recent, I was informed I could change dates due to CV. So I did took a few weeks, all confirmed by accomodation so I changed flights. Then an email stating my accomodation was cancelled. No response from Booki g.com after almost one week of messages. Accomodation informed.me, Booking.com cancelled after not receiving payment. The ac…
1 star: Bad	Have been using booking since the very beginning... and I agree with the raters that if all goes to plan, the service is excellent. BUT, and it happened to me twice in all these years... If the hotel cancels your booking (so not you)(one time for an unspecified reason, another one recently the hotel closed due COVID19), and they refuse to give back the money, Booking.com washed its hands in innoc…
1 star: Bad	Shocking service still trying to get money back from a hotel I cancelled with tem and the hotel having to get legal advice. Should not have to come to this. Hotel was not going to be open due to lockdown yet they are keeping £123.50 I paid both hotel and booking.com passing book to each other gave contacted many times just getting same replies after several weeks. Be very aware before paying any …
5 stars: Excellent	Excellent customer service Would always use this company,so reiable; Excellent customer service Would always use this company,so reiable
1 star: Bad	So my refund saga continues. Bookings.com agreed two weeks ago to give a refund after the hotel I booked could not open. Now however they want copies of my credit statement from 7 months ago when I paid. I paid on their site so they already have proof of payment. It will take weeks for me to get these from the bank and lots more trouble for me. JUST AN EXCUSE FROM BOOKINGS as they try everything …
1 star: Bad	Never again. Drove 4 hours away with my kids to the beach and when I got to the reserved hotel... booking.com messed up. I drove 4 course back Home on Memorial Day weekend. There were not a single hotel with a vacancy; Never again. Drove 4 hours away with my kids to the beach and when I got to the reserved hotel... booking.com messed up. I drove 4 course back; Home on Memorial Day weekend. There …
1 star: Bad	Wouldn't even rate 1 star right now as it is not deserved. I was told by booking.com I would receive a refund within 30 days for my booking in Venice for May which was cancelled due to Covid19 but they have now told me I have a voucher for up until April 2021. I declined the voucher to which they agreed to refund me! Why have they retracted this? So they have lied about a refund. I hope they rect…
1 star: Bad	I booked 3 nights at a hotel in Spain, paying $ 400. Because of Covid 19, it looks like we can't go, I called the hotel. They refused to return or rebook. The site writes that a refund is not possible.; I booked 3 nights at a hotel in Spain, paying $ 400. Because of Covid 19, it looks like we can't go, I called the hotel. They refused to return or rebook. The site writes that a refund is not poss…
5 stars: Excellent	Excellent service, I was able to cancel my transaction without any problems. I talked to one of their staff and assisted me in my refund. Thank you!; Excellent service, I was able to cancel my transaction without any problems. I talked to one of their staff and assisted me in my refund. Thank you!
1 star: Bad	While I’m not a customer or Booking.com, I do live next to an apartment that is booked through them. It’s a 1 bed apartment that last night had 9 people having a party in the middle of a global pandemic. The party ended up in the hall, as the the drugs, the vomit and the toilet apparently... While I do appreciate the owner is the person responsible and booking.com said ‘we don’t manage the proper…
1 star: Bad	no reply to emails, took £167 for no reason, used them for years will never ever use a again, disgusting thieves. say goodbye to your business next year. not even the courtesy of a reply.; no reply to emails, took £167 for no reason, used them for years will never ever use a again, disgusting thieves. say goodbye to your business next year. not even the courtesy of a reply.
5 stars: Excellent	I was able to quickly cancel my accommodation very quickly. More importantly, customer service was super quick and helpful.; I was able to quickly cancel my accommodation very quickly. More importantly, customer service was super quick and helpful.
1 star: Bad	We are still in lockdown, flights have been cancelled and our air BnB villa are refusing to refund our money for our stay as they are still open (we are in the UK, meant to be going to Croatia). No empathy or alternatives given by either the villa or booking.com, who’s response is just talk to the villa! as we were a big group going, we have now lost a substantial amount of money. Ridiculous!; We…
1 star: Bad	I booked and paid for 4 nights accommodation advertised through booking.com, for some of my work colleagues. When they turned up at the property they were initially refused entry as the property didn't know that the accommodation had been paid for - apparently they had a communication issue with Booking.com. When my staff entered the accommodation they found it to be filthy, medical waste in the …
1 star: Bad	It's time the government stepped in to protect people against scum like this! Booking.com took my reservation and my money when all the time they were fully aware the hotel in question was closed due to covid 19. I was telephoned,less than twenty four hours before my reservation was due to start,and told by the manageress that the hotel was completely closed. After complaining to booking.com I re…
1 star: Bad	Booking.com are thieves with absolutely no care or loyalty to their customers. I would never use use this company again and would be advise others to stay well clear; Booking.com are thieves with absolutely no care or loyalty to their customers.; I would never use use this company again and would be advise others to stay well clear
1 star: Bad	There is nothing friendly in Friendly Rentals. My experience with them is extremely negative. Due to Madrid lock down my family trip had to be cancelled. Since our prepayment was nonrefundable, we initiated correspondence with booking and FR almost a month before due date, but their responses were late and with no solution. Nonrefundable service is to protect FR in case customer is canceling but,…
1 star: Bad	We found a hotel in North Italy that wanted payment in full - this was booked at the beginning in February for a holiday 12th to 22 June 20 and we went ahead and booked as we have never before had to cancel or move a holiday. Then Covid struck. A couple of weeks ago I went through Booking.com and asked if we could move the booking to June 2021 - but be refunded 90% of the value of the booking whi…
5 stars: Excellent	Just to say I have had a positive experience with booking.com over cancelling 3 hotels we had set up for our Norway holiday next month. One of these had a "cancel for free" option, this was hassle free.. The other ones, we had paid up-front for the cheap confirmed booking with no cancellation, and the hotels were still open in Norway - just no way for us to get to them. Contacting the hotels dire…
1 star: Bad	Booking.com has been asking me to go in circles by buying time week after week and routing any emails to property who doesn't have reply. They've taken my money and refusing to return it back. Never book booking.com, they should be given 0 trust rating.; Booking.com has been asking me to go in circles by buying time week after week and routing any emails to property who doesn't have reply.; They'…
5 stars: Excellent	I had booked a flight with Jet2 to Corfu on 2nd June and booked two lots of accommodation Fays Luxury Sea View Rooms and Hotel Akrotiri. Both accommodations were on a non refundable basis. They both kindly agreed to a full refund given the current situation but Fays Luxury Sea View Rooms were a little more difficult to contact so Booking.com managed to contact them directly on my behalf. I receiv…
1 star: Bad	Like many others Booking.com refused to refund me due to Covid19. They try to bounce me back to the hotel but the contract is with Booking. com. Read the following carefully : If your hotel is cancelled and booking. com do not refund they are in breach of contract. Contact your credit card company and bank. They will dispute the charge. They are bigger than Booking. Com. If not you will get bounc…
1 star: Bad	Do not use this company! Absolutely shocking how they are able to rip off so many people during the covid 19 pandemic... how they can take your money with zero refund when you have paid for a service you wont be recieving is disgraceful... will never use again!!!; Do not use this company! Absolutely shocking how they are able to rip off so many people during the covid 19 pandemic... how they can …
1 star: Bad	If I could select - stars I bloody would!!!! Absolute joke of a company to book through. Stayed in a caravan, there were issues and we had to leave early so contacted the people who we stayed with and they said yes we will get a refund. So we had to go through Booking.com and they said yes fine it will be back into your account in 3-5 working days.... got the refund and a month later they have ta…
5 stars: Excellent	Use booking.com mainly. PErfect for me i combionation with AirBnB; Use booking.com mainly.; PErfect for me i combionation with AirBnB
1 star: Bad	Very poor customer service. Site clearly states you can have a reward payment after your stay yet then doesn't pay the reward. Been over 3 months since the stay and 2 months since I should of received the reward payment. Won't use this site again, not helpful in solving the issue, just keeps passing the buck.; Very poor customer service. Site clearly states you can have a reward payment after you…
1 star: Bad	Never book with booking.com, their customer service is the worst I have ever experienced. Having booked a 5* hotel for my New Year’s Eve with my wife, we turn up to find the hotel has been lowered to a 4* and changed ownership, meaning I ended up paying 5* price for a 4* (and to be honest worst than this) stay. They then proceeded to take 6 months of me chasing to get any answer from their custom…
1 star: Bad	They have taken advantage of covid 19. They said our holiday was unable to go ahead (our flights were also cancelled) but said we could only get vouchers for the specific property booked. Boarders in croatia were closed at the time, and hotels were only open to residents so we were unable to check in even if we went. They ignored emails and refused to accept or respond to a complaint. Had to get …
1 star: Bad	I own a hostel and a guest who booked through booking.com was drunk pretty much every night he stayed. One of those nights he made a huge problem saying that we (the hostel) took his suitcase. It was in the middle of the night, when the rest of the guests where sleeping. He was extremely loud so we had to call the police. Then we showed him and the police the security cameras footage showing that…
1 star: Bad	OK so had to cancel due to corvid 19 explained reasons ie airline had cancelled all flts till 17th June. We were due to fly 31st May returning on 14th June. Tried free cancellation which was an option on their Web site. Er no we would be charged a cancellation fee. In good faith I had paid in full, I did receive a refund less the fee,and told to reclaim on our insurance. As there is an excess on …
1 star: Bad	One star too many. Wish I could leave less. Zero customer service being offered from Booking.com. Covid-19 is bring the best and worst out of companies.; One star too many. Wish I could leave less.; Zero customer service being offered from Booking.com.; Covid-19 is bring the best and worst out of companies.
1 star: Bad	I booked Bali Ginger suites through booking.com. Due to coronavirus this could no longer go ahead. I tried through booking.com to get a refund but all they did was pass me backwards and forwards to the hotel to deal directly with them. I had to reluctantly accept a refund minus 10% fee from the hotel and booking.com were no help whatsoever and have refused to refund me the full amount which I was…
1 star: Bad	I have used Booking,com 20-30 times over the last few years and never had an issue.... but for all those booking nothing went wrong. Our honeymoon was booked for Italy at the start of June this year, obviously due to the Covid 19 outbreak both have been cancelled. Our flights have been cancelled, our property not through booking.com sent us a full refund about 25 minutes after I contacted them. B…
1 star: Bad	No refund after FREE cancellation. We cancelled more than two months ago a holiday with FREE cancellation policy which was fully charged at the moment of reservation. Booking.com confirms we are entitled to refund, but they simply do not refund us! They keep kicking the can down the road, everty time requesting us to wait "two more weeks". We have lost HOURS on the phone, each time re-explaning t…
2 stars: Poor	I am both a booking.com partner and have used them for all our holidays these past years, both in Europe and Africa, so understand both sides!! Yes the CS advisors are courteous and do their best, but booking.com has NO INTEREST in getting refunds for customers at this present time. We had a 4 night hotel reservation booked and paid for in London for last week and neither the property nor Booking…
1 star: Bad	I have used booking.com in the past, and more recently (March 2020), I made a reservation at a property in Napoli, Italy. Of course, due to the Coronavirus outbreak, I couldn't travel and reached out to booking.com in a timely manner for a refund. I was assured a "best possible solution"- The whole country went on a lockdown, and yet the property expects me to pay in full for the reservation whil…
5 stars: Excellent	I can understand some of the negative reviews seen all the stress and uncertainty we all are living through. But I must say that I have had a very positive experience myself with booking.com. Our holiday to Sri Lanka was canceled last most because the Sri Lankan government suspended all arriving flights from the UK. It did take some perseverance to get through to customer service, to be expected,…
1 star: Bad	I used booking.com to book 3 properties as I traveled from Minnesota to California. Just know that if you have a concern about a reservation made via booking.com: 1 - What is advertised (RE: non-smoking, breakfast, etc.) is not what you may end up receiving. 2 - It is nearly impossible to get a refund if a property does not deliver as advertised. I personally will never use booking.com again; the…
1 star: Bad	Booking.com has forgotten their customers in the Corona crisis. They are too busy planning the next dividend payment and how soon they can raise their executive salaries. It was a good gig while it lasted. Now I hope all the customers will do the right thing and move on. These guys do not deserve to be in business. I've booked more than 30 trips with them over the last 5 years but never again.; B…
1 star: Bad	I WILL NEVER USE BOOKING.COM AGAIN!!! Due to Corona virus we HAD to cancel- they refused to give us our deposit back! After endless emails and much frustration- we are out of our $$. Shame on you!; I WILL NEVER USE BOOKING.COM AGAIN!!!; Due to Corona virus we HAD to cancel- they refused to give us our deposit back! After endless emails and much frustration- we are out of our $$.; Shame on you!
1 star: Bad	Wow... Extremely disappointing service from booking.com. I am awaiting my refund for my hotel booking which was booked through booking.com!!! We had planned to go to a wedding in Portugal which was cancelled due to Covid-19. I have sent numerous emails and made plenty of calls and initially I was told that they will come back to me as soon as possible with a follow up, then I never heard back fro…
5 stars: Excellent	Fantastic service let down by Sykes and booking.com have refunded the full amount. Always really helpful have used them many times and will continue to do so ????; Fantastic service let down by Sykes and booking.com have refunded the full amount.; Always really helpful have used them many times and will continue to do so ????
1 star: Bad	Still waiting for refund despite receiving this email 53 days ago promising to pay within 14 days. Terrible service no answer on the phone. no communication. Does the hotel close already? Booking.com are now ignoring my emails and seem to have washed their hands of my case. terrible service. avoid at all costs! Greeting from Swissôtel Suites Phuket Kamala Beach! After management discussed, we are…
1 star: Bad	I will never book through booking.com or priceline.com (Booking.com handles pricelines' customer service) again. My hotel room was just a king bed, when I reserved I paid extra for a sofa bed also. Instead of refunding the difference, blame was placed on me for not notifying the hotel immediatly. I had drove all night, checked in @ 9am went to the 3rd floor & unloaded all my stuff before I notice…
1 star: Bad	Appalling customer service helpline - especially during this covid time. No advice at all - tells you to cancel (even on a refundable hotel booking) to what end ?? Just to give your money away? Will never use again. Beware your hard earned cash!; Appalling customer service helpline - especially during this covid time. No advice at all - tells you to cancel (even on a refundable hotel booking) to …
1 star: Bad	I am so extremely disappointed with booking.com. No communication, no service. They ask for more than USD 1660 to cancel due to Corona. We are not allowed to cancel for a lower fee or at all. We have learned our lesson. We will never ever again go to Booking.com. In tears, losing our hard earned money for something that is not even our fault.; I am so extremely disappointed with booking.com. No c…
1 star: Bad	Booking.com are a bunch of. Cowboys, I would. Not use them again. Due to the current situation (which is not special according to them). They will not. Refund my money. For a booking to Rome. There customer service dept promised to treat this as a special case but when it came to it, they refused. A refund. Avoid using them at all costs!!; Booking.com are a bunch of. Cowboys, I would. Not use the…
4 stars: Great	It is really easy to book your hotel reservations and also they were able to help cancel my reservations with ease due to the pandemic. Their costumer service was able to respond to my inquiries really fast and was able to assist me of my concerns.; It is really easy to book your hotel reservations and also they were able to help cancel my reservations with ease due to the pandemic. Their costume…
1 star: Bad	Had a 18 day trip to France, Italy and Swiss in May'20. Booking.com was so unprofessional and unreliable. They completely washed their hands off from all our cancellations and put us on the mercy of the hotels. I had to speak to each of the 7 hotels for cancellations and whoever agreed was our luck and at a few hotels, we lost our full money. But booking.com didn't help us at all. They may give c…
1 star: Bad	A sham wont give any help not offering a refund due to cv19 and no ferries also wont revise dates for next year..very poor service.; A sham wont give any help not offering a refund due to cv19 and no ferries also wont revise dates for next year..very poor service.
1 star: Bad	Refusing to give refunds. We are not allowed to travel due to a travel ban which is in place for our booking in less than 2 weeks time. Booking .com and the accommodation are refusing to give a refund claiming that the accommodation is open for business. They are ignoring any questions around the fact it would be illegal for us to go there. Meanwhile Airbnb are giving full refunds for bookings wi…
1 star: Bad	The worst experience with them happened in Italy. Some one used my card and I never got refund. Customer care pathetic.; The worst experience with them happened in Italy. Some one used my card and I never got refund. Customer care pathetic.
1 star: Bad	DO NOT TRUST THIS SITE! Due to covid we had to cancel our entire holiday and in March our country (NZ) went into full lockdown. So as we were cancelling for reasons outside of our control we asked if we could get a waiver of the cancellation fee or at least a reduction. Got the usual "we'll ask the property". The property of course said no so we took that on the chin and cancelled the booking ask…
1 star: Bad	We have been trying to retrieve our money after we were barred from entering our holiday destination due to coronavirus restrictions. We have been lead on for almost 2 months being told that they will get back to us when the hotel responds to the request. We still have not been able to get our money back. We have reported this company to the authorities for unethical behaviour.; We have been tryi…
5 stars: Excellent	Booking.com is the ONLY website & platform that had a no-stress, 100% money back return for my cancelled travels! Every other company I've dealt with is only issuing travel credits, so THANK YOU booking.com for being such an awesome company!; Booking.com is the ONLY website & platform that had a no-stress, 100% money back return for my cancelled travels! Every other company I've dealt with is onl…
5 stars: Excellent	Great customer service. They helped me with my several reservations due to Covid19; Great customer service. They helped me with my several reservations due to Covid19
5 stars: Excellent	I was so worried as my booking for a Porto hotel was £600 and non refundable. However booking.com and the hotel they used refunded the entire amount. Thank you very much for your help.; I was so worried as my booking for a Porto hotel was £600 and non refundable. However booking.com and the hotel they used refunded the entire amount. Thank you very much for your help.
1 star: Bad	These people are the biggest con artists on the net. Do not trust them one inch. Seriously beware. Mark; These people are the biggest con artists on the net.; Do not trust them one inch.; Seriously beware.; Mark
2 stars: Poor	I have used Booking.com for several years now and I have had no problems. However, since Covid-19 came into our lives I have been very disappointed by this company. I booked a hotel room in Wales but the hotel chain was shut due to the virus and will remain shut until July, my booking is for June, so naturally I asked for my money back since I cannot use the room. I contacted Booking.com and was …
1 star: Bad	Joke of a company. Have been trying for 6 weeks to get a refund from a hotel in Turkey. Bookings customer service constant answer is "we will get back to you when the hotel responds to the request" Now my check in date has passed i was listed as a no show and have been refused a refund. Bookings explanation...its the hotels decision, we can't do anything about it. Not sure what, if anything, they…
1 star: Bad	Booking.com is handling the Covid-19 situation extremely poorly. The assistants responding to questions and request put forward, do not provide proper answers. The accommodation I booked via Booking.com in France is not available for use in the dates I booked, because of French government confinement plan - I expect that the fee already paid can be waived back. The fact above constitutes a breach…
5 stars: Excellent	I hear about reviews and how they may not be genuine, but believe me, this is genuine. I booked two hotels in Venice before the covid-19 crisis. I hung on and hung on and kept the bookings. But it seems that my trip to Venice with my two granddaughters won't take place so I went onto Booking.com and requested a refund. As with a lot of other travel companies I expected some problems, delays becau…
1 star: Bad	We have tried and tried to even speak to someone from this outfit ,Not a chance. Spoke to the hotel they booked he was as useless as them. Have sent countless Emails NO RESPONSE., Credit card advised that as we used them as third party , for Booking.com to book the hotel they cannot do a charge back. And if you mislay the 4 digit code they allege to have sent you have no chance. We gave dates tim…
5 stars: Excellent	I had booked 2 hotels and a mini cab from airport in Thailand for May, also 2 B&B in Ireland for July. Due to Covid-19, my Bookings had to be cancelled, i received no quibble refunds within 4 days! Excellent service, especially in these troubled times. I think if your bookings are non-refundable it will be more difficult as the hotels don't want to give a refund even if Booking.com try. Probably …
1 star: Bad	Terrible service, just a money grabbing business! Taking advantage of a bad situation, won't refund money due to covid-19! Better of calling hotel directly and they will help a lot more.; Terrible service, just a money grabbing business! Taking advantage of a bad situation, won't refund money due to covid-19!; Better of calling hotel directly and they will help a lot more.
5 stars: Excellent	Unfortunately, due to Covid-19, my Booking in June had to be cancelled, received no quibble refund within 4 days! Excellent service, especially in these troubled times.; Unfortunately, due to Covid-19, my Booking in June had to be cancelled, received no quibble refund within 4 days! Excellent service, especially in these troubled times.
1 star: Bad	Booked a property in Lisbon For 11 May and contacted them to ask if we could change the dates To May 2021 due to pandemic and our flights being cancelled. They agreed to change the dates. Due to flights not being online yet we asked for more time. They agreed and contacted us several times for an update. When we gave them dates they just said they are still open and no flights is not their proble…
1 star: Bad	Absolutely disgusting company. I was booked and charged to go to Blackpool for the rebellion festival and booked to stay at the Kensington Hotel. Due to the Covid19 pandemic the rebellion festival has been cancelled. This was my sole purpose for going to Blackpool. I go every year. I emailed Kensington Hotel, Blackpool and booking. COM and explained that rebellion had been cancelled and the Scott…
1 star: Bad	Disgusting company. Refused to refund hotel bookings despite cancellation. No respond from customer service whatsoever Look elsewhere when booking your trip. I am submitting a complain to consumer ombudsman against booking.com; Disgusting company.; Refused to refund hotel bookings despite cancellation.; No respond from customer service whatsoever; Look elsewhere when booking your trip.; I am subm…
1 star: Bad	Who did I/you pay? Booking.com use our card details to pay hotel/accommodation/supplier direct when booking. Your payment will not go to Booking.com. Booking.com receive commission from our booking, direct from hotel/other. (The supplier) Is our contract between Booking.com or the supplier? Read Booking.com T&C. (Suppiler?) CHECK YOUR DEBIT/CREDIT CARD to see where your payment has gone. (Anywher…
1 star: Bad	Absolutely shocking company. Refused to provide a refund for a trip that was cancelled due to COVID-19. I requested a chargeback through my card issuer and booking.com lie on their response stating that I have not tried to resolve the issue through them and therefore they are rejecting the chargeback. I contacted them multiple times! Taking this to the small claims court.; Absolutely shocking com…
1 star: Bad	Class action. We are a travel company who has been using Booking.com with our clients for years. We had a Covid cancellation and were reaching out get our booking changed. Booking.com refused to help and directed us to contact the property. The property would not respond. Booking continues to not respond and has removed our honest review of our interaction with the property. Booking.com is not a …
1 star: Bad	I had a reservation with Villa Sabai in Pattaya Thailand. We paid before as always we do, but them we got that pandemic and virus around all the world. We cant travel to anywhere unless we make a quarentine of 14 days. The hotel didnt accept the cancelation. We lost 500 EUROS. even we asked for even half of the price we paid. We tried a solution for both parts. But NOTHING. NEVER BOOK WITH THAT P…
5 stars: Excellent	Booked my trip to indonesia this year for our wedding. Because of CoVID-19 & reschedule from our wedding because of that, we couldn't go to Indonesia. After a couple of conversations with booking.com employees - the could contact the hotel for us & cancel free (we had no 'Free cancelation' because we thought nothing could happen -_- :D ). Thank you for the really good service booking! We will boo…
1 star: Bad	Really poor service - Stops our collaboration today Good advice, find a more serious provider who will take responsibility for their product. Very briefly. Had booked a hotel in Thailand. Images and reality were not the same. Really bad hotel. We took pictures of the hotel. I booked another hotel on booking.com. Later we were rejected on the grounds that the hotel told us that our pictures were n…
4 stars: Great	I booked one of my travels through their website and I was amazed how easy and fast the transaction. Good customer service they update me from time to time regarding my travels.; I booked one of my travels through their website and I was amazed how easy and fast the transaction. Good customer service they update me from time to time regarding my travels.
1 star: Bad	Gawd Damnit. I wish I could give them a negative number. Literally the worst company I have ever dealt with in my entire shucking life. Website is total dog shiznit. Customer service is a gawd damn mother phucking joke. This is the reason people do stoopid sh!t. You know, what Lester Holt reports on at 630 eastern time. Jesus MF Christ! How tf is this company still in operation?; Gawd Damnit. I w…
1 star: Bad	Final email from booking.com. Booking.com /cottage owners will not refund as you were a no show. How can I be a no show? I had a email from your self's stating the cottage had closed due to covid 19. Has anyone else had this excuse? What can I do?; Final email from booking.com. Booking.com /cottage owners will not refund as you were a no show. How can I be a no show? I had a email from your self'…
1 star: Bad	They show a price and charge other (bigger) on your credit card. That alone shows this company is not suitable.; They show a price and charge other (bigger) on your credit card. That alone shows this company is not suitable.
1 star: Bad	Booked to go Italy in May, flights were cancelled in March and I've been back and forth with them since, no replies at all from the hotels just booking.com telling me they've requested to waive fees and theyll be in touch... tearing my hair out will never use them again, shown their true colours! Only thing to do now is go through the chargeback scheme with my bank, you can do that with debit & c…
1 star: Bad	AWFUL AWFUL AWFUL THEY WILL NOT WORK WITH YOU, PRICES ARE NOT THAT GREAT AND REFUSE REFUNDS. SORRY I WENT WITH THEM NOW I AM STUCK.; AWFUL AWFUL AWFUL; THEY WILL NOT WORK WITH YOU, PRICES ARE NOT THAT GREAT AND REFUSE REFUNDS.; SORRY I WENT WITH THEM NOW I AM STUCK.
1 star: Bad	I Will never be using booking.com again. My flights have been cancelled Due COVID 19 and yet it is impossible to get my money back. During these testing times I thought they would be supportive of their customers when we need it most, obviously not.; I Will never be using booking.com again. My flights have been cancelled Due COVID 19 and yet it is impossible to get my money back. During these tes…
1 star: Bad	Absolutely shocking experience. No protection whatsoever in the current covid 19 situation. Flights cancelled and frankly impossible to get there but still not entitled to a refund even though it’s totally out of our control. This urgently needs sorting out. Will never be using Booking.com again.; Absolutely shocking experience. No protection whatsoever in the current covid 19 situation. Flights …
1 star: Bad	Booked a villa on booking . Com advised only half would be taken and free cancellation until 14 days before travel full Amount t taken and also changed cancellation policy cancelled booking sent every thing they needed for refund but no refund terrible customer service they are terrible when you speak to them they are basically saying we are lying what we paid even though they have our credit car…
2 stars: Poor	booking com has many hotels on offer and service has always been good... but at my last overnight stay in madrid I was left in the lurch... it's corona time and I didn't get any help from customer service.; booking com has many hotels on offer and service has always been good... but at my last overnight stay in madrid I was left in the lurch... it's corona time and I didn't get any help from cust…
1 star: Bad	The worst company to ever book with. Refuse to give a refund AFTER giving me a date I was to receive the refund, I have been advised they will not issue for 6 months! Customer service constantly coming back with information for a previous booking over a year ago despite being advised multiple times of the booking and all the information!! Refuse to give their complaints processes. Cant wait to ne…
1 star: Bad	Despite a ban to travel to Montenegro due to coronavirus, booking.com refuses to issue refunds. They postpone the cancellation in hope you breach 48 hour rule. It was the last time I used the service.; Despite a ban to travel to Montenegro due to coronavirus, booking.com refuses to issue refunds. They postpone the cancellation in hope you breach 48 hour rule. It was the last time I used the servi…
1 star: Bad	I booked a property via booking.com for the start of July for my elderly parents who live a 12hour+ plane journey away to stay in whilst attending my wedding. It was admittedly non refundable but who could have predicted a world pandemic causing the need to cancel? We are now sadly cancelling the wedding reception as we don’t see how it can happen in the foreseeable future. Alongside juggling my …
1 star: Bad	Absolutely diabolical customer service. Completely obsessed with shifting the onus onto the customer. Just be aware when you place a booking with Booking.com that, if something goes wrong, you'll have to deal directly with the hotel (who have no interest in helping you). I've spent 6+ hours on the phone with Booking.com. They even promised me a refund direct from them, only to change their minds …
5 stars: Excellent	I had a really good experience with booking.com during the covid19 crisis. When I tried to cancel the (various) hotels i had booked and the hotels were not responding I phoned the customer service lines, and although there was a bit of a wait, they phoned each hotel on my behalf and I had refunds within days for each hotel. Thank you.; I had a really good experience with booking.com during the co…
1 star: Bad	I had done cancellable booking in for February and cancelled in well in time. The refund should have been automatically processed. I had almost forgot about this booking and then when i was going through past transaction i realised that i haven’t got refund. When asked to support team, they asked me to check with the hotel directly after 15 days. I would have lost 400 bucks because of this.; I ha…
1 star: Bad	The worst experience I've ever had. I called them to get a refund for my booking due to covid (our flights had been cancelled and the borders are closed) and they told me to get in contact with the resort. I then got in touch with the resort who said I am able to get a refund I just need to get booking.com to do it. So back to booking.com I go, who try refer me to Agoda (they clearly don't know w…
1 star: Bad	Unethical, the worst customer service, provide no accountability or help or even understand what I'm asking. I've been provided the same useless responses from all different cust service representatives throughout the month. Standard response: "you may or may not be eligible for a COVID-19 special cancellation" "please check closer to the date" "please check our web/social media again in the near…
1 star: Bad	Zero customer service, They accept no responsibility and also do not help when things go wrong!! Almost impossible to contact and when you do they do not care!; Zero customer service, They accept no responsibility and also do not help when things go wrong!!; Almost impossible to contact and when you do they do not care!
1 star: Bad	A team of monkeys could run this company better!! I Think this perfectly sums up this company as described by a previous poster.An online helpdesk that is worse than useless then patronising advisors when you do get to speak to someone who should change there department name to the carnt /wont help department. If a hotel is closed then surely it is up to booking.com to help the customer retrieve …
1 star: Bad	Terrible.They pestered me to change my booking then changed it to the wrong dates and now can’t be contacted.; Terrible.They pestered me to change my booking then changed it to the wrong dates and now can’t be contacted.
1 star: Bad	So far my experience with booking.com has been good. However, once you need their help, their customer service is practically non-existent. I was supposed to be fully refunded for a cancelled trip due to the virus, and all they did was to refer me to the hotel. Of course I contacted them because I couldn't get a solution by the hotel... But no matter what you say/write, you just get an automated …
1 star: Bad	Never, ever use this company. The constant lies that they tell is an absolute shambles. I had a booking, admittedly a non-refundable booking, for the weekend of the 16th May to a hotel in London near the O2. Due to the booking at the O2 being cancelled we had no choice to try to cancel the hotel booking as the Government guidelines were the hotels were shut and the country was on lockdown. 5 phon…
1 star: Bad	I had an hotel booking through Booking.com. I was unable to use it because I couldn't leave the country due to Covid-19. Booking.com refused to give me a refund and the customer service was extremely poor.; I had an hotel booking through Booking.com. I was unable to use it because I couldn't leave the country due to Covid-19. Booking.com refused to give me a refund and the customer service was ex…
1 star: Bad	Refusing refunds during the pandemic. Trash company.; Refusing refunds during the pandemic. Trash company.
1 star: Bad	Very poor customer service. Made a complaint, had a reply that did not address the issue, sent further email, no response. In the meantime Booking.com sent a request to review their inept performance.; Very poor customer service. Made a complaint, had a reply that did not address the issue, sent further email, no response. In the meantime Booking.com sent a request to review their inept performan…
1 star: Bad	As with the review from ST, totally agree, I have sent several e.mails to booking.com asking for a refund as the hotel we were due to stay at closed due to virus. NOT heard a thing back from this useless company, you would think they would at least reply!!! A team of monkeys could run this company better!! Will never ever use them again!!!!! MH; As with the review from ST, totally agree, I have s…
1 star: Bad	Avoid this company. For over 5 weeks now I have been trying to get refund for accomodation cancelled because of Covid 19. The accomodation offered me cancellation without cost. I have provided booking.com with all the information they need to process a refund - in fact I sent it twice - but no response. They are denying me the refund and maybe sitting on the money if the accomodation passed it to…
1 star: Bad	I would have picked 0 stars if I could have. Searched for a room, found one and reserved it. Showed up and the desk clerk said my reservation was for 6 months away. Won't refund my money. Had to sleep in my truck because I didn't have enough money for a room there or somewhere else since booking.com took my money already. Window licking, waterheads; I would have picked 0 stars if I could have. Se…
1 star: Bad	I have been using booking.com for many years now and the one time I actually need help from them - NOTHING. I am very disappointed that they don't even try to help. Looking at other people's reviews it is clear that they don't value their clients. It is definitely the last time I'm using booking.com and will NOT RECOMMEND it to anyone.; I have been using booking.com for many years now and the one…
1 star: Bad	Will absolutely not help you in anyway. Pretend everything is fine, and nothing is their problem. There are many many other hotel sites you could book from, so please please book from ANYBODY BUT BOOKING.COM; Will absolutely not help you in anyway. Pretend everything is fine, and nothing is their problem.; There are many many other hotel sites you could book from, so please please book from ANYBO…
1 star: Bad	I used to be a keen user of Booking.com. Nothing has ever gone wrong with them whilst I've used them but you can only really judge the performance of a company when things do go wrong. With COVID-19, I tried getting a response from them regarding a booking for the end of May 2020 which I couldn't use as the airline had cancelled the flights indefinitely. Nothing - no communication and the hotel s…
1 star: Bad	I have to say I will never use this company again. I have used them for every holiday and weekend abroad (and we have quite a few each year) for the past twelve years. However, despite being physically unable to travel to Paris from the UK during the coronavirus outbreak, they refused every attempt to obtain a refund. They have behaved abominably - contrast their behaviour with Airbnb - a decent …
1 star: Bad	A very reluctant 1 star!! Had a four person booking at Prague centre maisonette with terrace and balcony on 13-16 april obviously no chance of getting there due to FCO travel restrictions. Messaged booking.com via the app, was told they had spoken to apartment and as it was a non refundable booking i couldnt have a refund. Messaged the apartment again via app, explaining situation was really no o…
1 star: Bad	Useless customer service, I am owed a refund for a holiday I booked through them. Holiday accommodation cancelled by the provider. Booking.com will not do anything to help, just tell me to contact the provider as the booking is with them. Provider is refusing to give refund. I wouldn't have been able to cancel the booking without incurring costs yet it seems booking.com place no such restrictions…
1 star: Bad	Awful, they take your money and bury their head in the sand. Booked to got to Italy in April, FCO advised against travel, airline cancelled flight (Ryanair gave full refund). Hotel in Italy was non-refundable but regardless, we were in lockdown at the time of the holiday, there were no flights and the hotel was closed because Italy was in lockdown. Was told a refund was not possible. So I am expe…
1 star: Bad	I had make a booking for a weekend in June in Berlin via booking.com with the non refundable option. However due to Covid19 I won’t be able to travel because Government restriction. Booking.com refused to give a refund or a voucher. They blamed the hotel not given the refund. In fact I called the hotel and the answer was booking.com won’t expect a cancellation from their end too. This outrages i …
1 star: Bad	I would not deal with these people, all they are interested in is taking your money for their profit. I am a Genius Level 2 customer of theirs and previously a regular user of them. But my mother died and I asked for their help to get my money back from the hotel where I was booked the next day. Bearing in mind they have all the power here. The hotel refused and booking.com were no help simply sa…
1 star: Bad	I booked a room in Copenhagen Plaza hotel through booking .com (Booking .basic) check in 12 may check out 14 may 2020 My flight and my cruise cancelled due to Covid19 I asked booking .com to change my reservation to Sept. 2021 they refused to change the reservation They said it's non refundable, I didn't ask for refund but I wanted to change the reservation for next year,later I contacted the hot…
1 star: Bad	Booked hotel for night to attend a concert.Concert cancelled due to Covid19 outbreak.Contacted booking.com to cancel hotel.I was charged a cancellation fee which I thought was unfair due to circumstance.; Booked hotel for night to attend a concert.Concert cancelled due to Covid19 outbreak.Contacted booking.com to cancel hotel.I was charged a cancellation fee which I thought was unfair due to circ…
1 star: Bad	I have made a booking for a hotel and i was charged. I obviously cancelled due to current pandemic and i was informed that there cancellation fees was charged. However, i was informed that the refund is not possible. Please contact me.; I have made a booking for a hotel and i was charged. I obviously cancelled due to current pandemic and i was informed that there cancellation fees was charged. Ho…
1 star: Bad	Booked through this Mob(Booking.com) I won't call them a Company only to find that they are really no more than a Middle man as they passed my booking onto another company(AGODA) When I Tried to move a Booking forward by 1 day due to the Corona Virus as the Cruise Ship I was meeting had been called in a day earlier it was impossible to get in contact with them. I got in touch with the Hotel & the…
1 star: Bad	Hi, Just a word of caution if you use or plan to use booking.com or are considering staying at Apartment Hyde Park Clifton Surry Hills NSW. I'm totally disappointed with their total lack of customer service. I cancelled an accommodation booking with Apartment Hyde Park on 19/03/2020 which was "within the allowed penalty free cancellation period" and to date, 7 weeks later I still have not receive…
1 star: Bad	We had really Bad experience with Booking.com company. We are a small hotel in Vietnam. We worked with them more than 7 years. We think the way they treated their parners or their guests only with the Reason MONEY and MONEY. Now when the problem happening you and all the guests in the world can understand SO WELL how exactly of this Company, only want to earn as much as possible Money. They don’t…
1 star: Bad	Had a booking placed in February for 1 night on the 29th May at Heston Hyde Hotel in London. I had not contacted them about a refund or anything yet as I still had not heard about my flight status. However this week I received an email from the hotel via booking.com informing me that they are unable to accommodate me on the date in question as they're only accepting key workers. They also informe…
1 star: Bad	I booked a apartment through booking.com for 2nd June but due to Covid 19 had to cancel was free cancellation. So cancelled two weeks ago apartment hasn’t refunded me so spoke to booking.com who have advised me I’m better off dealing with the host of the apartment by my self as they can help me more. Really clearly they don’t want to give me my money back. Or does booking.com have my money and do…
1 star: Bad	booking.com is a thing of a past even before their demonstration of incompetence time and time again in the last 2 years or so; booking.com is a thing of a past even before their demonstration of incompetence time and time again in the last 2 years or so
1 star: Bad	Due to stay in Budapest on 5th May-8th May and hooked my accommodation through booking.com as I have done for years. I pre-paid for my booking but when the COVID-19 restrictions came into place I contacted booking. Com to enquire. After several failed attempts and no replies from them I waited to see if my flights would go ahead. When my flights were cancelled and I knew due to government guideli…
1 star: Bad	Its been month and a half since the first call, hotel was closed for our dates so we never even cancelled the trip should have been automatic refund. 6 calls later and nothing is done. Every time i call is same story by tomorrow we will confirm and call u and never happens. I think no one will ever use booking.com anymore; Its been month and a half since the first call, hotel was closed for our d…
1 star: Bad	Cancelled my holiday on 8/4/20, on the 4/5/20 recieved email saying your Credit card was declined please update your Credit card, on the 6/5/20 got another email saying my reservation has been cancelled because my Credit card was invalid, yes it was invalid luckily there was insufficient funds in my account for them to take the payment, I then blocked Booking.com with the help of my bank as soon …
1 star: Bad	Same experience as everyone else by the looks of things. COVID-19 cancellation and told there was no specific travel advice against going to Bulgaria. It was supposed to be 16 March, if we had gone we would have been either spreading the virus, quarantined, or stranded. I work in travel and understand that there is a contract that covers cancellations. But I also know that many of the suppliers r…
1 star: Bad	If I could give 0 I would. The 'customer service team' do not read emails, take no ownership and just palm you off. Keep referring me to the hotel who have confirmed a refund but then the excuses 'the email is cut off' so I send a screenshot and 'it isnt clear who this is from'. You are despicable. The rest of the world are pulling together and you are working against us; If I could give 0 I woul…
1 star: Bad	very hard to get in touch with customer care. i am going to stop using booking .com; very hard to get in touch with customer care. i am going to stop using booking .com
1 star: Bad	Shocking to the core. I booked a hotel which had to cancelled due to Coronavirus, which stated non refundable. Why should we have to be out of pocket due to something that has been taken out of our hands. Pure greed by these people putting profits before their customers. I have contacted them twice now by there online chat with no answers from them. They have also wiped out all record of me conta…
1 star: Bad	Delays with refunds... it has been 4 weeks now, give me my money back that you have promised!; Delays with refunds... it has been 4 weeks now, give me my money back that you have promised!
1 star: Bad	Worst service ever! I booked several hotels from them for my vacation that impossible now due to coronavirus border restrictions introduced by governments. Booking.com declared force majeur itself and described it here: "partner.booking.com/ en-gb/help/legal-security/important-information-regarding-coronavirus", but hotels simply ignore this without implications! All support requests that I opene…
5 stars: Excellent	I am very happy and pleased with their service and staff. I recently book different hotels on my vacation. All the hotels were perfect. I really enjoyed my vacation thanks to booking.com. I will surely book for my vacation in the future.; I am very happy and pleased with their service and staff. I recently book different hotels on my vacation. All the hotels were perfect. I really enjoyed my vaca…
1 star: Bad	This company has some of the worst customer service I have ever come across. We booked a room with Sofitel via Booking.com paying for the room in advance. Subsequently Sofitel cancelled the booking due to The Coronavirus. Sofitel confirmed they had refunded Booking.com in full and that we should get a refund from Booking.com. However Booking.com are refusing to refund me despite confirming they h…
1 star: Bad	Not only no refunds from Booking.com but impossible to talk to them as messages are just relayed to the hotels. Since we as customers bought through Booking.com, one would have thought that they should have responsibilities to provide the service purchased, or refund if they can’t. The fact that they are an agency is irrelevant.; Not only no refunds from Booking.com but impossible to talk to them…
4 stars: Great	I was due a trip to Italy mid May, the hotels I had booked with (5 seperate hotels) have been difficult to deal with, however booking.com stepped in and helped me communicate with them. I now have refunds from 3 hotels, still waiting on 2. I booked non refundable hotels, but have managed to get refunds/free cancellation on them so far. Thankyou to Booking.com and their Twitter team who I have bee…
1 star: Bad	This platform is awful - Covid-19 hits, NONE of the hotels want to refund our money back, and booking.com does not give two cents! Yes, I understand that I selected a room that was non refundable. That does not mean they shouldn't show some sort of support or empathy. I will NEVER use booking.com again, and encourage the rest not to either! #boycott !!!; This platform is awful - Covid-19 hits, NO…
2 stars: Poor	Poor booking.com. seems they lost the plot with the airbnb-like competition. I was trying to search them for hotel near BUD airport and they have many with "Additional charges may apply" without specifying details of those charges, even when progressing in reservation. Hope dont see another CorVid-19 victim....; Poor booking.com. seems they lost the plot with the airbnb-like competition. I was tr…
1 star: Bad	First off I’ll say I’ve booked many times through booking.com without problems. Unfortunately you find out what a business is really like when you see how they deal with problems. We had booked three separate hotels in Austria for early June 2020. Corona virus has come along and sadly our flights got cancelled so we had to contact them to say we couldn’t go. Two of the three hotels refused to ref…
1 star: Bad	I made a hotel reservation for an event in May 2020. In February, the event was canceled, so I immediately canceled the reservation and received a cancelation confirmation. However, on May 3, 2020, my bank was charged for the stay. I contacted booking.com, which was of no help. They told me to call the hotel, which was ridiculous because it was booking.com's mistake. I do not recommend using book…
5 stars: Excellent	I personally don't understand all the bad reviews. If you booked a non refundable stay then it means its not refundable... no matter what. Simple as that. I feel like people are only here to complain, but I have only good experiences with booking.com. They give a good overview of all the accommodations available. That is all they do. It's not up to booking.com to give you a refund.; I personally …
1 star: Bad	Absolute shambles this company. Owners took billions in dividends, now they are seeking a state bailout whilst forcing hoteliers to refund whilst still charging the hoteliers booking costs. I used to use them a lot. I will never ever use them again. Disgusting company. Will now only use AirBnB; Absolute shambles this company. Owners took billions in dividends, now they are seeking a state bailout…
1 star: Bad	It's outrageous behaviour by booking.com as we are not even able to travel to the destination! Booking.com takes NO responsibility and their lack in customer service is appalling especially compared to other rental sites who actually offer their customers full refunds. I will never use booking.com again, why on earth should I support their business after being treated so badly!; It's outrageous b…
1 star: Bad	Have booked many a hotel on booking.com. Fairly easy process, until I booked a rather expensive hotel abroad for wedding week for July. I booked the hotel 10 months in advance and was surprised to see the money go out of my account straight away, unexpected. Then, Coronovirus hits, and I'm trying to get a refund on the room. They wont refund me. Booking.com blame the hotel, see terms and conditio…
1 star: Bad	We have had good luck with booking.com in the past. We normally split our twice a year European vacations between airbnb and booking.com. We had two hotels reserved in France with booking.com for the first week in May, one refundable and one non-refundable. We quickly cancelled the refundable one well before the time provided. We also noticed that the non-refundable one was closed and offering gu…
1 star: Bad	As a host, I haven't been paid for some cancellations while I have a strict cancellation policy and a grace period of cancellations due to corona does not apply to these booking periods. Instead, they have presented me with an invoice - for my own property! I have contacted booking.com multiple times - no response. At some stage, the invoice disappeared and some payments were partially made, but …
1 star: Bad	Useless customer service. Due to the Covid-19 situation I needed adjustment of my hotel booking and they only replied to me that they will contact the hotel and come back to me. But 2 months later I still had no response. I contacted directly the hotel and they explained to me that I have a contract with booking.com and should contact them. However once I clarified that booking.com are not helpin…
4 stars: Great	I had booked 10 hotels and a car rental with Booking.com for a Rockies fly drive.When the Pandemic hit us I had to cancel them all , some with no refund terms. I am pleased that Booking.com refunded every booking , promptely.; I had booked 10 hotels and a car rental with Booking.com for a Rockies fly drive.When the Pandemic hit us I had to cancel them all , some with no refund terms. I am pleased…
1 star: Bad	TAKING THE PAYMENT WHEN ALREADY KNOWING WE CAN'T GO ON THE TRIP BOOKED IT S JUST DISGUSTING.WHERE IS YOUR CONSIDERATION PEOPLE CANT AFFORD TO PAY NOW FOR THE TRIP WE ARE NOT GOING ON UNITL NEXT YEAR!!! WE WON'T USE YOU AGAIN!!!!; TAKING THE PAYMENT WHEN ALREADY KNOWING WE CAN'T GO ON THE TRIP BOOKED IT S JUST DISGUSTING.WHERE IS YOUR CONSIDERATION PEOPLE CANT AFFORD TO PAY NOW FOR THE TRIP WE ARE…
1 star: Bad	my name is christa evans though this review fell under my nephews name. i have used booking.com for many years. until now. because of covid19 my cruise was canceled and for that reason i could not use my booked hotel. i have contacted booking.com for 2 weeks now and they did not come up with a solution nor did they get back to me despite their promises. when push comes to shove they are useless. …
1 star: Bad	I can only agree with what was said. No help during Covid, they are not even answering! Now the property itself had agreed to waive a part of cancellation fee but I cannot get to anyone on booking just to find out how to technically do so. If the amount was not relatively small I would think about the legal action against them. Anyway - if you can avoid them - it is my sincere advice.; I can only…
1 star: Bad	About to eat $1000 due to the no refund policy. When you're banned entry into the country well I think an exception should be made. Only book through the hotel's website.; About to eat $1000 due to the no refund policy. When you're banned entry into the country well I think an exception should be made.; Only book through the hotel's website.
1 star: Bad	Can not get a hold of anyone at booking.com. Their covid policy apparently says you can get a refund, but there is not way to contact anyone or fill out a refund request form. Such bad customer service, I will not be using them in the future unless something is remedied. Go with AIRBNB instead they have been amazing.; Can not get a hold of anyone at booking.com. Their covid policy apparently says…
1 star: Bad	Don't use Booking.com!! As you have been seeing there is no refund for COVID-19, stay at home policy. They say it's up to the hotel, hotel says up to booking.com. Expedia has the same policy. Guess what I did get a refund. In times like this it shows a companies true character. NEVER AGAIN!; Don't use Booking.com!! As you have been seeing there is no refund for COVID-19, stay at home policy. They…
1 star: Bad	Don t use. Rob both the guests and the hotels. Book direct.; Don t use. Rob both the guests and the hotels. Book direct.
1 star: Bad	Lets just make sure post covid 19 to remove booking.com from out devices and to never use them again Happy to take money in some cases for bookings you are meant to pay in local currency on arrival and then simply take the money straight out of you account; Lets just make sure post covid 19 to remove booking.com from out devices and to never use them again; Happy to take money in some cases for b…
1 star: Bad	This company has no covid-19 policy and isn't offering any support or funding to help customers who have had their bookings cancelled by hotels. The company is interested only in keeping hold of the money they have made, whereas other like-for-like services are making available funds to issue both hotels and customers a refund. I can honestly say that once we are able to travel again, this compan…
1 star: Bad	My Villa booking with Island Villas in Barbados had to be cancelled due to Covid 19 as British Airways cancelled our flights. The villa company refused to refund my 50% deposit £3300. They did not even offer to hold the deposit for a future booking. Such poor customer service. Blunt response from them. Will not book with them again. We travel to Barbados every year. Airbnb refunded every customer…
1 star: Bad	Zero star! My booking was cancelled due to corona virus epidemic but yet not refunded. No response from the hotel and no assistance from booking.com. The ridiculous fact is that booking.com doesn’t take responsibility for the payment and just expects the hotels to handle it! So risky, so careless of customer rights... More, their prices are not competitive anymore... I should add that it is not t…
2 stars: Poor	Shambolic service, complete waste of time. I was contacted by booking.com, they told me I can change the dates of my trip. I provided them with the new dates and they said they had contacted the hotel to confirm everything, but asked me to contact the hotel directly to check availability. When contacting the hotel, the hotel told me booking.com had given me completely false information and that t…
5 stars: Excellent	I would highly recommend this service. The simplicity of the app is ahead of every other company in this field. Times are tough right now but they are trying there best.; I would highly recommend this service. The simplicity of the app is ahead of every other company in this field. Times are tough right now but they are trying there best.
5 stars: Excellent	I was very happy with the way they handle my reservation. We needed to make change and they did great effort contacting the hotel and negotiated a fair resolution. It’s not always the cheaper option but their service and availability are great; I was very happy with the way they handle my reservation. We needed to make change and they did great effort contacting the hotel and negotiated a fair re…
1 star: Bad	Like many others on here, booking.com have been a morally corrupt company during this times. No negotiation, no flexibility - just “no”. One of their advisors actually just said we could still travel to Italy as it’s only “advisory” not to. Seriously!!?? Always used these but from now on, no way! Just cancelled another booking I had with them for next April and I won’t use this again.; Like many …
1 star: Bad	Don't bother booking with this website, the refund process was painful and long winded to get my money back, the transaction fee was not refunded either. You have to say the magic words to get a refund i.e. the hotel cannot provide the service because they are closed, I booked several hotels with a different website and had no issues, only booked 2 here won't ever bother again; Don't bother booki…
1 star: Bad	Would not refund our money or even provide a credit when we couldn't travel to Japan for our vacation trip. Very sad, all of the other companies we used dealt with us nicely and provided refunds or credits.; Would not refund our money or even provide a credit when we couldn't travel to Japan for our vacation trip. Very sad, all of the other companies we used dealt with us nicely and provided refu…
1 star: Bad	Booked a non refundable stay in Singapore but due to Covid 19 our flights were cancelled and Singapore has now closed its borders. We contacted Booking.com to request a refund. They said no. We contacted the hotel, which is part of a large chain, they informed us that the entire chain was issuing refunds regardless of the booking method but we would have to get that refund from Booking.com, we re…
1 star: Bad	i had to cancel my hotel booking in Italy due to c-19 situation. Contacted the hotel and been advised that a voucher has been issued and sent to booking.com to be passed on to me. Since then i have been trying to contact these scammers. No response, acknowledgement whatsoever..Probably they will be re-selling the voucher...AVOID this company and deal with the hotels directly. THEY HAVE NO VALUE A…
1 star: Bad	We booked a hotel in Ibiza the LLobet apartments in Ibiza Town for 5 days in June before our sons wedding obviously everything has been cancelled due to Coronavirus but the hotel are refusing a refund or to change the dates for next year saying there is no availability for those dates :( funny when I looked on the website I could have booked exactly the same apartment as we had booked for this ye…
1 star: Bad	Booked an apartment for July, and payment was taken upfront. Cancelled well within the cancellation window for a full refund, no reply from the apartment direct and booking.com have been making me jump through hurdles to get the money back and weeks later still nothing! Awful customer service. Will not use them again.; Booked an apartment for July, and payment was taken upfront. Cancelled well wi…
1 star: Bad	It's ok when everything goes smoothly, but when you need help with booking, you're going to spend a long time with their Help Centre. It most likely comes out not everything you are booking is directly connected to booking.com. And quite often you'll be redirected to the owner of the property, who is unresponsible or will not discuss any changes in conditions even when the whole situation has cha…
1 star: Bad	Due to travel restrictions in Germany hostels for which I already paid cannot host me. At the same time they ddin't cancel my stay and what's more important they didn't return the payments. Meanwhile booking.com pretends they try to help but they do nothing and blame me because "they recommend to choose booking with cancellation and/or buy insurance to cover such things", Completly unrealiable an…
1 star: Bad	The worst partner, unscrupulous work! Unacceptable.; The worst partner, unscrupulous work! Unacceptable.
1 star: Bad	Booking.com does not stand by the customers who book through them. Shame on them and the hotels in France who took advantage of us (and many others) because Delta canceled our flight to Paris due to COVID-19. Yes, I understand two of our hotels had "no cancellation" policies. Yes, I understand they offered to let us stay at a later date; but in this economy, when is later?! I have no plans to tra…
1 star: Bad	First Hotel Reisen in Stockholm are Disgraceful for making money on innocent foreign peoples loss during Covid-19. All my flights and meeting cancelled with full refund but this hotel won't refund my hotel expense. Shame on you hotel reisen.; First Hotel Reisen in Stockholm are Disgraceful for making money on innocent foreign peoples loss during Covid-19.; All my flights and meeting cancelled wit…
5 stars: Excellent	I don't usually write reviews but had to based on my experience with booking.com. Like everyone else recently due to COVID19 we had to cancel all of our travel plans. We were 1 month into a 3 month trip to Asia and had all our accommodation pre-booked with booking.com. When we had to go home early because of the virus we had at least 12 upcoming trips booked on booking.com which we now couldnt ma…
1 star: Bad	Made a booking to stay at Hotel Bittenbal in Amsterdam. Asked if we should cancel due to emergent corona virus situation and were told it was business as usual at the hotel. Turned up the next day on 15th March to discover hotel we had paid for in full was totally shut up and clearly had been for some time. Could not get hold of booking.com. Had to stay in a sub standard hostel type accommodation…
1 star: Bad	Don’t use this service , they misled me into believing I would get a refund on a hotel that cancelled my booking and that was weeks ago , I have been trying to contact me , and they offer no resolution , in fact they are ignoring my emails , they have no number to call from Australia , I would not recommend them at all ....; Don’t use this service , they misled me into believing I would get a ref…
1 star: Bad	Complete scam artists. Booking.com are refusing all refunds in light of Covid-19 whilst the likes of Air BnB are returning customers deposits caused by this pandemic. What is worse is that we have a deposit down and the final installment is due tomorrow and Booking.com are trying to string it out and stall in the hope we allow the booking to continue into tomorrow and debit our account for the re…
5 stars: Excellent	I have booked at least 50 hotels through booking.com over the past 3 years or so and have never had any problems. Whenever I've had to change or cancel a non-refundable booking, the customer service agents have always been extremely helpful. Over the past 6 months, I have unfortunately had to cancel 5 non-refundable stays, firstly due to a typhoon grounding flights and now due to COVID-19. On bot…
1 star: Bad	I booked a weekend in marseille for rugby event. Small print for apartment i booked was from the moment booking confirmed there was a 50% cancellation charge. Also the apartment could collect full funds at any stage. Using app i clicked request to cancel thinking thats it. Put app away. Accept i was out of pocket by £300. 5months later with pandemic going on i find another £300 taken. The request…
1 star: Bad	My wife booked a stay in Portugal in January 2020 through Booking.com for 8 days in late April. The apartment she was due to stay in Casa de Sao Jose Lisbon, cancelled the booking due to Covid-19 situation, and offered to change for another date later in the year. My wife was unable to travel later so requested a refund under the COVID19 extenuating circumstances. My wife paid 840€ for her stay, …
1 star: Bad	Really poor experience for both guests and owners - absolutely awful web interface that makes it nearly impossible to get anything done quickly. 2 day lead time to get help with anything.; Really poor experience for both guests and owners - absolutely awful web interface that makes it nearly impossible to get anything done quickly. 2 day lead time to get help with anything.
1 star: Bad	I made a booking through booking.com for a hotel in Madrid for four days. They charge it on my credit card and due to the virus I tried to cancel my reservation with hotel and they said I had to contact booking.com. When I went on their website it asked for my reservation number or booking number and my passcode. I never received the passcode and when I go on their website they say I have no book…
1 star: Bad	Due to cancelled flight and travel restrictions could not attend our booking. Booking.com were absolutely useless in helping us get a refund (which we didn't get) and the operators I spoke to on the phone asked why I 'wanted' to cancel, I had to tell her to Google the coronavirus.; Due to cancelled flight and travel restrictions could not attend our booking. Booking.com were absolutely useless in…
1 star: Bad	this is the message i got from booking.com: "Unfortunately, The East London Hotel has informed us that they cannot accommodate you due to the COVID-19 outbreak. They have temporarily closed their doors in order to be able to stop the spread of the virus. We have three options for you to help resolve this situation for you. 1) Change your dates to a later date in the future. 2) Be relocated to an …
2 stars: Poor	In the past I have used Booking.com and found them to be great but when it comes to Covid-19 I have found that they are terrible at making decisions, communicating and keeping you informed. I booked 2 hotel stays (earlier this year) as I was travelling to London for May this year - from New Zealand. I paid for one stay and decided to pay for the other when I arrived. Problem is I cant get to the …
1 star: Bad	I am a owner that use Booking.com as one of the platforms allowing guest to use my home when visiting Atlanta. Other platforms have Damage protection. I didn't find that out until i had guest that decided to punch holes in the wall and cut furniture. Booking advised that they will only return the commission that the guest pay to stay. So i have $200 worth of damages, but they said I can have have…
1 star: Bad	Booking.com non refundable booking during COVID 19 lockdown: While other companies chose to offer refunds to their customers straight away, booking.com has chosen to take a staggered approach to asking clients to offer full refunds to customers. I have written to my hotel/ booking.com as soon as I found out (approx 1mth before my booking) that Amsterdam have announced a lockdown until 28th April …
1 star: Bad	Booked a hotel through Booking.com for July of 2020 in Ireland. With COVID 19 I had to cancel the hotel room when the tour I had booked for the week following was canceled. I canceled 10 weeks in advance and as per their policy of no refunds, they refuse to refund even though the cancellation was related to COVID 19. I will never use Booking.com again!; Booked a hotel through Booking.com for July…
1 star: Bad	If I could give them no stars I would utterly useless do not be tempted to use if anything goes wrong they won't give you a refund even when the hotel you have booked has gone into administration; If I could give them no stars I would utterly useless do not be tempted to use if anything goes wrong they won't give you a refund even when the hotel you have booked has gone into administration
1 star: Bad	BOOKING.COM has provided the worst experience possible. I have called in 4 times for an hour each time to get a refund. If you can't help get your customers money back, why the hell are you not out of business yet? Anyways, for all of you out there, AVOID booking.com! They will give u a hell of a time when it comes to getting your refund back!!; BOOKING.COM has provided the worst experience possi…
1 star: Bad	No real way to complain on booking when you feel you got scammed and they never reply to messages. Avoid and book somewhere else.; No real way to complain on booking when you feel you got scammed and they never reply to messages.; Avoid and book somewhere else.
1 star: Bad	Good for finding cheap rooms. AWFUL aftercare and service. I need to get an invoice to claim expenses, there is no way on the website to speak with someone or make a complaint- you can only contact the hotel, who don't reply and don't answer the phone. It's very frustrating.; Good for finding cheap rooms. AWFUL aftercare and service. I need to get an invoice to claim expenses, there is no way on …
1 star: Bad	Booking.com is terrible. I have booked hundreds of hotels on their app. Only time I needed to change the hotel (the hotel was CLOSED!!!) booking.com did not change it and never returned my money. I am not using them anymore.; Booking.com is terrible.; I have booked hundreds of hotels on their app.; Only time I needed to change the hotel (the hotel was CLOSED!!!) booking.com did not change it and …
1 star: Bad	Booked at easyHotel Berlin Hackescher Markt for the Lollapalooza festival in September, which was just cancelled due to COVID-19. Was told by the hotel my reservation is non-refundable, the festival cancellation has nothing to do with COVID-19 and they are refunding people only while the borders remain closed. Called Booking.com to which they stated there is nothing they can do as they are not ev…
1 star: Bad	These people are thief’s. Ever since co-vid 19 had happened they have stole money from so many customers, they stole money from 2 hotels in which I didn’t even stay in and using the virus as a excuse to con customers. Still haven’t been issued a refund. Thank god air bnb had arrived.; These people are thief’s. Ever since co-vid 19 had happened they have stole money from so many customers, they st…
2 stars: Poor	Pocket financial gain, huge amount of issues. You have to prepare yourself.; Pocket financial gain, huge amount of issues.; You have to prepare yourself.
1 star: Bad	Bad that they say its free to cancel and when you cancel you get no refund it's happen to me .been trying to get back over 100 pound for weeks .Another booking that I've just tryed to cancel and they have took the cancel option off the site even tho I've got another month too cancel it for free.so that's another 50 quid they have of mine .what's wrong with them there reputation is going down fast…
1 star: Bad	Happy to take their commission but when trying to get a refund absolutely not interested. Can’t travel due to lock down and easyJet not flying. Will never ever use them again or recommend.; Happy to take their commission but when trying to get a refund absolutely not interested. Can’t travel due to lock down and easyJet not flying.; Will never ever use them again or recommend.
5 stars: Excellent	So far the best COVID situation handling I've seen. Got all refunds, going to book more stays the same minute I can. Earned my loyalty 100%; So far the best COVID situation handling I've seen. Got all refunds, going to book more stays the same minute I can. Earned my loyalty 100%
1 star: Bad	I booked a hosted room at Manchester Quay for my daughter through Booking.com and paid for it via PayPal. She arrived after a long flight and despite it being 19.30 and the accommodation offering check in until 23.00, she couldn’t get hold of the host via phone or email. He left her alone in a strange city, after dark. Unforgivable in my view. Despite repeated calls to the number given on the web…
5 stars: Excellent	I go a refund within 48 hours. Compare to other companies this one deserves 5 stars only for that.; I go a refund within 48 hours. Compare to other companies this one deserves 5 stars only for that.
1 star: Bad	We had a booking with The House Of Toby Hotel in London but because of coronavirus the function we were attending was cancelled. The hotel and Booking.com have been completely useless. Booking.com said that they had contacted the hotel and they had agreed a refund. The hotel agreed on the telephone to a refund. Booking.com said it was a mistake and the hotel said they never agreed to a refund. Bo…
1 star: Bad	Devested. Before this I use to recommend booking.com to anyone. Whilst this virus has been going on my holiday has been cancelled. The property had took payment and are refusing to return it. Booking confirmed they would refund it themselves and are now saying they won't. Whilst everyone's anixetys are bad at the moment they have made this process so stressful. Not returning £300 of someone's mon…
1 star: Bad	Booking. Com gave confidential card payment details to Village Mayambe in Cancun Mexico without consent. Covid19 virus was already happening and I tried contacting hotel but emails were ignored. Two payments however were taken on 13th and 28th March to cover full payment. This is downright fraud. Hotel actually cancelled so should refund. Booking. Com emailed yesterday claiming they phoned. No th…
5 stars: Excellent	Had booked a hotel in Spain non refundable but due to coronavirus it was cancelled and I received my refund within a week great service from booking. Com and apartments La Caseta very happy customer; Had booked a hotel in Spain non refundable but due to coronavirus it was cancelled and I received my refund within a week great service from booking. Com and apartments La Caseta very happy customer
1 star: Bad	My hotel booking with booking.com was cancelled 24hours before date due to go .alternative accommodation offered and because of late cancellation I accepted.described as one mile from original booking and central.This description could not have been more wrong.it was 3 mile from centre and up very steep hills and I had described in my original booking I had walking difficulties. We stayed one nig…
5 stars: Excellent	I planned to write my review for a very long time, just the topic is very extensive, and could not get my thoughts together. When there was a bit more free time than usual, I immediately started writing a review. To begin with Booking.com has a very clear, convenient interface. So intuitive that even my mother, who is not very computer friendly, can independently find and book the right hotel wit…
5 stars: Excellent	Had a non refundable booking at hotel in Kiel Germany. When I had to cancelled it due to COVID-19 I contacted the hotel direct, as suggested by bookings.com, for a refund. The hotel decided to provide me with a refund via Bookings.com. I contact bookings.com on the phone and it was all sorted within 10 minutes. I received an email confirming the amount of the refund and when I should receive the …
1 star: Bad	Run away as far as you can from these people. They have no way of getting in contact with a live agent. Took me well over a month to get a refund after the corona virus. I was denied my refund over and over again even though I had screenshots to prove it. Finally emailed the head of customer service (google it, they don't willingly give it out) and was told I would receive my refund. I will never…
1 star: Bad	Yes I know I made a non refundable booking for May 2020 for my sons wedding which has had to be moved to September. I rang yesterday 21/4/2020 and asked to move my dates to coincide with the new wedding date checking with villa gale the hotel I originally booked into that rooms were available which they confirmed via live chat they would be happy to do their end only to be told by bookings.com th…
1 star: Bad	Like so many others have found booking.com worse than useless. Yes we know it was a non-refundable booking but surely this pandemic is unprecedented and refunds should be available. Hotel Derby in Interlaken took our money, all of it not a deposit in February at the time of booking and refuse to refund despite the fact that they will not be providing breakfasts, clean linen, cleaning of rooms, an…
1 star: Bad	Bad customer service, seem to be on repeat throughout the call, can't refund money, complete disgrace of a company.; Bad customer service, seem to be on repeat throughout the call, can't refund money, complete disgrace of a company.
1 star: Bad	Booking.com I am extremely disappointed with your service! I registered my property with Airbnb in a matter of minutes but Booking.com is failing to find my property. I have waited from the 26th of Feb 2020 to the 22 of April 2020 with no luck. I have phoned not less than 5 times only to be told "we looking into it", where is the customer service Booking.com?; Booking.com I am extremely disappoin…
1 star: Bad	Booking.com is the worst. I have called 9 times on the COVID-19 and was very patient. I was told that Booking.com had my money and would refund the amounts for two hotels in London. Now a supervisor told me that they will not refund anything and that the President of the United States does not have the authority to keep Americans! Has he not read or seen the news? Agents told me that I would get …
1 star: Bad	Wow, looks like I am not the only victim to Booking.com unethical ways! Like so many other complainants, Booking have refused to help me get my refund back from the Dobairro Suites in Lisbon. Despite knowing for a fact that all EU borders have been closed and I have no means of getting to Lisbon in the first place! My other travel reservations with Air bnb and Expedia have been successfully cance…
Kien Chibie; 1 star: Bad	I have been in communications with Booking and the two hotels H10 Palacio Colomera in Córdoba Eurostars Torre Sevilla and I had reservations for May 30 to June 5th. As I expressed, i am active dity military and have to abide by travel bans till June 30th preventing me from leaving the State and more or less the country. I have expressed this to the hotels and they are refusing to give me a refund…
1 star: Bad	Was in London for a day. Booked a hotel only for it to be cancelled upon arrival. Spoke to an extremely unhelpful 'customer service' member who advised me that he had found me an alternative location. Although it wasn't exactly close, I travelled to the hotel only to be told by the hotel staff that I wasn't booked. I contacted booking.com again & was told that I needed to pay again which I couldn…
1 star: Bad	I have lost my faith in Booking, This was the current situation It is a pity that due to COVID 19 we can not enjoy our planned holidays and celebrations. In our case, my family was going to visit us for our wedding celebration in Slovakia, staying some days in the beautiful Krakow. Unfortunately, the 1st of May was not a good choice for our celebration due to the suddenly spread of the Corona vir…
1 star: Bad	Never using booking again!!! I’m a geneus level 2 travel and book a lot of trip with Booking.com. But this was by far the worst experience i’ve ever had!! I bookes a booking basic and a third part Agoda was involved. Booking is holding my prepaid money. The resort approve my date changes but after several calls with Booking no help from them, they don't handle the case. ??????; Never using bookin…
1 star: Bad	Worst Service Ever I am only giving one star because it's impossible to give zero stars. I made a booking and was immediately contacted by the landlord who wanted me to rebook on a different (more expensive site). I contacted booking.com with concerns that my booking would not be honoured but they, after an "investigation" assured me that all would be fine. 6 months later the booking was cancelle…
1 star: Bad	Like many I had reservations with Booking.com that have been affected by the coronavirus pandemic. In many instances they have applied their Force Majeure procedure to protect customers (It is published in the internet). However this apparently is dependant on national governments posting 'the correct documentation' to satisfy Booking.com red tape. My reservations were in Zimbabwe who it appears …
doug; 1 star: Bad	Terrible experience. This company have proven to be completely useless when it comes to having a grievance against one of its merchant's. Basically upon arrival the apartment was uninhabitable with a wall hanging off and we refused to stay. All parties refusing to provide refund. Awful. Booking.com also refused to publish my experience of that particularly dodgy company - CONTINENTAL APARTMENTS B…
5 stars: Excellent	I read some (bad) reviews, but in my case booking.com were excellent and not only the website the hotel I made the reservation (St. John Island View Pensionne in palawan philippines on the dates May 5th to the 8th) also, returned the money smoothly, thanks booking.com and the hotel; I read some (bad) reviews, but in my case booking.com were excellent and not only the website the hotel I made the …
Joel Kent; 1 star: Bad	Booked a hotel, it cannot fulfil the booking as it has to be closed because of its government - refused refund. Totally ripped off but will get the money as it was on a credit card.; Booked a hotel, it cannot fulfil the booking as it has to be closed because of its government - refused refund. Totally ripped off but will get the money as it was on a credit card.
1 star: Bad	The most pathetic company I've ever came across! Never ever using it again. Money thieving f****** Stay clear everyone; The most pathetic company I've ever came across!; Never ever using it again. Money thieving f******; Stay clear everyone
1 star: Bad	Will not be using this company again! Customer service is basically non-existent. They seem to not give a d**k that there is a global pandemic going on and have no sort of sympathy for their customers.; Will not be using this company again! Customer service is basically non-existent. They seem to not give a d**k that there is a global pandemic going on and have no sort of sympathy for their custo…
5 stars: Excellent	I booked a hotel in Hong Kong but had to cancel as a result of COVID-19. The hotel refused to refund me despite my flight having been cancelled by the airline. They would adamant that no refund would be made. Booking.com were not so unreasonable and made a goodwill refund. The result of this experience with Booking.com is that I will always use them for future accommodation and flight bookings.; …
1 star: Bad	Do not trust this company, use them to search then book direct with accomodation unless you want to be double booked, over-charged then ignored. Worst customer service ever; Do not trust this company, use them to search then book direct with accomodation unless you want to be double booked, over-charged then ignored. Worst customer service ever
1 star: Bad	Will not use booking.com in the future. No help from them on cancellations due to Covid19. Airbnb is at least helping us with refunds and travel credits on future travel.; Will not use booking.com in the future. No help from them on cancellations due to Covid19.; Airbnb is at least helping us with refunds and travel credits on future travel.
1 star: Bad	Thieves They did not even give us their (mind you, completely ungenerous) 'cancellation' refund. Called and emailed on numerous occasions. They said they will contact the hotel and get back to us, and further assured they will uphold their refund policy if they 'failed' to contact the hotel. They never called back. Expecting a call, it never came. Expecting a refund like they said on the phone, n…
1 star: Bad	NO DEPOSIT BACK IN CASE OF FREE CANCELLATION !!! I booked accommodation in APARTMENT JERI DELUX IN IZOLA on 12.01.2020 for August 2020. I paid 345.00 EUR as deposit to secure the booking under conditions "FREE CANCELLATION til 17.07.2020. I cancelled my booking on 14.03.2020 and till now I haven't received my deposit back. THIS IS A REGULAR STEALING MONEY.; NO DEPOSIT BACK IN CASE OF FREE CANCELL…
1 star: Bad	client : please refund for my hotel booking as the hotel is closed during lockdown. booking.com : REFUND IS NONE OF OUR BUSINESS,; client : please refund for my hotel; booking as the hotel is; closed during lockdown.; booking.com : REFUND IS NONE OF; OUR BUSINESS,
1 star: Bad	Booking its totally rubbish company......piec of poo. Don't care about customers, don't answering for email.....its totally rubbish company. Don't have any respect to customers. I was booked holiday to Santorini paid £1.500, and because of Covid-19, Greece hotels shutdown and I can't go ?? and Booking don't want refund my money........avoid that company.; Booking its totally rubbish company......…
1 star: Bad	The worst customer service ever. Neither valid phone numbers nor email addresses on their webiste. The do not answer to any messages posted thru their website. Hopefully after COVID they would be smashed away from the market.; The worst customer service ever. Neither valid phone numbers nor email addresses on their webiste. The do not answer to any messages posted thru their website. Hopefully af…
1 star: Bad	If I could give zero stars I would. What an ***hole company....earns billions of dollars but wants support from the Dutch government while at the same time avoids paying taxes!!!!; If I could give zero stars I would. What an ***hole company....earns billions of dollars but wants support from the Dutch government while at the same time avoids paying taxes!!!!
1 star: Bad	If I could give them zero stars, i would. I cannot travel to Italy because of the coronavirus pandemic. Obviously. Booking.com refused to cancel any of my rooms for this trip. They wanted to charge me $631 for my room in Cinque Terre that is closed completely. They want to charge me $70 for each night I have in Chicago before and after my non existent trip. My flights have been cancelled. I can n…
1 star: Bad	I have holiday booked true Booking.com for April to Philippines, now all my flight got cancelled and the country is lockeddown, I payed 1100€ for my accommodation and now Booking.com doesn’t want to refund money back because my booking is non refundable, but how to get there they don’t mind. I’ll never book again with them. That’s not fair for people at the moment, everyone lost the jobs and have…
1 star: Bad	In this time of Corona virus be very careful if making a reservation for the future with Bookings.com. I have just lost £126.61 to them. I made a booking which stated 'you can cancel for free'. I had up until the 24th of March to cancel, I cancelled on the 19th of March. I have spent the last 3 weeks trying to contact Bookings.com to return my money with no success, all I get is no reply messages…
1 star: Bad	Avoid Booking.Com at all costs, no support during Covid 19. obviously unable to travel abroad, contries will not allow you entry even if you were able to get a flight. but no support with regards to cancelling hotel bookings. once we are in a position to travel again, we will remember which companies have been fair in there treatment of customers. I Think Booking.com will be one people remember f…
1 star: Bad	BOOKING.COM SUCKS. THERE IS A CORONA VIRUS IN THE WORLD AND THEY DONT WANT TO GIVE ME MY REFUND BACK? WHO THE HELL DOES THIS? DO THEY WANT ME TO SWIM FOR TURKS & CAICOS FROM MIAMI OR BUY A BOAT TO GET TO THE HOTEL? THEY MAKE NO SENSE. THEY WOULD NOT FO NOTHING TO GET YOU THE MONEY BACK. I WOULD NEVER SEPARATE ANOTHER TRIP WITH BOOKING.COM. HOPEFULLY THEY RUN OUT OF BUSINESS RIGHT IN THIS MOMENT. …
1 star: Bad	Will never use booking.com again Cannot get through to customer service. They pass you from pillar to post Cancelled due to coronavirus, before check in time and still got charged.; Will never use booking.com again; Cannot get through to customer service.; They pass you from pillar to post; Cancelled due to coronavirus, before check in time and still got charged.
1 star: Bad	I booked a small hotel on 1/10/19 through booking.com. They immediately took £99.00 from me via Paypal. I have had to cancel due to Covid19. I contacted the hotel who were happy for me to cancel for free and then rebook for next year. I had to do this via booking.com who then cancelled my booking and sent an email saying I could cancel free of charge and would get a refund of the £99.00. On the s…
1 star: Bad	I thought that booking through Booking.com would give me some sort of protection, however I have lost around £800 for a trip that I was not able to go on due to the travel restrictions. The property has decided to block my number and not respond to any emails, and refused a refund even though our flights were cancelled and we were not physically able to attend the booking. It is unjust and unfair…
1 star: Bad	All, be careful when you are using Booking.com. It will scam you! Recently I tried booking a hotel via Booking.com. The App showed "Booking Failed" twice. After that I received two confirmation emails and being charged twice. One was refunded but the other one was not refunded, even though I've tried many times contacting both Booking.com and the property.; All, be careful when you are using Book…
1 star: Bad	A friend recently had to cancel a trip due to the Covid-19 pandemic, but Booking.com only refunded half of her money. It's absolutely disgraceful for this company to refuse full refunds & profit from the misfortunes of its customers, especially during a time of an international health crisis. Do not use Booking.com!; A friend recently had to cancel a trip due to the Covid-19 pandemic, but Booking…
5 stars: Excellent	After a long month of battling with hoseasons for a refund after my holiday was cancelled, i phoned booking.com who couldbt be more helpful, gave the hotel 2 days to confirm it was closed then had a full refund issued to me with no cancellation fees; After a long month of battling with hoseasons for a refund after my holiday was cancelled, i phoned booking.com who couldbt be more helpful, gave th…
1 star: Bad	Will never use this company again. Took our money during Covid pandemic and would not give us any refund. Expect us to pay even more to rebook for next year. Avoid this company AT ALL COST!!!; Will never use this company again. Took our money during Covid pandemic and would not give us any refund. Expect us to pay even more to rebook for next year. Avoid this company AT ALL COST!!!
3 stars: Average	This has been cancelled due to the lockdown re Covid 19. They say a refund is not available as their Booking.com₦̳Ʉ̳₥̳฿̳Ɇ̳Ɽ̳ ̳+̳'̳'̳1̳ ̳'̳'̳'̳8̳'̳'̳'̳ ̳5̳'̳'̳'̳ ̳5̳ ̳'̳'̳'̳ ̳4̳'̳'̳ ̳8̳'̳'̳ ̳5̳ ̳'̳'̳O̳'̳'̳4̳'̳'̳'̳'̳O̳'̳'̳'̳'̳'̳7̳ Booking.com₦̳Ʉ̳₥̳฿̳Ɇ̳Ɽ̳ ̳+̳'̳'̳1̳ ̳'̳'̳'̳8̳'̳'̳'̳ ̳5̳'̳'̳'̳ ̳5̳ ̳'̳'̳'̳ ̳4̳'̳'̳ ̳8̳'̳'̳ ̳5̳ ̳'̳'̳O̳'̳'̳4̳'̳'̳'̳'̳O̳'̳'̳'̳'̳'̳7̳ Booking.com₦̳Ʉ̳₥̳฿̳Ɇ̳Ɽ̳ ̳+̳'̳'̳1̳ ̳'̳'̳'̳8…
1 star: Bad	Complete con artists. They show a listing saying you can reserve now and pay at the property when you check in and then take the full fee from your bank the next day. I have spent weeks trying to sort this out and have basically been told I won't get my money back. I have reported them to Trading Standards which I'm sure they're used to by now.; Complete con artists. They show a listing saying yo…
1 star: Bad	Booked for hotel in wales through booking.com could not go due to start of lock down train cancelled which train company refunded as for booking . Com never replied to e mails terrible customer service what goes round comes round will never use again and advise others not to; Booked for hotel in wales through booking.com could not go due to start of lock down train cancelled which train company r…
1 star: Bad	I had to cancel a Singapore booking due to covid-19 - impossible to contact Booking.com directly, their standard response on their website is 'contact the property'. I booked with you Booking.com, not the property, you took my money and will not refund it! Terrible customer service!; I had to cancel a Singapore booking due to covid-19 - impossible to contact Booking.com directly, their standard r…
1 star: Bad	My complaint is not only about Booking.com as they are an intermediary. I booked a stay with Nice Stay Ltd in Cambridgeshire. This has been cancelled due to the lockdown re Covid 19. They say a refund is not available as their prices are competitively set. Under normal circumstances we would be going. I have asked for a deferrment to a future date. They have refused and are not being flexible at …
1 star: Bad	have paid in full for apartment in Ixtapa but now cancelled due to corona find they have charged me a further £66 and now impossible to contact anyone to ask why, website is a joke no where to email or message they make it so difficult so you just give up. Do not use them airbnb is so much better and easier when there are issues.; have paid in full for apartment in Ixtapa but now cancelled due to…
1 star: Bad	this is the worst customer service I have ever received! My flight was canceled due to coronovirus incident and booking does not force the property to waive the fees and get my money back! this is unacceptable!; this is the worst customer service I have ever received! My flight was canceled due to coronovirus incident and booking does not force the property to waive the fees and get my money back…
1 star: Bad	this is the worst customer service I have ever received! My flight was canceled due to coronovirus incident and booking does not force the property to waive the fees and get my money back! this is unacceptable!; this is the worst customer service I have ever received! My flight was canceled due to coronovirus incident and booking does not force the property to waive the fees and get my money back…
1 star: Bad	I had a booking made through booking.com for the ibis Budget saint-omerCenter in Calais. When the COVD19 Virus started i initially contacted the hotel to postpone my trip to later in the year but i received no reply. I then contacted Booking.com directly with the same question and they too said they received no reply. I then raised the question directly to Booking.com that is it possible the hote…
1 star: Bad	Still waiting for money refund from Fiesta Resort in Costa Rica, bad enough in self but Booking.com doing nothing, don’t even reply to emails. They have the power to sort these hotels out as they can affect a lot of future income, but instead they do nothing. If I don’t get a reply to my latest email I am reporting them to the Government Corona Virus Business Complaints Service!; Still waiting fo…
1 star: Bad	"booking.com" Very simply. I have make the cancelation of the hotel at Zanzibar - month ago ( free of charge according the booking.com conditiones ). No any "e-mail" about the solution, nor money back. Libor; "booking.com" Very simply. I have make the cancelation of the hotel at Zanzibar - month ago ( free of charge according the booking.com conditiones ). No any "e-mail" about the solution, nor …
1 star: Bad	Tried to cancel a booking due to the event being cancelled because of covid19. Requested a fees waiver from the property directly and through booking.com Have had no response from either, even after requesting updates from booking.com Have now lost all of the booking money. Do not use they have no interest in assisting their customers. Awful company; Tried to cancel a booking due to the event bei…
1 star: Bad	We booked a room at the Hampton Inn Cincinnati Airport South in January through Booking.com for April 19th, 2020. We had to cancel and did so on March 10th, 2020. Booking said it was not their responsibility. Hampton Inn said it was not their responsibility Although it was obviously a Booking.com issue. The reservation was canceled, but no refund was given. We also had to cancel a reservation at …
1 star: Bad	It's a pity one has to give even a single star to this enterprise. Their cancellation costs vary from 0% to 110%. On my trip to Portugal in May the cancellation cost according to booking.com for my four reservations were 0-110-50 and 84,4% of the sums I had paid. I'm now waiting for either the hotel (Vila Recife in Albufeira) or booking.com to send me an invoice on the 10% loss they suffered. Por…
1 star: Bad	Absolutely abysmal company with no compassion or scruples! Booked a 2 night stay at a good price. A few days later received an email from Booking.com saying they had cancelled our booking as the price they had quoted us was incorrect. When we queried why they had just cancelled our booking without speaking to us first their attitude was “couldn’t care less” we made a mistake so we’re going to adv…
1 star: Bad	Always used Booking.com but not anymore. Hotel has guaranteed me a refund (written confirmation in email) as I’m unable to make my trip to Berlin due to the travel restrictions implemented by the Foreign Office on UK Nationals ability to travel. Booking.com have refused my refund on the basis the UK is not on their “list”. Refuse to tell me what this list is and what the criteria is and I need to…
1 star: Bad	Money, money, money, money anything else they don't care.; Money, money, money, money anything else they don't care.
1 star: Bad	I rented a car through booking.com, and bought a full insurance (peace of mind). Behind the scene, the service providers were rentalcars.com and ultimately Thrifty/Hertz. As a result, we had to buy, at Madera's airport, another insurance, of which the cost turned out to be higher the full cost initially foreseen, which I also had to keep. I tried to obtain through booking.com the details of this …
4 stars: Great	Had a reservation for a hotel (refundable) which I had to cancel due to the virus and travel cancelled. Refund was issued promptly.; Had a reservation for a hotel (refundable) which I had to cancel due to the virus and travel cancelled. Refund was issued promptly.
1 star: Bad	As others have shared, they would not refund due to COVID-19 stating there are no domestic travel restrictions. My state is on a stay-at-home order, but per booking.com that is not a sufficient government restriction to use their forced cancellation clause. I definitely expected better in this hard time.; As others have shared, they would not refund due to COVID-19 stating there are no domestic t…
1 star: Bad	Didn't get a refund when hotel closed due to coronavirus.; Didn't get a refund when hotel closed due to coronavirus.
5 stars: Excellent	Straightforward rules, dedicated team. Even when being overwhelmed by COVID-19 situation, they have a solution to get a voucher or in many cases a full refund. Surely all these whiny people here booked non-refundable, being cheap af. Being surprised when they get no refund. Think before you book!; Straightforward rules, dedicated team. Even when being overwhelmed by COVID-19 situation, they have …
1 star: Bad	Made a booking through booking.com for March for a property in Dublin, Ireland. The Uk government announced a lock down and banned non essential travel and my flights were cancelled. The property refused to give a refund. A booking.com agent told me it’s best to cancel the booking with a cancellation charge of €200 and apply for a full refund later when they have updated their policy. I call 3 we…
5 stars: Excellent	Received refund for taxi transfers within 2 days - great service and so, so simple; Received refund for taxi transfers within 2 days - great service and so, so simple
1 star: Bad	As being a good customer of booking, I am quite upset due to their customer relations during this covid period. I had a reservation through booking in Italy and unfortunally since all flights are cancelled I asked for cancallation and request refund due to mentioned force major issue. The hotel replied my request negatively. I was trusting booking in this regard. They request some documents than …
1 star: Bad	Booking.com have basically washed there hands of their customers, putting the onus on hotels to refund anyone’s money if they feel like it. To quote their bulls**t “they have special procedures in based of information from the World health organisation advice and official travel bans, if none of this applies to your booking normal conditions apply”. W.T.F! We are in the midst of the biggest pande…
1 star: Bad	Where do I start these absolute jokers give zero help towards paying costumers that have booked a hotel through them due to the on going covid-19 pandemic. Booked 2 nights all inclusive in a hotel in Portugal, they are now saying it's not up to them to offer the refund. Other booking sites are either offering some sort or refund or being helpful. Sort yourselves out booking.com this is no ones fa…
1 star: Bad	Do not use booking.com!!!! Similar to the below reviews, unable to attend our stay due to lockdown and covid19 situation. After speaking to Benjamin on the customer service team I was shocked to find out that according to him the UK is in fact not on lockdown!!??? And that despite not being able to leave our house and our cancelled easyJet flights we could still have attended our reservation in A…
1 star: Bad	I have used booking.com for years and found them efficient. However, in the #Covid19 they sent me a message saying I could have a refund after they canceled my holiday. I have not received a refund and they have no changed their mind to pass the buck of responsibility #No refund #no support. Just happy to take booking fees and #RUN! When this is over I will not use booking.com ever again. Book di…
1 star: Bad	Worst site uve ever used, firstly I booked a hotel in Prague for 3 nights, which was cancelled due to government closing their borders over covid 19, firstly the hotel stated that I paid on arrival but instead took money as soon as I booked it thru booking.com, Secondly bookin.com took weeks even to reply Thirdly they still haven't gave me refund, Will never use these clowns again; Worst site uve…
1 star: Bad	Booking made some months ago for a hotel in The Netherlands who have closed due to the pandemic We are due to stay for 3 nights on 6 May. Flight has been cancelled by carrier. We have no wsy of travelling to The Netherlands. The booking was a "non refundable" booking. Surely the fact that the hotel are closed means I should not pay. Apparently not so, as The Netherlands are not on "total lockdown…
5 stars: Excellent	Booking.com have been extremely helpful in resolving an issue I had with a pre-paid booking, thank you for your assistance.; Booking.com have been extremely helpful in resolving an issue I had with a pre-paid booking, thank you for your assistance.
1 star: Bad	Booking.com is not supporting customers during Covid-19. We paid £1000 for accomdation in a country that is in lockdown so we cant go and booking.com will not issue a refund or a voucher. Airbnb, Expedia, Hotels.com are all helping customers to receive a refund or voucher.; Booking.com is not supporting customers during Covid-19. We paid £1000 for accomdation in a country that is in lockdown so w…
5 stars: Excellent	I needed to cancel a non-refundable booking due to COVID-19 issue and asked if I could have a part refund due to this unusual situation. Although it's economically bad period for the hospitality and booking sector, but Booking.com still did a full refund. I highly appreciate it.; I needed to cancel a non-refundable booking due to COVID-19 issue and asked if I could have a part refund due to this …
1 star: Bad	Very well organized racket, I threw the application away; Very well organized racket, I threw the application away
1 star: Bad	in this difficult days this company works like they own the hotels and don't give a chance to those "partners" to have opinion about reservations; in this difficult days this company works like they own the hotels and don't give a chance to those "partners" to have opinion about reservations
1 star: Bad	One thing they advertise during this pandemic yet a totally different story you have to face when trying to cancel bookings because your country is under lockdown and flights have been cancelled.; One thing they advertise during this pandemic yet a totally different story you have to face when trying to cancel bookings because your country is under lockdown and flights have been cancelled.
1 star: Bad	Booking.com are thieves that take your money and won’t give it back even when all the world is shut for business from the Corona virus. I have tried for weeks to get refund but still they do nothing. I had to contact PayPal to sort them out. Do not trust this company they are crooks.; Booking.com are thieves that take your money and won’t give it back even when all the world is shut for business …
1 star: Bad	Never PAY IN ADVANCE!!!They just take my money and don't care about Corona Virus they say your reservations is non refundable I pay 6 months in advance and now I have to go on holiday whit Corona Virus in hotel in Amsterdam ...; Never PAY IN ADVANCE!!!They just take my money and don't care about Corona Virus they say your reservations is non refundable I pay 6 months in advance and now I have to …
1 star: Bad	Yes, it's official! Booking.com is now operating as if it was hotel owner or even worse; an industry regulator!; Yes, it's official! Booking.com is now operating as if it was hotel owner or even worse; an industry regulator!
1 star: Bad	covid-19 is closing down hotels around the world but booking.scum are not interested removing their cancellation fee from services that are not there.; covid-19 is closing down hotels around the world but booking.scum are not interested removing their cancellation fee from services that are not there.
5 stars: Excellent	I used booking and will never use them again, my security deposit was never refunded when I've been told on several occasions it would be also, they cancelled my appointment in the system even though we stayed there. I've never experienced this ever at Expedia. Finally spoke to a manger and he did get my issue resolved; I used booking and will never use them again, my security deposit was never r…
1 star: Bad	No respect and no support to the partners. Booking.com is 99% in favour of the clients and is placing its Partners always in an uncomfortable position. It's commission is calculated over the final rate including the taxes!! This is happening in Greece. But established giants have only one option when acting like this.. to finally loose the trust of their partners and booking.com will be left with…
1 star: Bad	After a month of no communication I have been informed that Booking.com will take no responsibility for my hotel taking my money for the booking and not refunding when I was unable to travel due to the enforced lock down, I believe they are profiteering from the epidemic and will be informing the relevant government bodies when this is over and it is appropriate to do so. Shame on you Booking.com…
1 star: Bad	After a month of no communication I have been informed that Booking.com will take no responsibility for my hotel taking my money for the booking and not refunding when I was unable to travel due to the enforced lock down, I believe they are profiteering from the epidemic and will be informing the relevant government bodies when this is over and it is appropriate to do so. Shame on you Booking.com…
1 star: Bad	No respect and no support to the partners. Booking.com is 99% in favour of the clients and is placing its Partners always in an uncomfortable position. Especially in the coronavirus ERA... But established giants have only one option when acting like this.. to finally loose the trust of their partners and booking.com will be left with no hotels to offer to its clients...; No respect and no support…
1 star: Bad	The practises they follow are very frustrating, both for customers & hotels.; The practises they follow are very frustrating, both for customers & hotels.
1 star: Bad	After a month on the ph everyday with this shower of Bxxxxxxxs they have agreed to refund my app booking even though it was a refundable booking they 1st wanted 1 keep 225 of my booking when I then told them we’re 2 go they said tough we are keeping the lot bcause I chose not 2 stay x when I said the reason was that both sides were on lockdown they were like border stil open come down ur app is h…
1 star: Bad	We have been trying to navigate booking.com as hosts with 10 properties listed. To sum up booking.com they are only interested in extracting money from both parties (guests and hosts). They are never there for you when you really need them to help facilitate a booking, this is especially evident under COVID-19 where we have been forced to cancel all future bookings secured due to force majeure an…
1 star: Bad	DO NOT USE THIS BOOKING AGENT, YOU WILL GET RIPPED OFF. I would think again before booking anything through Booking.com. All they are interested in is taking your money. The first sign of a complaint they don't want to know. In fact they are impossible to actually get hold of. They do not check if what they are advertising is what it says it is and when you arrive you will find that it does not m…
1 star: Bad	Thieves. Not only were we double booked and stranded after hours driving. They then made us pay for the replacement and a month later we are still waiting for £400 refund. No reply to emails and cant get through on automated call as our booking is in the past, they have our money so they don't care.; Thieves. Not only were we double booked and stranded after hours driving. They then made us pay f…
1 star: Bad	Its very difficult to get any response from this company and they will not help when the owners refuse to refund anything. I sent emails re their policy but no response. Will never book with them again; Its very difficult to get any response from this company and they will not help when the owners refuse to refund anything. I sent emails re their policy but no response. Will never book with them …
2 stars: Poor	Booked 4 nights at the Cottage in Belford, Northumberland, paying £280. There was no option to pay extra for cancellation. Due to Covid 19 it looks like we will be unable to go so rang the owner. She was totally unsympathetic and refused to rebook or refund the money, with the excuse that Booking.com deal with everything. Their site says no refund is possible. Utter rip-off!; Booked 4 nights at t…
1 star: Bad	Just rang Booking.com numerous times to try and cancel my booking in April as hotel closed due to covid19. Booking.com don’t recognise my confirmation number they sent me on there App do they cannot do anything as no record of booking. Total rip-off I’ve lost my £78. Spoke to hotel who cannot help me either. Total joke Never use Booking.com again.; Just rang Booking.com numerous times to try and …
4 stars: Great	I forgot to post when I went to Paris tuck my girlfriend in February and I was so scared of Reading all the reviews but not one think was wrong the hotel was payed for and perfect the flights were fine if I had one think to say the staff were a little rude but apart from that we had amazing holiday and was so cheap I would use them again; I forgot to post when I went to Paris tuck my girlfriend i…
1 star: Bad	Do not use booking.com. Booked for May but due to Covid 19 event cancelled so must cancel hotel. Automated sytems will not accept confirmation numbers so unable to contact them and hotel say they cannot cancel if booked through booking .com. Have been trying for two weeks on and off. Tried again today, same teamspinse. Stay away from this site.; Do not use booking.com. Booked for May but due to C…
5 stars: Excellent	I have used Booking.com for sometime now amongst other companies and in this uncertain time that we are all in they have refunded my non refundable hotel booking , I fully appreciate this therefore will continue to use them in the future; I have used Booking.com for sometime now amongst other companies and in this uncertain time that we are all in they have refunded my non refundable hotel bookin…
1 star: Bad	Charged me, and didnt pay the hotel two times I have used them. So I was double charged on both ends, I tried to call for assistance and was not able to connect withanyone as their customer service is only reachable if you use your code, which mine was expired two days after my stay at the hotel. I tried to email, and got no help. Wrote an email to them in english and was responded to in French. …
1 star: Bad	Cancelled a party and relax apartment 17-3-2020 11 days after booking inline with the legal 14 day online purchase consumer law refund guidelines to be eligible for a full refund due to travel restrictions currently. Host won't answer booking.com messages to company and is palming me off. Spoke to booking.com today still got no further. Have taken my money, confirmed cancellation request over 2 w…
1 star: Bad	Scam alert. I had a trip planned for Easter but had to cancel because the country I was going to travel to declared the state of emergency due to COVID, closed its borders, grounded all planes and shut hotels down. I had some non-refundable bookings with hotels.com and airbnb and they both refunded the complete amount, and it only took me a few clicks. I spent hours trying to get a cancellation f…
1 star: Bad	I booked a room for a conference in March that was cancelled due to covid19 guidance. The hotel itself were happy for me to get a full refund. I have spoken to 5 people so far who have said that because the booking was done via one of their 3rd party agents Agoda. They cannot issue one. I have been loading with the conference centre hotel who still say they’re happy for me to have it, a third par…
4 stars: Great	Having read some of the negative reviews, I had to leave a negative review as I was getting nowhere with trying to get my money back for a parking booking. After leaving my review I emailed the CEO - Matthew Pack, who has in the last 10 minutes emailed me to say that I will be getting a full refund. ‘They are waiving all cancellation fees even for non-flex special offer bookings’. I have now been…
1 star: Bad	Try and book straight from hotels whenever possible... These guys certainly make it easier to spend your money. Hotel agreed to issue me with a refund but couldn't because payment was processed through Booking.com. Called them and, well, of course, they said they couldn't give the money back. Thanks for nothing, will definitely avoid using in the future.; Try and book straight from hotels wheneve…
1 star: Bad	During the Covid 19 pandemic we requested a refund for a stay at Harlow hotel in Essex. Booking. Com would not refund it and want to charge an additional £75 cancellation fee. F..ck wits will make sure I never use you again; During the Covid 19 pandemic we requested a refund for a stay at Harlow hotel in Essex. Booking. Com would not refund it and want to charge an additional £75 cancellation fee…
1 star: Bad	Booked a few times with booking.com. I can't really judge them good or not for those few times, they just did what they were supposed to do. However, in this difficult times, they did nothing at all to help a bad situation. I had booked a non refundable room and then the Portuguese government advised against any trips outside the area we were in. The property ignored the emails I ve sent to get a…
1 star: Bad	I've been a user of booking.com for years (about 20 trips) and my experience had so far been a good one. However, Singapore became off limits and so I emailed the property who said it was non-refundable as I booked a non-refundable room. I understand that. HOWEVER I then received an email from booking.com saying that as Singapore had become off-limits I would be eligible for a free cancellation. …
5 stars: Excellent	With everything that is going on at the moment and the bad reviews that people have written I am very happy with them they didn't give me any problems and return my money straight away thank you; With everything that is going on at the moment and the bad reviews that people have written I am very happy with them they didn't give me any problems and return my money straight away thank you
1 star: Bad	Time wasters. Horrible booking system. Such a LOW quality companies should never exist. Shame on you; Time wasters. Horrible booking system. Such a LOW quality companies should never exist. Shame on you
1 star: Bad	It is ridiculous that no-one is actually taking in consideration that we cannot get to Malta because flights are cancelled and bookings.com have done nothing about it neither the owner. This is unacceptable that owner is not even responding to emails or phone calls, just email with one sentence - "so sorry to hear that" Really? I have asked many times what options they can offer, not my fault COV…
1 star: Bad	ABSOLUTE SHAMBLES OF A COMPANY. Booking.com has no duty of care for It's customers. They made that perfectly clear in their emails. After being downgraded at our hotel in Zanzibar with very little help and no duty manager around to vent our frustration on, we we're eventually escorted to a shoe box sized bog standard room instead of the superior studio we had booked and paid for. The failures of …
1 star: Bad	In a age of covid19 booking.com is charging me €784 to cancel a booking in Croatia. I cannot leave the USA nor can I enter Croatia. This is all beyond my control and Booking.com is not interested in me, only in how to gouge their customers.; In a age of covid19 booking.com is charging me €784 to cancel a booking in Croatia. I cannot leave the USA nor can I enter Croatia. This is all beyond my con…
1 star: Bad	like many others we have lost a lot of money and my partner has lost his job and like THE WHITE HOUSE INN in Whitby you chose not to refund in part or full or offer a alternative date you both did nothing you was not forced YOU CHOSE this is somthing i will never forget and when this wonderful world and people in it return to health you will be remembered for your greed and selfishness we will ne…
1 star: Bad	I have been disgusted with the service provided by booking.com ! Every advisor i have spoken to has told me something completely different and nobody has been any help which has resulted in us paying for a holiday that we couldn't even go on following COVID-19. The lack of support is outrageous, you would expect far better care from a company as big as this. Money grabbers is all i can call them.…
1 star: Bad	Booked a Disneyland Paris hotel through booking.com. After the park closure I immediately got on the phone with the hotel who stated categorically that they would refund the tickets without penalty given the extraordinary circumstances, but that it would have to processed through booking.com. After about 100 phone call attempts and social media messages, not to mention the fact that the booking.c…
1 star: Bad	BE VERY CAREFUL DEALING WITH WITH THIS COMPANY I have contacted a number of agencies in response to your policy of withholding our pre-paid hotel rate payments. The non-refundable rate is designed for those individuals who may have had a change of circumstances or have decided to make other arrangements prior to their booking. But under these new unprecedented COVID-19 travel restrictions (in whi…
1 star: Bad	I have booked a luxury apartment in Milan for April 2019. After 2 months from the confirmation and payment the host has cancelled the booking. They have not refunded me (about 1650 €) and they don't reply to my messages and calls. I have knew that many peoples are in the same conditions. Then I have booked another apartment for the same period, hoping for a refund from Booking of the first one. N…
1 star: Bad	We had 4 rooms booked for August at a very cheap price. They were booked almost one year in advance. 5 months before the trip date, Booking contacted us telling the hotel couldn't host us anymore and cancelled it after trying to provide two completely unsatisfying alternatives. After the cancellation, the same hotel offered those rooms for the same dates, but at triple the price. Very disappointi…
1 star: Bad	BEWARE BOOKING.COM I was billed three times for the same night. There is no recourse, no email address, a robot answers 800 number and cannot find information. They have zero customer service. If you have a problem, you are screwed. Stay away.; BEWARE BOOKING.COM; I was billed three times for the same night. There is no recourse, no email address, a robot answers 800 number and cannot find inform…
1 star: Bad	My trip was forced to be cancelled due to Coronavirus and they refused to give any refund. The property we had booked was offering refunds if you booked directly with them but since I used booking.com I'm just out of luck. No phone number to call and no way to submit a help ticket. Lost 100% of the money I had put down. I'll never do business with them again. STAY AWAY!; My trip was forced to be …
1 star: Bad	I have long been a customer of Booking.com, but no longer. The have been little to no help during the COVID 19 pandemic. I had a reservation in Switzerland for May, and when they came out with their forced circumstances policy, they did not include the United States as one of the countries affected so because of that, the person I was renting from, refused to not charge me. It mattered not that t…
1 star: Bad	Poor reaction to the coronavirus outbreak. AirBNB have done the correct thing by refunding all bookings, regardless of cancellation policy. Booking.com have been inadequate and frankly useless. Will never book with them again.; Poor reaction to the coronavirus outbreak. AirBNB have done the correct thing by refunding all bookings, regardless of cancellation policy. Booking.com have been inadequat…
5 stars: Excellent	I had a reservation with partial-refund in case of cancellation, but unfortunately my flight got cancelled due to coronavirus, so I couldn't stay at the hotel. All I had to do to get a full refund was to press one button! On the other hand, in one of their main competitors, I wasted an extensive amount of time in calls and e-mails to sort out my issue, with no result! I appreciate the effort book…
1 star: Bad	BOOKING COM’s actions caused damage. This company can cancel the reservation without agreement with the hotel, your object will be idle and BOOKING.COM will not reimburse you for the cost of room downtime, this is the principle of work of this company with partners, we have such an impression, it’s better to work with other booking sites, but not with booking.com. There is only one opinion about …
1 star: Bad	Absolutely useless, charged me twice, once in February & again in March, didn't ask me,no notice whatsoever,,been waiting over a week for a refund & still haven't got it. Disgusting service; Absolutely useless, charged me twice, once in February & again in March, didn't ask me,no notice whatsoever,,been waiting over a week for a refund & still haven't got it. Disgusting service
1 star: Bad	awful service from booking.com hotel cancelled due to coronavirus, & booking.com say no refund is possible; awful service from booking.com; hotel cancelled due to coronavirus, & booking.com say no refund is possible
5 stars: Excellent	Booking.com were great with helping me out with my hotel reservation refund. It took a few calls over the course of 2 weeks however managed to get me a refund with hotel especially when they refused first few times. Persistence is key! Thank you to those who helped me during this tricky period.; Booking.com were great with helping me out with my hotel reservation refund. It took a few calls over …
1 star: Bad	If there is zero star, I would have selected it. Booking.com service sucks during the crisis we are all in. No help or service is available, except to push all responsibility to the property. We have been using booking.com for many years, this is really disappointing and we will not use them again; If there is zero star, I would have selected it. Booking.com service sucks during the crisis we are…
2 stars: Poor	I've used Booking.com for several years - I've found the booking process to be simple, their prices ok (you could 'nickle and dime' rates by going elsewhere) and their online service acceptable providing your need is simple and straight forward. However, woe betide you if there is a problem between you and the hotel - they are no where in sight. They love to take their booking fee then simply was…
5 stars: Excellent	outstanding service - so impressed with booking.com. Had holiday booked to USA from Uk, cancelled due to the pandemic. Had made a few bookings at hotles, where at the time took the option of no refund- as had no thoughts of not being there!! Due to this pandemic all travel cancelled, but all various hotels agreed to the payments to be refunded - excellent service and answered the phone within a m…
1 star: Bad	BEWARE booking.com prefers profit rather than customers feed back on hotels booked in Homestay Walsall for 9 nights in Feb 2020 could not stay for 1 night disgusting property on entering bins full of rubbish dirty clothes strewn all over rear garden like builders site small bedroom sheets not changed no curtains photos to prove this Booking.com not interested had my money still taking bookings wh…
1 star: Bad	I tried to use Booking.com to book a room at a price stated on their website. They charged my card twice, didn't book the room, then charged my card a third time at a higher amount. All of these transactions led to my card being frozen by Citibank. When I asked them for a refund for the additional amount they had charged, Booking.com first told me to contact the property. Obviously, the property …
1 star: Bad	Booked an apartment under the management of MyTokyoStays.com or MTS , Weeks of effort to get our refund due to the global pandemic and they gave zero tolerance regardless the current pandemic because of so called “no refund under 30days policy”; Booked an apartment under the management of MyTokyoStays.com or MTS , Weeks of effort to get our refund due to the global pandemic and they gave zero tol…
1 star: Bad	After reading previous reviews, I hope that Booking.com makes efforts to satisfy their customers during this pandemic. I was refunded most of the money I was charged for a 2 day booking in Scotland. However, I am still short $35 and change. After a few emails to the hostel and Booking.com, was getting the run around. During these streseed times, I cannot affort to lose any money. Another Booking.…
1 star: Bad	Booking.com and hotel had promised full refund due to corona virus restrictions of travel. How hotel broke their promise and offered vouchers for another stay which i cant use. Booking.com has done nothing to help even though they are contract holder. They dont take responsibilty and you cant get in contact with. We can only hope that this crisis will make them go down so we can get a more player…
5 stars: Excellent	Incredible quick refund given by Booking.com for my car hire in Orlando due to COVID-19. Thank you ever so much for a hassle free transaction!; Incredible quick refund given by Booking.com for my car hire in Orlando due to COVID-19.; Thank you ever so much for a hassle free transaction!
3 stars: Average	I was going to give Booking.com half a star after being sent an email stating that despite the fact that the owners of the accommodation had originally kindly agreed to waive the cancellation fee owing to German border closure they had decided to renege on the arrangement and bill me. Naturally I made contact and was told that they had NOT charged me! Since it was a considerable amount I was conc…
1 star: Bad	Booking.com were not helpful when it came to a refund. we had booked a property in Portugal, we didn't realise the cost would be non refundable but did we didn't anticipate the coronavirus. We have been unable to receive a refund even though booking.com had stated in their statement that they encourage all hosts to refund due to force cirumstances. It seems that if you are from the UK there are n…
1 star: Bad	If I could give booking.com zero stars I would. My son booked a trip through them for a hotel in Florida. His flight was canceled because of COVID-19. Booking.com will not refund your money. It’s a complete hassle. In my opinion they are not a trustworthy company. If anything happens you’ll either get charged a huge cancellation fee or no refund at all. COVID-19 has affected everyone. However the…
1 star: Bad	I booked the Holiday Inn express in Hasselt for two nights, 16th and 17th March. The booking was none refundable but after emailing the hotel and explaining that due to the Covid-19 virus our customer cancelled the meeting. I asked if under the circumstances could you either refund the payment or give me a credit until we could reschedule the meeting. The hotel called me and told me that they wou…
1 star: Bad	I booked a holiday to Croatia, and cancelled because of the coronavirus, there was a cancelation fee, which i paid and i expected a refund of the rest, as we had to pay total amount up front. But when i hit the cancel button, i recieved an email saying the holiday was non refundable, i have read the paper work and it doesnt say that anywhere, utterly disgusted with Booking.com. Will never use the…
2 stars: Poor	Booked an apartment with Booking.com as we are going to Cyprus for a wedding in August ..just received an email from them to say our booking has been cancelled and they are refunding fees for accommodation! The only thing is we didn't cancel ! Now we have no where to stay ! I have emailed them and used every contact method available to reverse this and no one has come back to me ! I am absolutely…
1 star: Bad	The hotel charged me 20% more than the cancellation fee shown by Booking.com. Booking.com refused to refund the excess charge claiming that this was "Mexican VAT". Completely outrageous - they are obliged to show the final cancellation fee to consumers, not add random local taxes to the sum. Will be turning to consumer protection authorities as this is completely illegal and borderline criminal.;…
1 star: Bad	The continuous batting back and forth between the hotel and booking.com is exhausting. The response I've seen from one of the members of staff to a customer on Facebook sums up their disgusting level of customer service during a worldwide pandemic 'Hi, only to put your figure into perspective, 2500 negative comments is less than 0.2% of the 1,550,000 reservations we used to have on a daily basis.…
1 star: Bad	I went to Cape Verde and my apartment didn’t live up to any standards; the room was so damp that water was dripping off the walls and the shower only had freezing water with no pressure. Next day, I went to hand back the key. The host marked me as a no-show and booking.com just believed her side of the story. I don’t even have the chance to write a bad review of the place or to get a I will not u…
4 stars: Great	Booking.com were a bit slow off the mark with the implications of Covid 19. I guess there were lots of uncertainties early on with different countries responding differently but this is one of the challenges an international company needs to be able to handle. Now though they are getting to grips with it and are processing cancellations and refunds and with a notice about Coronavirus on the booki…
1 star: Bad	Same as other users, booked to stay next week at Broadway Suites NY and ugly service from Booking and even uglier from Broadway Suites. Even NYC is on crisis due to COVID-19 they refused to cancel our reservation with a full refund or even leaving the reservation open for the future. They said they have a very strict policy and no refunds and never answered me back about changing dates. Obviously…
1 star: Bad	The 1st and LAST time booking wih Booking.com. Airbnb gave full refunds for Paris apt without us even asking for one. Altho I am sure owners of these accommodations can also initiate/ push for refunds instead of simply submitting to the org's clause during this global crisis.; The 1st and LAST time booking wih Booking.com. Airbnb gave full refunds for Paris apt without us even asking for one. Alt…
5 stars: Excellent	We recently booked our 4th stay through booking.com to Bali but due to the recent circumstances regarding COVID-19, were concerned we would lose our booking for May 2020 which we had paid upfront for. The customer service team & villa were extremely understanding and efficient when helping us rearrange the dates at no extra cost. I’m extremely happy with the service we’ve received and we will con…
1 star: Bad	Booking.com is a simply a scam. Booked through them and now the resort is closed. The arrogant bas.... try to get you to cancel the booking by sending an sms and then written in small it says that if you cancel you will not be refunded and will loose you booking... basically they try to f... you twice. Will never ever use them again.; Booking.com is a simply a scam.; Booked through them and now t…
1 star: Bad	Disgusting company, I have sent them a few emails about a refund and not had one reply. I cancelled a reservation within 24hrs back in january2020 and I'm still waiting for a refund as Roosecote Guest House still took a payment even though we didn't stay there. Christina Birchall; Disgusting company, I have sent them a few emails about a refund and not had one reply. I cancelled a reservation wit…
1 star: Bad	Just like everybody else - general disgust with Booking.com "service" in hard times. Booking.com claim to be a "platform" and take no responsibility for any property which can scam and abuse your reservation and credit card with no repercussions. We had an issue with them before but let it slip, however.... as they say in good times it's easy to be nice... in bad times... you see one's real face …
1 star: Bad	What an absolute joke of a company,I’ve been using booking.com for years and find there customer service on the Coronavirus issue disgusting.We had booked to go to Malta on the 2nd for three nights with friends but obviously can’t get there we contacted the hotel who said it wasn’t a problem to change the dates but had to go through b.com.We eventually got through to b.com by phone and was told w…
1 star: Bad	I booked an apartment rental with Booking.com. We were due to meet up with friends in York at the start of the Coronavirus scare and, in trying to find out what our options were with cancellation on our already fully paid-up booking, we accidentally cancelled the booking. We contacted Booking.com immediately and the booking was re-instated but they now say that we can't have our promised £100 reb…
1 star: Bad	I've realised what scammers this company is. I had booked accommodation & I'm unable to travel due to a country/global international ban on all travels. I'm unable to travel & cannot use the accommodation. Nor would you want to during this crisis. They refuse to refund money, is unprofessional & unsympathetic. Every company & country is helping people get past this difficult period. This company …
1 star: Bad	If i could give 0 stars i would. Absolutely despicable company. During this coronavirus global pandemic they refuse to give refunds and force you to compromise your health and finances. They forced us to reschedule and what’s even worse is that once we chose new dates with rates off their website they refuse to honor the price we see right on their site. They claim their computer shows a more exp…
1 star: Bad	I received an email from the hotel confirming I’d get a full refund weeks ago due to coronavirus. Since then I’ve not received a penny back and booking.com are ignoring me completely. So they are fraudulently holding my money. NEVER using them again.; I received an email from the hotel confirming I’d get a full refund weeks ago due to coronavirus. Since then I’ve not received a penny back and boo…
1 star: Bad	I normally do not leave reviews but I am so disgusted by booking.com that it has compelled me to do so. My sister who is a nurse, decided to book a apartment for 5 month so she is able to be closer to work so she could do more shift's to help with this pandemic. After paying her £1900 deposit (all her savings) to booking.com she was given a customer ref number that was not recognised when trying …
1 star: Bad	Reviews don`t matter as they make billions every year, They are a true disgrace and just lie. Current Worldwide epidemic called several times every agent gives different information some say you have to travel as we cant cancel as booked through 3rd party. some say what government lock down. A Shambles of a company that makes millions - Ok they offer good value property and take a hefty commissio…
1 star: Bad	Awful customer service. Cancelled hotel due to all flights being grounded. Hotel only refunding 50%, to make matters worse, Booking.com only refunded 10%, wont even acknowledge emails, and are impossible to contact. Happy Home Budapest is the hotel who are offering half refund.; Awful customer service. Cancelled hotel due to all flights being grounded. Hotel only refunding 50%, to make matters wo…
1 star: Bad	Avoid booking.com, especially Cosmos Apartments Canary Wharf. If you have booked with them by mistake, please cancel your booking as soon as you can. They are ignoring government measures on c19 global pandemic - no refund or rebooking option. The landlord has also ignored the mail correspondence made trough booking.com website / very unprofessional during phone conversation.; Avoid booking.com, …
1 star: Bad	The company i will never use again, in any country, under any circumstances. Unethical company, that doesn't care about their customers. They hired a very good lawyers, that made double message in such a way, that both partners and they have some excuse for not accepting the situation of Force Majeure we all are facing. What a shame.; The company i will never use again, in any country, under any …
1 star: Bad	Only company we booked during our holiday not prepared to refund based on Covid 19. Beware! Centre-Ville Guest House In Franschhoek South Africa wont refund either.; Only company we booked during our holiday not prepared to refund based on Covid 19. Beware! Centre-Ville Guest House In Franschhoek South Africa wont refund either.
1 star: Bad	Please everyone if you have a booking in the next few weeks that is non refundable then do nothing. The chances are the hotel will be closed as this will go on for many weeks. When the date has passed by financial law they must refund you as the hotel will be closed . Booking.com have admitted this so please don’t cancel a non refundable booking as you will loose the money and the awful disgracef…
1 star: Bad	Wow, such accurate reviews of poor service recently. Through the c19 global pandemic our flights were cancelled by the airlines and refunded almost immediately. B.Com wants me to deal directly with the hotel now. They're offering a credit to be used in 6-12 months then bye-bye Thnx for not coming. We're in lock down and stressing out as covid numbers sore. Just refund us! The money will be most a…
1 star: Bad	Despite booking with no pre payment or cancellation the hotel decided to pre authorise an amount. Now I’ve cancelled the booking I have lost money. Avoid avoid avoid - hope they go bust; Despite booking with no pre payment or cancellation the hotel decided to pre authorise an amount. Now I’ve cancelled the booking I have lost money. Avoid avoid avoid - hope they go bust
1 star: Bad	Stay away! They will reuse your credit card on file without your knowledge, they are terrible to deal with and their customer service has no knowledge; Stay away! They will reuse your credit card on file without your knowledge, they are terrible to deal with and their customer service has no knowledge
1 star: Bad	Should be ashamed of themselves holding on to peoples money. Had to cancel our Easter break due to covid-19 so out of everyone's hands and they are refusing to refund me my money saying I can rebook within 12 months. They wont listen I want my money back as I am not guaranteed same time off as my partner and to match this with school holidays. Disgusting company and behaviour; Should be ashamed o…
1 star: Bad	after calling them for hours they made a promise to refund the trip due to cover, but know 2 weeks later still no money, and the is no way to call anymore and every email reply is looking like i have to start over every time , its either automated or clueless. the host from "Aloni Neve Zohar Dead Sea" is not returning call or emails either; after calling them for hours they made a promise to refu…
Daniella Thompson; 1 star: Bad	I had a payment of £90 taken out of my account on 21st October 2019. Since then i have been trying to resolve this with booking.com. On January 8th i got this response: "Please, be informed that the charge of 90.00 GBP has been made for a reservation made on 21 Oct 2019, 13:55 for a property in [city name] with check-in 22Tue, Oct 2019" But also adding they cannot disclose any more information re…
1 star: Bad	I've used Booking.com for years and been very happy with them. However, for the first time I paid in advance for a property for my forthcoming holiday in Thailand, (Bangkok), which has now been cancelled due to Covid 19. Having read online that many people are being advised by Booking.com that the property should be contacted, and with the properties advising that Booking.com should be contacted,…
1 star: Bad	Terrible company, terrible service. Avoid. Like many others, I found Booking to be the only company who are refusing to do refunds during this time of crisis. Disgraceful really during such time. I'm sorry for the people who work for them but I hope they don't survive this, if they do I'll never use them again that's for sure.; Terrible company, terrible service. Avoid.; Like many others, I found…
1 star: Bad	I have had to cancel a trip due to the Coronavirus and not being able to travel with my high risk sister and this insensitive company not only kept my deposit,but even after cancelling, have taken the full payment from my account. I have raised the complaint with them and they are not responding. I am appalled and will never be using them again! I wont give up to resolve this issue!; I have had t…
1 star: Bad	Like many here, I am stuck with a $2000 non-refundable booking that I can't use due to do not travel bans. Airbnb made the right decision to refund all customers; why not booking.com? I will NEVER use this company again.; Like many here, I am stuck with a $2000 non-refundable booking that I can't use due to do not travel bans. Airbnb made the right decision to refund all customers; why not bookin…
1 star: Bad	Booking.com HANG UP ON our request It was an absolutely unpleasant experience with H.Huang. We are in QLD Australia so we cannot make our reservation in Melbourne due to the world wide pandemic. A company like 'booking.com' should be more flexible with their policies in the event of a global emergency. There was no sympathy in this unfortunate situation. She kept repeating that the ticket was non…
Karyn Hahn Dickerson; 1 star: Bad	Due to the COVID crisis, I cannot believe that Huntington by the Sea And booking m.com refuses to give a full refund during this time. With people unable to work and mandated by the President to stay at home and the area beaches closed, not giving a full refund is heartless and terrible customer service. I know other condos in the area ex. Maravilla is giving full refunds. In the future, I will n…
1 star: Bad	Our country closed the borders and our flight has been cancelled because of Covid-19. We CAN'T reach our destination even if we wanted to!! No refund, no help from booking.com. Horrible and useless service!!! Such a disappointment. Pure discrimination towards people in my country since they claim that people from Italy and France (and some other countries) can get a full refund no matter what. HO…
[truncated: 312 more rows]
